# Supplementary material for: Study protocol: quantitative fibronectin to help decision-making in women with symptoms of preterm labour (QUIDS) part 2, UK Prospective Cohort Study
Source: PubMed Central journal article supplement (PMC5914783; doi:10.1136/bmjopen-2017-020795), 2018-04-19
Supplement: bmjopen-2017-020795.draft_revisions.pdf [file bmjopen-2017-020795.draft_revisions.pdf]

# BMJ Open

BMJ Open is committed to open peer review. As part of this commitment we make the peer review history of every article we publish publicly available.

When an article is published we post the peer reviewers' comments and the authors' responses online. We also post the versions of the paper that were used during peer review. These are the versions that the peer review comments apply to.

The versions of the paper that follow are the versions that were submitted during the peer review process. They are not the versions of record or the final published versions. They should not be cited or distributed as the published version of this manuscript.

BMJ Open is an open access journal and the full, final, typeset and author-corrected version of record of the manuscript is available on our site with no access controls, subscription charges or pay-per-view fees (<http://bmjopen.bmj.com>).

If you have any questions on BMJ Open's open peer review process please email [info.bmjopen@bmj.com](mailto:info.bmjopen@bmj.com)

# BMJ Open

## Study Protocol: Quantitative Fibronectin to help Decision-making in women with Symptoms of Preterm Labour (QUIDS) Part Two- Prospective Cohort Study

|                               |                                                                                                                                                                                                                                                                                                                                                                                                                                                                                                                                                                                                                                                                                                                                                                                                                                                                                                                                                                                                                                                                                                                                                                                                                                                                                                                                                                                                                                                                                                                                                                                                                                                                                                                                                                                     |
|-------------------------------|-------------------------------------------------------------------------------------------------------------------------------------------------------------------------------------------------------------------------------------------------------------------------------------------------------------------------------------------------------------------------------------------------------------------------------------------------------------------------------------------------------------------------------------------------------------------------------------------------------------------------------------------------------------------------------------------------------------------------------------------------------------------------------------------------------------------------------------------------------------------------------------------------------------------------------------------------------------------------------------------------------------------------------------------------------------------------------------------------------------------------------------------------------------------------------------------------------------------------------------------------------------------------------------------------------------------------------------------------------------------------------------------------------------------------------------------------------------------------------------------------------------------------------------------------------------------------------------------------------------------------------------------------------------------------------------------------------------------------------------------------------------------------------------|
| Journal:                      | <i>BMJ Open</i>                                                                                                                                                                                                                                                                                                                                                                                                                                                                                                                                                                                                                                                                                                                                                                                                                                                                                                                                                                                                                                                                                                                                                                                                                                                                                                                                                                                                                                                                                                                                                                                                                                                                                                                                                                     |
| Manuscript ID                 | bmjopen-2017-020795                                                                                                                                                                                                                                                                                                                                                                                                                                                                                                                                                                                                                                                                                                                                                                                                                                                                                                                                                                                                                                                                                                                                                                                                                                                                                                                                                                                                                                                                                                                                                                                                                                                                                                                                                                 |
| Article Type:                 | Protocol                                                                                                                                                                                                                                                                                                                                                                                                                                                                                                                                                                                                                                                                                                                                                                                                                                                                                                                                                                                                                                                                                                                                                                                                                                                                                                                                                                                                                                                                                                                                                                                                                                                                                                                                                                            |
| Date Submitted by the Author: | 24-Nov-2017                                                                                                                                                                                                                                                                                                                                                                                                                                                                                                                                                                                                                                                                                                                                                                                                                                                                                                                                                                                                                                                                                                                                                                                                                                                                                                                                                                                                                                                                                                                                                                                                                                                                                                                                                                         |
| Complete List of Authors:     | <p>Stock, Sarah; University of Edinburgh MRC Centre for Reproductive Health, Tommy's Centre for Maternal and Fetal Health; University of Western Australia School of Women's and Infant's Health,<br/>         Wotherspoon, Lisa; University of Edinburgh MRC Centre for Reproductive Health, Tommy's Centre for Maternal and Fetal Health<br/>         Boyd, Kathleen; University of Glasgow, Health Economics &amp; Health Technology Assessment<br/>         Morris, R. K.; Univ Birmingham, School of Clinical and Experimental Medicine<br/>         Dorling, Jon; Queen's Medical Centre, Neonatal Unit<br/>         Jackson, Lesley; Royal Hospital for Children Glasgow, Neonatal Unit<br/>         Chandiramani, Manju; Imperial College Healthcare NHS Trust, Queen Charlotte and Chelsea Hospital, Du Cane Road, Shepherds Bush, London, W12 0HS<br/>         David, Anna; University College London Medical School, Institute for Womens Health<br/>         Khalil, Asma; St. George's Medical School, University of London<br/>         Shennan, Andrew; Kings College London, Maternal and Fetal Research Unit<br/>         Hodgetts Morton, Victoria ; Birmingham Women's Hospital, Metchley Park Road, Edgbaston, ,<br/>         Lavender, Tina; Manchester University<br/>         Khan, Khalid; Queen Mary, University of London, Centre for Primary Care and Public Health<br/>         Harper-Clarke, Susan; PPI Representative<br/>         Mol, Ben; University of Adelaide, The Robinson Institute, School of Paediatrics and Reproductive Health<br/>         Riley, Richard; Keele University<br/>         Norrie, John; Edinburgh Clinical Trials Unit, University of Edinburgh No. 9, Bioquarter<br/>         Norman, Jane; University of Edinburgh</p> |
| Keywords:                     | Pregnancy, Preterm Birth, Fetal Fibronectin, Cervix, Diagnostic Test                                                                                                                                                                                                                                                                                                                                                                                                                                                                                                                                                                                                                                                                                                                                                                                                                                                                                                                                                                                                                                                                                                                                                                                                                                                                                                                                                                                                                                                                                                                                                                                                                                                                                                                |

SCHOLARONE™  
Manuscripts

1  
2  
3 **1 Study Protocol: Quantitative Fibronectin to help Decision-making in women**  
4 **2 with Symptoms of Preterm Labour (QUIDS) Part Two- Prospective Cohort**  
5 **3 Study**

6  
7  
8  
9 4 Sarah J Stock\*<sup>1,2</sup> Sarah.Stock@ed.ac.uk  
10  
11 5 Lisa Wotherspoon<sup>1</sup> Lisa.Wotherspoon@ed.ac.uk  
12  
13 6 Kathleen Boyd<sup>3</sup> Kathleen.Boyd@glasgow.ac.uk  
14  
15 7 Rachel K Morris<sup>4</sup> r.k.morris@bham.ac.uk  
16  
17 8 Jon Dorling<sup>5</sup> Jon.Dorling@nottingham.ac.uk  
18  
19 9 Lesley Jackson<sup>6</sup> Lesley.Jackson@ggc.scot.nhs.uk  
20  
21 10 Manju Chandiramani<sup>7</sup> m.chandiramani@imperial.ac.uk  
22  
23 11 Anna David<sup>8</sup> a.david@ucl.ac.uk  
24  
25 12 Asma Khalil<sup>9</sup> akhalil@sgul.ac.uk  
26  
27 13 Andrew Shennan<sup>10</sup> andrew.shennan@kcl.ac.uk  
28  
29 14 Victoria Hodgetts-Morton<sup>4</sup> v.a.h.morton@bham.ac.uk  
30  
31 15 Tina Lavender<sup>11</sup> Tina.Lavender@manchester.ac.uk  
32  
33 16 Khalid Khan<sup>12</sup> k.s.khan@qmul.ac.uk  
34  
35 17 Susan Harper-Clarke<sup>13</sup> su\_clarke@hotmail.com  
36  
37 18 Ben Mol<sup>14</sup> ben.mol@adelaide.edu.au  
38  
39 19 Richard D. Riley<sup>15</sup> r.riley@keele.ac.uk  
40  
41 20 John Norrie<sup>16</sup> J.Norrie@ed.ac.uk  
42  
43 21 Jane Norman<sup>1</sup> Jane.Norman@ed.ac.uk

44 22 1. Tommy's Centre for Maternal and Fetal Health, University of Edinburgh MRC  
45 23 Centre for Reproductive Health, Queen's Medical Research Institute, Edinburgh, UK.  
46  
47 24 2. School of Women's and Infants' Health, University of Western Australia, Crawley  
48  
49 25 WA 6009, AUS. 3. Institute of Health & Wellbeing Health Economics & Health  
50  
51 26 Technology Assessment, University of Glasgow, 1 Lilybank Gardens, Glasgow, UK.  
52  
53 27 4. School of Clinical and Experimental Medicine, University of Birmingham,  
54  
55 28 Birmingham, UK. 5. Queen's Medical Centre, Neonatal Unit, Derby Road,  
56  
57  
58  
59  
60

1  
2  
3 1 Nottingham, UK. 6. Royal Hospital for Children Glasgow, Neonatal Unit  
4  
5 2 Glasgow, UK. 7. Imperial College Healthcare NHS Trust, Queen Charlotte and  
6  
7 3 Chelsea Hospital, Du Cane Road, Shepherds Bush, London, UK. 8. University  
8  
9 4 College London Medical School, Institute for Women's Health Health, 86-96 Chenies  
10  
11 5 Mews, University College London Medical School London, UK. 9. St. George's  
12  
13 6 Medical School, University of London, London, UK. 10. Kings College London,  
14  
15 7 Maternal and Fetal Research Unit Maternal and Fetal Research Unit 10th Floor,  
16  
17 8 North Wing London, UK. 11. University of Manchester School of Nursing, Midwifery &  
18  
19 9 Social Work, Jean McFarlane Building, University Place, Oxford Road  
20  
21 10 Manchester, UK. 12. Queen Mary, University of London, Centre for Primary Care and  
22  
23 11 Public Health London, UK. 13. Patient and Public Involvement Representative. No  
24  
25 12 affiliation. 14. University of Adelaide, The Robinson Institute, School of Paediatrics  
26  
27 13 and Reproductive Health Adelaide, SA, AUS. 15. Research Institute for Primary Care  
28  
29 14 and Health Sciences, Keele University, Keele, UK. 16. Edinburgh Clinical Trials Unit,  
30  
31 15 University of Edinburgh No. 9, Bioquarter Edinburgh, UK.

32  
33 16

34  
35 17 \*Corresponding Author: Dr Sarah J Stock Senior Clinical Lecturer Maternal and Fetal  
36  
37 18 Medicine, MRC Centre for Reproductive Health, Queen's Medical Research Institute,  
38  
39 19 47 Little France Crescent, Edinburgh, EH16 4TJ. Tel: 0131 242 6449 Email:  
40  
41 20 [sarah.stock@ed.ac.uk](mailto:sarah.stock@ed.ac.uk)

42  
43 21

44  
45 22 **Word Count:** 4,928

46  
47 23 **Key Words:** Pregnancy; Preterm Birth; Fetal Fibronectin; Cervix; Diagnostic Test.

48  
49 24

50  
51 25

## 1           2           3           4           5           6           7           8           9           10           11           12           13           14           15           16           17           18           19           20           21           22           23           24           25           26           27           28           29           30           31           32           33           34           35           36           37           38           39           40           41           42           43           44           45           46           47           48           49           50           51           52           53           54           55           56           57           58           59           60

### 1           2           3           4           5           6           7           8           9           10           11           12           13           14           15           16           17           18           19           20           21           22           23           24           25           26           27           28           29           30           31           32           33           34           35           36           37           38           39           40           41           42           43           44           45           46           47           48           49           50           51           52           53           54           55           56           57           58           59           60

## 1           2           3           4           5           6           7           8           9           10           11           12           13           14           15           16           17           18           19           20           21           22           23           24           25           26           27           28           29           30           31           32           33           34           35           36           37           38           39           40           41           42           43           44           45           46           47           48           49           50           51           52           53           54           55           56           57           58           59           60

### 1           2           3           4           5           6           7           8           9           10           11           12           13           14           15           16           17           18           19           20           21           22           23           24           25           26           27           28           29           30           31           32           33           34           35           36           37           38           39           40           41           42           43           44           45           46           47           48           49           50           51           52           53           54           55           56           57           58           59           60

2           3           4           5           6           7           8           9           10           11           12           13           14           15           16           17           18           19           20           21           22           23           24           25           26           27           28           29           30           31           32           33           34           35           36           37           38           39           40           41           42           43           44           45           46           47           48           49           50           51           52           53           54           55           56           57           58           59           60

2           3           4           5           6           7           8           9           10           11           12           13           14           15           16           17           18           19           20           21           22           23           24           25           26           27           28           29           30           31           32           33           34           35           36           37           38           39           40           41           42           43           44           45           46           47           48           49           50           51           52           53           54           55           56           57           58           59           60

6           7           8           9           10           11           12           13           14           15           16           17           18           19           20           21           22           23           24           25           26           27           28           29           30           31           32           33           34           35           36           37           38           39           40           41           42           43           44           45           46           47           48           49           50           51           52           53           54           55           56           57           58           59           60

6           7           8           9           10           11           12           13           14           15           16           17           18           19           20           21           22           23           24           25           26           27           28           29           30           31           32           33           34           35           36           37           38           39           40           41           42           43           44           45           46           47           48           49           50           51           52           53           54           55           56           57           58           59           60

18           19           20           21           22           23           24           25           26           27           28           29           30           31           32           33           34           35           36           37           38           39           40           41           42           43           44           45           46           47           48           49           50           51           52           53           54           55           56           57           58           59           60

18           19           20           21           22           23           24           25           26           27           28           29           30           31           32           33           34           35           36           37           38           39           40           41           42           43           44           45           46           47           48           49           50           51           52           53           54           55           56           57           58           59           60

21           22           23           24           25           26           27           28           29           30           31           32           33           34           35           36           37           38           39           40           41           42           43           44           45           46           47           48           49           50           51           52           53           54           55           56           57           58           59           60

21           22           23           24           25           26           27           28           29           30           31           32           33           34           35           36           37           38           39           40           41           42           43           44           45           46           47           48           49           50           51           52           53           54           55           56           57           58           59           60

23           24           25           26           27           28           29           30           31           32           33           34           35           36           37           38           39           40           41           42           43           44           45           46           47           48           49           50           51           52           53           54           55           56           57           58           59           60

23           24           25           26           27           28           29           30           31           32           33           34           35           36           37           38           39           40           41           42           43           44           45           46           47           48           49           50           51           52           53           54           55           56           57           58           59           60

## 25           26           27           28           29           30           31           32           33           34           35           36           37           38           39           40           41           42           43           44           45           46           47           48           49           50           51           52           53           54           55           56           57           58           59           60

### 25           26           27           28           29           30           31           32           33           34           35           36           37           38           39           40           41           42           43           44           45           46           47           48           49           50           51           52           53           54           55           56           57           58           59           60

### 26           27           28           29           30           31           32           33           34           35           36           37           38           39           40           41           42           43           44           45           46           47           48           49           50           51           52           53           54           55           56           57           58           59           60

#### 26           27           28           29           30           31           32           33           34           35           36           37           38           39           40           41           42           43           44           45           46           47           48           49           50           51           52           53           54           55           56           57           58           59           60

- 27           28           29           30           31           32           33           34           35           36           37           38           39           40           41           42           43           44           45           46           47           48           49           50           51           52           53           54           55           56           57           58           59           60
- 27           28           29           30           31           32           33           34           35           36           37           38           39           40           41           42           43           44           45           46           47           48           49           50           51           52           53           54           55           56           57           58           59           60

- 1  
2  
3 1 • Health Economic Analysis to determine cost effectiveness from NHS  
4  
5 2 perspective  
6  
7 3  
8  
9 4

#### 4 **Limitations**

- 10 5 • Not a randomized control trial to test effectiveness of the model on improved  
11  
12 6 patient outcomes  
13  
14 7  
15  
16

#### 8 **HOW PATIENTS ARE INVOLVED IN THIS STUDY**

18 9 Patient representatives were consulted during the protocol development and  
19  
20 10 have been invited to join the Project Management Group and the Trial Steering  
21  
22 11 Committee. Prior to commencing QUIDS, we performed a qualitative study to  
23  
24 12 determine the decisional needs of pregnant women with signs and symptoms of  
25  
26 13 preterm labour, their partners and their caregivers. This is described in the  
27  
28 14 separate protocol “QUIDS Qualitative” (Supplementary Material). The end  
29  
30 15 product of QUIDS will be a decision support aid to help clinicians, women and  
31  
32 16 their partners decide on management of threatened preterm labour, based on the  
33  
34 17 results of the quantitative fFN. In QUIDS Qualitative women and clinicians  
35  
36 18 indicated that they would prefer this to be on web based or mobile app based  
37  
38 19 format, presenting the risk of preterm birth within seven days of testing.  
39  
40  
41 20  
42  
43 21  
44  
45  
46  
47  
48  
49  
50  
51  
52  
53  
54  
55  
56  
57  
58  
59  
60

## 1 INTRODUCTION

2 The overall aim of the QUIDS study is to develop a decision support tool for the  
3 management of women with symptoms and signs of preterm labour, based on a  
4 validated prognostic model using quantitative fFN testing. The study has been  
5 conceptually divided into two parts. In this, the protocol for QUIDS Part Two, we  
6 detail the protocol for a prospective cohort study. This will externally validate a  
7 prognostic model developed in QUIDS Part One.[1] More detailed background about  
8 the diagnosis of preterm labour and background to the study is provided in the  
9 introduction of QUIDS Protocol Part One.[1]

10

11 Fetal Fibronectin (fFN) is a biochemical test of preterm labour which has potential to  
12 help improve diagnosis of impending preterm delivery.[2] Much of the evidence about  
13 fFN to date relates to the qualitative fFN test, which provides a positive or negative  
14 result on the basis of a single threshold of 50ng/ml.[2,3] This test has been largely  
15 replaced with the Rapid fFN 10Q System, which provides a concentration of fFN  
16 (quantitative fFN) and may be a more useful predictor of preterm delivery. fFN is now  
17 only available with a quantitative analyser in the UK, but there is no consensus as to  
18 which women to use the test in, or how to interpret the results.

19

20 The QUIDS study will address this evidence gap by providing evidence about the  
21 potential value of the quantitative fFN test, along with guidance about how to  
22 interpret results. Here we detail the protocol for external validation of a prognostic  
23 model developed in QUIDS Part One.[1]

24

## 25 METHODS AND ANALYSIS

### 26 Aims and Methodologies

1  
2  
3 1 The aim of the QUIDS study is to develop a decision support tool for the  
4  
5 2 management of women with symptoms and signs of preterm labour, based on a  
6  
7 3 validated prognostic model using quantitative fFN testing.  
8  
9 4

10  
11 5 The study protocol has been divided into two parts (see flow chart Figure 1). The  
12  
13 6 protocols for Parts One and Two are reported in separate manuscripts.  
14  
15 7

16  
17 8 In QUIDS Protocol Part One we have described how we will perform (i) an Individual  
18  
19 9 Participant Data (IPD) meta-analysis, and (ii) and Economic Analysis. The protocol  
20  
21 10 details how we will develop and internally validate a prognostic model using  
22  
23 11 quantitative fFN and other risk (prognostic) factors and to evaluate the added value  
24  
25 12 of quantitative fFN toward this prognostic model performance. We will also provide  
26  
27 13 an economic rationale for the prognostic model and analyze its cost-effectiveness  
28  
29 14 from the perspective of the NHS.  
30  
31 15

32  
33 16 In this, the QUIDS Protocol Part Two, we will detail the prospective cohort study to  
34  
35 17 externally validate and, if necessary, refine the prognostic model. This will be  
36  
37 18 performed in at least eight UK hospitals with different settings (rural/urban) and  
38  
39 19 different levels of neonatal care facilities. In addition, acceptability of quantitative fFN  
40  
41 20 testing, and effects on maternal anxiety will be performed. We will assess the  
42  
43 21 potential cost-effectiveness of the final prognostic model/decision support tool. This  
44  
45 22 additional analysis will allow us to model the full costs and effect impacts of the  
46  
47 23 different prognostic model and compare these in a cost-effectiveness analysis to  
48  
49 24 provide an evidence-based economic rationale for implementing the diagnostic tool  
50  
51 25 in the NHS.  
52  
53 26

## 54 27 **Endpoints**

55  
56  
57  
58  
59  
60



1  
2  
3 1 The primary endpoint of the prognostic model is spontaneous preterm delivery within  
4  
5 2 seven days of qfFN test, in women less than 36 weeks' gestation. This was  
6  
7 3 influenced by the preceding QUIDS Qualitative Study, which included focus group  
8  
9 4 consultation to determine the decisional needs of women, their partners and  
10  
11 5 clinicians (Supplementary Material). It is also a recognised clinically important  
12  
13 6 endpoint, as antenatal steroids (which significantly reduce morbidity and mortality in  
14  
15 7 preterm babies[4]) are most effective if delivery occurs within seven days of  
16  
17 8 administration.

18  
19 9  
20  
21 10 A secondary endpoint suggested by QUIDS Qualitative Study (Supplementary  
22  
23 11 Material) consultation, was delivery within 48 hours of qfFN test. This analysis will be  
24  
25 12 performed if feasible to do so within the constraints of the data available for model  
26  
27 13 development and validation.[1]

#### 28 29 14 30 31 15 **Health technologies being assessed**

32  
33 16 The trial will evaluate the Rapid fFN 10Q System (Hologic, Malboroughm MA). This  
34  
35 17 provides a concentration of fFN (ng/ml or INVALID) in a vaginal swab sample in 10  
36  
37 18 minutes. It is now the only commercially available fFN test system, and replaces the  
38  
39 19 TLiQ rapid analyser system, which provided a qualitative fFN result (POSITIVE or  
40  
41 20 NEGATIVE) based on a threshold of 50ng/ml. The Rapid fFN 10Q system is a point  
42  
43 21 of care test, which clinical staff can easily perform. All reagents for fFN testing can be  
44  
45 22 stored at room temperature and specimen collection kits, reagents, cassettes and the  
46  
47 23 10Q analyzer can be kept in clinical areas where women with symptoms of preterm  
48  
49 24 labour are assessed so they can be conveniently accessed.

50  
51 25  
52  
53 26 Vaginal swab samples are analysed by lateral flow; solid-phase  
54  
55 27 immunochromatographic assay (the Rapid fFN Cassette), and interpreted in the 10Q  
56  
57 28 Rapid analyser. 200  $\mu$ L of the sample is pipetted into the sample application well of

1 the Rapid fFN Cassette using a polypropylene or polyethylene pipette. The sample  
2 will then flow from an absorbent pad across a nitrocellulose membrane via capillary  
3 action through a reaction zone containing murine monoclonal anti-fetal fibronectin  
4 antibody conjugated to blue microspheres (conjugate). The conjugate, embedded in  
5 the membrane, will be mobilized by the flow of the sample. The sample will then flow  
6 through a zone containing goat polyclonal antihuman fibronectin antibody that  
7 captures the fibronectin-conjugate complexes. The remaining sample will flow  
8 through a zone containing goat polyclonal anti-mouse IgG antibody that captures  
9 unbound conjugate, resulting in a control line. After 10 minutes of reaction time, the  
10 intensities of the test line and control line are interpreted with the 10Q Rapid analyser  
11 and a printed result provided as a concentration in ng/ml (0->500ng/ml) or INVALID.  
12 The result is invalid if the test does not meet internal quality controls that are  
13 performed automatically with every test. In the event of an invalid result, the test can  
14 be repeated with any remaining clinical specimen. A quality control can be performed  
15 by a reusable Rapid fFN 10Q QCette® QC Device, which verifies that the analyser  
16 performance is within specification.

### 17 18 **Target population**

19 The target population is pregnant women attending hospital with signs and  
20 symptoms of preterm labour.

### 21 22 **Validation And Refinement Of Prognostic Model**

#### 23 **Population**

24 The prospective cohort study will include women with signs and symptoms of  
25 preterm labour at 22<sup>+0</sup> to 34<sup>+6</sup> weeks gestation in whom admission, transfer or  
26 treatment is being considered. These will be recruited from at least eight sites with a  
27 mix of rural/urban settings, and have different levels of neonatal care facilities, over  
28 12 months.

1  
2  
3 1  
4  
5 2 Eligibility Criteria

6  
7 3 The following inclusion criteria will apply at screening assessment (all apply):

- 8  
9 4 • Women who are 22<sup>+0</sup> to 34<sup>+6</sup> weeks (or earlier gestation if the fetus is  
10 considered potentially viable).  
11  
12 5 • Women showing signs and symptoms of pre-term labour which may include  
13 any or all of back pain, abdominal cramping, abdominal pain, light vaginal  
14 bleeding, vaginal pressure, uterine tightenings or contractions.  
15  
16 6 • Women where hospital admission, interhospital transfer or treatment  
17 (antenatal steroids, tocolysis or magnesium sulphate) is being considered due  
18 to signs of pre-term labour.  
19  
20 7 • Women aged 16 years or above.

21  
22 13 The broad inclusion criteria reflect current clinical practice and enable the  
23 generalisability of the results of the trial for routine clinical care. We will include  
24 women who re-attend seven days or more after initial recruitment with signs and  
25 symptoms of preterm labour and also women who remain symptomatic but  
26 undelivered seven days later in whom repeat testing by the clinician is deemed to be  
27 appropriate. This will be in line with manufacturer's recommendation for fFN testing.  
28  
29  
30  
31  
32  
33  
34  
35  
36  
37  
38  
39  
40

41 20 The following inclusion criteria will apply on speculum examination:

- 42 21 • Cervical dilation  $\leq$  3cm  
43  
44 22 • Intact membranes  
45  
46 23 • No significant vaginal bleeding, as judged by the clinician.  
47  
48 24 • Once it has been established that the women meets the above criteria, on  
49 speculum examination, the fFN swab can be taken.  
50  
51

52  
53 26 Participants that sign the consent but are not eligible upon examination to have an  
54 fFN swab taken will still be enrolled and have outcome data collected.  
55  
56  
57  
58  
59  
60

- 1  
2  
3 1  
4  
5 2 The following exclusion criteria will apply:  
6  
7 3 • Contraindication to vaginal examination (e.g. placenta praevia).  
8  
9 4 • Higher order multiple pregnancy (triplets or more).  
10  
11 5 • Moderate or severe vaginal bleeding.  
12  
13 6 • Cervical dilatation greater than 3cm.  
14  
15 7 • Confirmed rupture of membranes.  
16  
17 8 • Sexual intercourse, vaginal examination or transvaginal ultrasound in the  
18  
19 9 preceding 24 hours factors may invalidate results. These women will be  
20  
21 10 initially excluded from the study, but can be included if still symptomatic after  
22  
23 11 24 hours, when fFN accuracy will be restored.  
24  
25  
26

### 27 13 Co-Enrolment

28  
29 14 This trial involves validating a decision support tool relating to a test that is currently  
30  
31 15 commonly used in clinical practice. As such, there are no additional interventions.  
32  
33 16 Co-enrolment in other non-interventional trials will be allowed. Co-enrolment in trials  
34  
35 17 of tocolytic treatments or other management strategies that may influence timing of  
36  
37 18 delivery as a primary outcome will not be allowed. Participation in QUIDs would not  
38  
39 19 preclude babies being subsequently involved in interventional trials. Co-enrolment  
40  
41 20 will be recorded in the electronic case report form (eCRF).  
42  
43  
44

### 45 22 Setting

46  
47 23 The prospective cohort study will take place in at least eight consultant-led obstetric  
48  
49 24 units in the UK. More than 93% of pregnant women in the UK deliver in consultant-  
50  
51 25 led units.[5,6] The vast majority of women with symptoms of preterm labour will  
52  
53 26 present to a consultant-led unit for assessment, either directly or following advice  
54  
55 27 from their community midwife or General Practitioner.  
56  
57  
58  
59  
60

1  
2  
3 1  
4  
5 2 The study will not include any community maternity units (staffed by midwives, with  
6  
7 3 or without involvement of non-obstetric medical staff), which cover a small proportion  
8  
9 4 of women, mainly in remote and rural areas. In the Perinatal Collaborative Transport  
10  
11 5 Study (CoTS study) of perinatal transfers in Scotland,[7] which involved 52,727  
12  
13 6 births, only 69 (0.13%) women were transferred to a consultant-led obstetric unit  
14  
15 7 from community maternity units, and only a proportion of these were for suspected  
16  
17 8 preterm labour. The small number of women cared for in community maternity units  
18  
19 9 means their inclusion would not be an efficient use of study resources.  
20

21 10  
22  
23 11 Given that management of women with symptoms of preterm labour and inter-  
24  
25 12 hospital transfer patterns are likely to vary depending on level of available neonatal  
26  
27 13 care and distance to transfer, we will include a mixture of hospitals with different  
28  
29 14 levels of neonatal care facilities in both rural and urban settings. We will include units  
30  
31 15 with Special Care Units (providing special care for their own local population), Local  
32  
33 16 Neonatal Units (providing special care and high dependency care and a restricted  
34  
35 17 volume of intensive care) and Neonatal Intensive Care Units (larger intensive care  
36  
37 18 units providing the whole range of medical, and sometimes surgical neonatal care for  
38  
39 19 their local population and for babies and their families referred from the neonatal  
40  
41 20 network in which they are based, and other networks when necessary). The hospitals  
42  
43 21 will be chosen from different geographical settings (rural/urban) and from different  
44  
45 22 regions of the UK.

46 23  
47  
48 24 If additional units wish to participate in the study we will consider including them, to  
49  
50 25 increase recruitment rates. The UK Reproductive Health and Childbirth specialty  
51  
52 26 group (clinical study group) have contributed to the study protocol and support the  
53  
54 27 proposed trial.  
55

56 28  
57  
58  
59  
60

## 1 Participant Selection And Enrolment

2 Women with signs and symptoms of preterm labour will be identified on presentation  
3 to obstetric services. A member of clinical staff, usually the doctor or midwife  
4 assessing the woman, will identify potentially eligible participants, provide a  
5 participant information leaflet and invite consent. A suitably trained member of clinical  
6 staff (doctor or midwife) or research team will consent participants.

7  
8 Posters and leaflets will be situated in antenatal areas of participating hospitals to  
9 alert women that the study is taking place, and women will be allowed as much time  
10 as possible to consider participation without unduly delaying further clinical  
11 assessment. Participants will receive adequate oral and written information and  
12 appropriate participant information and informed consent forms will be provided.

## 14 Screening For Eligibility

15 The clinical likelihood of preterm delivery is usually evaluated by history and  
16 examination, which includes abdominal palpation, to assess strength and frequency  
17 of uterine contractions. If preterm labour is suspected, a vaginal speculum  
18 examination is performed where the cervix is inspected for dilatation, and evidence of  
19 vaginal bleeding and membrane rupture assessed. Swabs for fFN are usually taken  
20 at this point. Potential participants in the QUIDS study will be identified after the initial  
21 assessment and provided with information about the study. A combined 'Screening  
22 and Consent Form' will be used as a self-screening tool for potentially eligible  
23 participants. Informed consent will take place before speculum examination and the  
24 fFN swab has been taken. This approach means that samples are collected at  
25 routine speculum examination, as they would be if fFN is implemented in clinical  
26 practice, and participants avoid an additional vaginal examination.

## 28 Ineligible And Non-Recruited Participants

1  
2  
3 1 Certain exclusion criteria can only be assessed at speculum examination (for  
4 2 example vaginal bleeding or evidence of ruptured membranes), so a proportion of  
5 3 women will not be eligible for fFN testing after consent is given. These women will  
6 4 still be enrolled and delivery outcomes collected. The decision whether to use this  
7 5 data for analysis will be the decision of the Chief Investigator and Statisticians.  
8  
9  
10  
11  
12  
13  
14  
15

#### 16 7 Withdrawal Of Study Participants

17 8 Women will be able to withdraw consent for us of their data at any time until the end  
18 9 of the study.  
19  
20  
21  
22

#### 23 11 Study Assessments (See Table 1)

##### 24 12 *Eligibility Assessment (Screening And Recruitment)*

25 13 Women presenting with signs and symptoms of pre-term labour will be identified on  
26 14 presentation to obstetric services. The doctor or midwife assessing the woman will  
27 15 identify potentially eligible participants and provide an invitation letter and short  
28 16 information leaflet.  
29  
30  
31  
32  
33  
34  
35

36 18 After the woman has had the opportunity to consider whether she would like to  
37 19 participate, she will be asked to complete the Screening and Consent Form. The  
38 20 clinician will then decide whether the fFN test can be carried out. If the test can be  
39 21 carried out (according to manufacturer's guidelines), then the participant will be fully  
40 22 enrolled and that their delivery outcomes will still be collected.  
41  
42  
43  
44  
45  
46  
47

48 24 If the woman declines to participate and she is willing to provide a reason for this, the  
49 25 reason given will be entered on to an anonymous log. Baseline demographics will be  
50 26 collected on consenting women, together with height and weight, information on  
51 27 medical history, obstetric history, estimated date of delivery together with the signs  
52 28 and symptoms they are presenting with.  
53  
54  
55  
56  
57  
58  
59  
60

1  
2  
3 1  
4  
5 2 The original consent form will be stored in the Investigator Site File (ISF) file, a copy  
6  
7 3 is given to the woman, a copy added to the medical notes and a copy sent to the  
8  
9 4 Trial Office.

10  
11 5  
12 6 After providing consent, the participant will be asked to complete a short State Trait  
13  
14 7 Anxiety Inventory (STAI) questionnaire and complete a contact details form. They will  
15  
16 8 also be issued with a letter thanking them for taking part in the trial and giving details  
17  
18 9 of the second questionnaire to be completed.

20  
21 10  
22  
23 11 *Sample Collection*

24  
25 12 Samples for analysis will be taken with a fFN specimen collection kit, which consists  
26  
27 13 of a sterile polyester tipped swab and a specimen transport tube containing 1 ml  
28  
29 14 extraction buffer (an aqueous solution containing protease inhibitors and protein  
30  
31 15 preservatives including aprotinin, bovine serum albumin, and sodium azide). During  
32  
33 16 speculum examination the sterile swab will be lightly rotated across the posterior  
34  
35 17 fornix of the vagina for ten seconds to absorb vaginal secretions. Samples should be  
36  
37 18 taken before any other swabs (e.g. for microbiology) or cervical manipulation and the  
38  
39 19 speculum lubricated with normal saline as other lubricants may interfere with the  
40  
41 20 antibody-antigen reaction of the test. Following specimen collection the swab should  
42  
43 21 be removed, immersed in extraction buffer, the shaft of the swab snapped off, and  
44  
45 22 the transport tube sealed.

46  
47 23  
48 24 Before analysis samples are gently mixed and as much liquid as possible expressed  
49  
50 25 from the swab by rolling the tip against the inside of the tube.

51  
52 26  
53  
54 27 *Initial fFN test*



1  
2  
3 1 The sample taken will be run at a near bedside Hologic Rapid fFN 10Q analyser,  
4  
5 2 specially adapted for the QUIDS study. As fFN (or other similar biochemical tests of  
6  
7 3 preterm labour) are part of standard care, it would be unethical to blind clinicians  
8  
9 4 from the qualitative fFN result. The analyser will thus reveal a qualitative fFN result  
10  
11 5 (positive/negative/invalid) for clinicians to base clinical decision-making on, according  
12  
13 6 to local protocols. The quantitative fFN result however, will be stored as a three-letter  
14  
15 7 code, blinding caregivers from the result. Samples will be run as per manufacturers  
16  
17 8 instructions (described above in the section "Health technologies being assessed").  
18  
19 9

#### 10 *Repeat fFN Tests*

11 If there is clinical indication for further fFN tests (eg because of ongoing symptoms of  
12 preterm labour after seven days), the results will also be recorded.  
13

#### 14 *Labour/Delivery/ Neonatal Assessments*

15 Admission for delivery will not be a formal study visit but data will be collected using  
16 information recorded in the participant's notes. Delivery data will be collected on the  
17 maternal outcomes of delivery, including method of delivery, indication for delivery  
18 method, onset of labour, date and gestation of delivery and blood loss.  
19

#### 20 *Questionnaires*

21 All participants who are eligible to participate will be asked to complete a STAI  
22 questionnaire before the speculum examination. The same questionnaire will be  
23 repeated 24-48 hours post examination. The second questionnaire will be provided  
24 on paper with a pre-paid envelope to be returned by post to the Trial Office. If not  
25 returned by post, the Trial Office may try to contact the participant (with the contact  
26 details provided), to complete the questionnaire over the phone.

| Visit                                                    | Attendance with signs and symptoms preterm labour |        |            |          |
|----------------------------------------------------------|---------------------------------------------------|--------|------------|----------|
|                                                          | Screening and Recruitment                         | 24-48h | 1-6 months | DELIVERY |
| Inclusion/Exclusion Criteria                             | ⊙                                                 |        |            |          |
| Participant Information Sheet                            | ⊙                                                 |        |            |          |
| Consent Form                                             | ⊙                                                 |        |            |          |
| Demographics                                             | ⊙                                                 |        |            |          |
| Obstetric History                                        | ⊙                                                 |        |            |          |
| Symptoms and Signs                                       | ⊙                                                 |        |            |          |
| Quantitative ffN                                         | ⊙                                                 |        |            |          |
| Cervical length scan (if available)                      | ⊙                                                 |        |            |          |
| State Trait Anxiety Inventory Questionnaire              | ⊙                                                 | ⊙      |            |          |
| Delivery details                                         |                                                   |        |            | ⊙        |
| Neonatal outcomes                                        |                                                   |        |            | ⊙        |
| Qualitative Acceptability Questionnaires (subgroup n=30) |                                                   |        | ⊙          |          |

Table 1: QUIDS Study Assessments

## 1 Safety and Quality Assessments

2 The Hologic Rapid fFN 10Q analyzer has integrated quality control measures, and  
3 we will keep records of these as well as any additional staff training that occurs after  
4 the study starts. It is recommended that a daily pre-calibrated reusable quality control  
5 cassette be inserted and analysed every 24 hours to verify that the analyser  
6 performance is within specification. A daily quality control (QC) should be performed  
7 if one has not been done in the preceding 24 hours before a patient test is to be  
8 done. Logs of results are stored on the machine and can be downloaded, and we will  
9 also ask the participating sites to keep a monthly paper log of QC tests done. Each  
10 patient test has an internal quality control, with a procedural control line that verifies  
11 the threshold level of signal by the instrument. Sample flow detection ensures the  
12 sample travels across the cassette properly, and confirms absence of conjugate  
13 aggregation. We believe that these measures will help ensure the validity of results.  
14 However, to provide further evidence of integrity and comparability of results from  
15 each site we will request that all participating sites enrol in the Wales External Quality  
16 Assurance Scheme (WEQAS) Point of Care Quality Assurance Scheme. WEQAS will  
17 provide a sample for analysis to each site bimonthly, and provide reports on analyser  
18 performance and variability.[8]

## 19 Data Collection

### 20 *Data For Prognostic Model Validation and Update of Health Economic Model*

21 We will collect data on all of the candidate predictors considered for inclusion in the  
22 prognostic model developed in the IPD meta-analysis. Outcome data will include  
23 gestational age at delivery, date and time of delivery, administration of treatments for  
24 preterm labour (steroids, antibiotics, tocolysis, magnesium sulphate) duration hospital  
25 admission, hospital transfer, onset of labour (preterm prelabour rupture of  
26 membranes; idiopathic preterm birth; medically indicated preterm birth [and  
27 indication]), place of delivery (base hospital, other hospital, outwith hospital), mode of  
28

1 delivery, neonatal admission, neonatal complications, perinatal mortality, congenital  
2 anomaly, sex and birthweight.

3  
4 Screening data and data about quantitative fFN testing will be collected on paper  
5 based CRFs and research midwives will input these into the web based electronic  
6 database. Clinical outcome data will be collected from the medical records.

### 7 8 *Maternal Acceptability and Anxiety*

9 Maternal anxiety will be measured pre and post-test (24-48h) using the validated  
10 State Trait Anxiety Inventory (STAI) questionnaire. Acceptability of fFN testing and  
11 the decision support will be assessed using follow up interviews (face to face or  
12 telephone, according to maternal preference) which will be conducted with a sub-  
13 group of participants (n=30) purposively sampled and stratified according to  
14 geographical location, outcome (preterm labour or not) and anxiety scores.  
15 Acceptability will also be assessed in a cohort of clinicians (n=30).

### 16 17 Statistics and Sample Size Calculation

18 Guidance for external validation suggests at least ten events (preterm delivery within  
19 seven days of test) are required for each covariate included in a prognostic  
20 model.[9,10] Data from the cohorts included in our IPD meta-analysis suggests an  
21 event rate of between 6 and 12%.[1] Based on these estimates a sample size of  
22 1,600 will provide 96 and 192 events (preterm delivery within 7 days).

23  
24 A UK study has shown that 8.9% of pregnant women present with symptoms of  
25 preterm labour and are eligible for quantitative fFN[11] and we anticipate 50%  
26 recruitment rate is achievable, thus overall 4.5% of maternities could be recruited.  
27 We will initially include eight units in the cohort study with a combined delivery rate of  
28 approximately 36,000 per annum. We anticipate that we will achieve target  
29 recruitment within 12 months ( $1 \text{ year} * 36,000 * 0.089 * 0.5 = 1,602$ ). If however, the

1 recruitment rate or event rate is lower than predicted, we will increase the number of  
2 sites included in the study and/or the recruitment period, to ensure that a minimum of  
3 60 events (preterm delivery within 7 days of test) are achieved, allowing for external  
4 validation of at least six covariates in our model.  
5

6 It is possible that the IPD meta-analysis will find there is potential added value of  
7 combining quantitative fFN testing with cervical length measurement.[12,13] As  
8 cervical length measurement has significant resource requirement (estimated NHS  
9 cost £68.16 per test) and lack of out of hours provision further limits availability in  
10 many NHS hospitals, we think it is very unlikely that cervical length scanning will  
11 improve performance of the prognostic model to such a degree as to make it cost  
12 effective. We will assess the incremental costs and effects of cervical length  
13 measurement in the proposed health economic model performed in parallel with the  
14 IPD meta-analysis, and will feed into design considerations during the first iteration of  
15 the prognostic model.  
16

17 If inclusion of cervical length ultrasound is found to be potentially cost-effective, we  
18 will assess the feasibility of including it in the prospective cohort study. We anticipate  
19 that including cervical length measurement in the prospective cohort study would be  
20 extremely difficult in the current NHS setting as the majority of units do not have 24  
21 hour availability of transvaginal ultrasound and/or trained personnel to perform scans.  
22 Inclusion of cervical length would also likely decrease recruitment rate (due to need  
23 for additional transvaginal ultrasound examination) and require significant additional  
24 resources.  
25

## 26 Analysis

### 27 *Validation Of Prognostic Model*

28 The prognostic model developed in the IPD will be externally validated using data  
29 collected in the prospective cohort data, using the measures of discrimination and

1 calibration described in QUIDS Protocol Part One,[1] including  $R^2$ , C statistic,  
2 calibration slope, calibration-in-the-large, and calibration plots of observed versus  
3 predicted risks across deciles (with Loess smoother). The average performance of  
4 the model will be summarised across the centers in the cohort study. Between-center  
5 heterogeneity in performance will also be summarised, and reduced (if necessary) by  
6 recalibration techniques regarding the strategy for the choice of baseline risk  
7 (intercept). That is, the predictor effects will not be modified from the IPD meta-  
8 analysis model, but the intercept may need to be tailored to improve validation in UK  
9 centers (e.g. for rural settings). Based on the findings, a final model and its  
10 implementation strategy will then be recommended for use.

### 12 *Economic Analysis*

13 The economic model will be refined, integrated and updated with data from the  
14 prospective study cohort, so as the most up to date and validated evidence is used to  
15 inform a cost-effectiveness decision. Such an iterative approach to economic  
16 evaluation is now well established.[14,15] The care pathway following diagnosis will  
17 be included in the economic analysis, using data from the cohort study such as the  
18 diagnostic test accuracy data, resource use data (i.e. steroid use, other medications,  
19 time in hospital, hospital transfer) and secondary outcome data (i.e., treatment of  
20 side-effects, morbidity, mortality) so as to capture the full costs and effect impacts  
21 (quality of life, morbidity and mortality) for both the mother and baby. Resource use  
22 data will be combined with unit cost information from the British National  
23 Formulary[16] and NHS reference costs.[17,18] Outcomes will be reported as the  
24 incremental cost per correct diagnosis, and incremental cost per Quality Adjusted  
25 Life Year (QALY) gained of the qfFN prognostic model compared to current practice  
26 (no qualitative fFN model). The analysis will adhere to the NICE reference case and  
27 the recommended guidelines for decision modeling and reporting of economic  
28 analyses.[18] Probabilistic sensitivity analysis will be undertaken to explore how  
29 uncertainty in the model inputs impact on the cost-effectiveness outcome.[19]

1           1    *Acceptability of fFN Testing and Effects on Anxiety*

2           2    Maternal anxiety will be measured before and after quantitative fFN testing using the  
3           3    validated STAI. The STAI Form Y is a widely used tool for measuring both temporary  
4           4    "state anxiety" and the more general, long-standing "trait anxiety". The STAI is  
5           5    designed for the self-reported assessment of the intensity of feelings of  
6           6    apprehension, tension, nervousness, and worry. STAI-Anxiety scores increase in  
7           7    response to physical danger and psychological stress, making it highly appropriate  
8           8    for this study. The use of STAI in pregnancy studies is discussed by Hundley, et al  
9           9    and we will interpret the results accordingly.[20]

10

11          11   The questionnaire will be administered prior to fFN testing (baseline) and 24-48  
12          12   hours after the test, to assess early reactions to the test and any acute anxiety  
13          13   prompted by the result of the test. We will also be able to assess any differences in  
14          14   those presented with a high risk or low risk result. Although it might be interesting to  
15          15   assess anxiety again in the latter stages of pregnancy, it is likely that, in this  
16          16   population, many pregnancies will not reach full term. Thus we believe our strategy of  
17          17   repeat questionnaire administration will allow measurement of longer term anxiety  
18          18   induced or alleviated by the test, whilst minimising bias due to preterm or term  
19          19   delivery itself or loss to follow up.

20

21          21   Follow up interviews will be performed with a sub-group of participants (n=30) to  
22          22   enable deeper exploration of women's views regarding fFN testing, to gain insight  
23          23   into the rationale for responses given in the questionnaires. Interviews will be  
24          24   conducted following confirmation of pregnancy status. Acceptability of the prognostic  
25          25   model will also be assessed with women and a group of clinicians. All interviews will  
26          26   be audio recorded with consent, and field notes taken to ensure an audit trail.

27

28          28   Decision Support

1 We will develop a decision support tool in accordance with the guidelines produced  
2 by the International Patient Decision Aid Standards (IPDAS) Collaboration.[21]  
3 Scoping of decisional requirements and how data should be presented was  
4 performed during focus group consultation as part of QUIDS Qualitative  
5 (Supplementary Material). A prototype decision support tool incorporating the initial  
6 prognostic model developed as part of the IPD-meta-analysis, will be tested with  
7 women and clinicians, as part of the acceptability studies described above. A final  
8 version will be updated with the validated (and, if necessary revised) prognostic  
9 model generated from the prospective cohort study. The multidisciplinary trial  
10 steering committee will oversee the development process, and decide how material  
11 is selected for inclusion.

## 13 **ETHICS AND DISSEMINATION**

### 14 **Trial Management And Oversight Arrangements**

#### 15 Project Management Group

16 The trial will be coordinated by a Project Management Group (PMG), consisting of  
17 the grant holders (Chief Investigator and Co-applicants), the trial manager,  
18 representatives from the Study Office and CHaRT (the supporting CTU), plus service  
19 user representatives (PAG). The PMG will meet approximately every four months by  
20 teleconference or face to face.

22 The Trial Manager based in Edinburgh will oversee the study and will be accountable  
23 to the Chief Investigator. The Trial Manager supported by the trial administrator(s)  
24 will take responsibility for the day-to-day transaction of study activities. They will be  
25 supported by the CTU at CHaRT to provide expertise and guidance. The Trial  
26 Manager will be responsible for checking the CRFs for completeness, plausibility and  
27 consistency. Any queries will be resolved by the Investigator or delegated member  
28 of the trial team.



1 A Delegation Log will be prepared for each site, detailing the responsibilities of each  
2 member of staff working on the trial.

3  
4 Trial Steering Committee and Data Monitoring Committee

5 A combined Trial Steering Committee and Data Monitoring Committee (TSC/DMC)  
6 will oversee the conduct and progress of the trial. The terms of reference of the  
7 Committee will be developed separately. Members of the TSC/DMC will consist of  
8 experts and two patient representatives.

### 10 **Good Clinical Practice**

11 The study will be conducted in accordance with the principles of Good Clinical  
12 Practice (GCP). A favorable ethical opinion has been obtained from the appropriate  
13 REC (reference 16/WS/0068) and local R&D approval will be obtained prior to  
14 commencement of the study at each site.

### 16 **Dissemination**

17 On completion of the study, the study data will be analysed and tabulated, and a  
18 clinical study report will be prepared in accordance with GCP guidelines. Results will  
19 be communicated to the academic community via the scientific literature, attendance  
20 at conferences and invited presentations. Summaries of results will also be made  
21 available to investigators for dissemination within clinics. Social media will be used to  
22 signpost publications and conference presentations and highlight important findings.  
23 Twitter and Facebook will be used to disseminate findings to professional  
24 organizations, charities, stakeholders and the public. Communication to the general  
25 public will further be facilitated by our close links with charities such as Tommy's.[22]

26  
27 We anticipate that the decision support will be made available as web based  
28 application that will be made freely available so clinicians can access it easily and it  
29 can be readily translatable into UK practice. If it is found to be effective in ruling out

1 preterm delivery, it is likely that it will decrease unnecessary costly, and potentially  
2 harmful treatments in women who have symptoms suggestive of preterm labour but  
3 do not deliver early.

4

#### 5 **PEER REVIEW**

6 The study was extensively peer reviewed as part of the process of gaining grant  
7 funding from the NIHR HTA (14/32/01).

8

#### 9 **FUNDING**

10 This project was funded by the National Institute of Healthcare Research Health  
11 Technology and Assessment (Reference 14/32/01). The views expressed are those  
12 of the authors and not necessarily those of the NHS, the NIHR or the Department of  
13 Health.

14

#### 15 **CONTRIBUTIONS TO AUTHORSHIP**

16 SJS, KB, RKM, JD, LJ, MC, AD, AK, AS, VHM, TL, KK, SHC, BM, RDR, JN and JEN  
17 developed the protocol. SJS, LW, RDR, KB, TL and JN drafted the protocol. RKM,  
18 JD, LJ, MC, AD, AK, AS, VHM, KK, SHC, BM and JEN reviewed and commented on  
19 the protocol.

20

#### 21 **COMPETING INTERESTS**

22 SJS and JEN work at the University of Edinburgh, who received £1000 sponsorship  
23 from Hologic to support a meeting (The Society of Reproductive Investigation and  
24 MRC Centre for Reproductive Health Scientific Symposium on Targeting  
25 Inflammation to Improve Reproductive Health across the Lifecourse – August 2017).  
26 AS has in the past (over last five years; not in the last three years) received funding  
27 for expenses related to advisory board and internal staff education from Hologic.

1 MC received sponsorship from Hologic to organise an educational teaching focusing  
2 on prediction of Preterm Birth at the 2017 annual meeting of the British Maternal and  
3 Fetal Medicine Society.

4 Hologic, the makers of fFN have provided analysers and technical support for their  
5 use to sites participating in the QUIDS prospective cohort study. They have no  
6 access to the data, or other involvement in the conduct, data analysis, interpretation  
7 of results or decision to publish the results of the study.

8

## 9 REFERENCES

- 10 1. Stock SJ, Wotherspoon L, Boyd K et al. Study Protocol: Quantitative Fibronectin to  
11 help Decision-making in women with Symptoms of Preterm Labour (QUIDS)  
12 Part One- Individual Patient Data Meta-analysis and Health Economic  
13 Analysis. *Submitted to BMJ Open alongside this manuscript(see*  
14 *supplementary information)*
- 15 2. Honest H, Forbes CA, Duree KH, et al. Screening to prevent spontaneous preterm  
16 birth: systematic reviews of accuracy and effectiveness literature with  
17 economic modelling. *Health Technol Assess* 2009;13(43):1-627
- 18 3. Deshpande SN, van Asselt AD, Tomini F, et al. Rapid fetal fibronectin testing to  
19 predict preterm birth in women with symptoms of premature labour: a  
20 systematic review and cost analysis. *Health Technol Assess* 2013;17(40):1-  
21 138
- 22 4. Roberts D, Brown J, Medley N, Dalziel SR. Antenatal corticosteroids for  
23 accelerating fetal lung maturation for women at risk of preterm birth.  
24 *Cochrane Database Syst Rev* 2017;3:CD004454
- 25 5. Office for National Statistics (2013). ONS gestation-Specific Infant Mortality in  
26 England and Wales 2011. Cardiff ONS, 2013. Also available at:  
27 <https://www.ons.gov.uk/peoplepopulationandcommunity/healthandsocialcare/>

- 1 causesofdeath/bulletins/pregnancyandethnicfactorsinfluencingbirthsandinfant  
2 mortality/2013-10-10 (accessed 23<sup>rd</sup> November 2017).  
3  
4  
5  
6 6. Information Services Division (2013). "Births in Scottish hospitals 2012". Edinburgh  
7 National Services Scotland, 2013. Also available at:  
8  
9  
10  
11  
12  
13  
14  
15  
16  
17  
18  
19  
20  
21  
22  
23  
24  
25  
26  
27  
28  
29  
30  
31  
32  
33  
34  
35  
36  
37  
38  
39  
40  
41  
42  
43  
44  
45  
46  
47  
48  
49  
50  
51  
52  
53  
54  
55  
56  
57  
58  
59  
60
6. Information Services Division (2013). "Births in Scottish hospitals 2012". Edinburgh National Services Scotland, 2013. Also available at: <http://www.isdscotland.org/Health-Topics/Maternity-and-Births/Publications/2013-08-27/2013-08-27-Births-Report.pdf?34511965514> (accessed 23<sup>rd</sup> November 2017).
  7. Macintyre-Beon C, Skeoch C, Jackson L, Booth P, Cameron A. Scottish Perinatal Collaborative Transport Study. NHS Quality Improvement Scotland 2008
  8. <http://www.weqas.com/services/poct-eqa/> (accessed 23<sup>rd</sup> November 2017).
  9. Vergouwe Y, Steyerberg EW, Eijkemans MJ, Habbema JD. Substantial effective sample sizes were required for external validation studies of predictive logistic regression models. *J Clin Epidemiol* 2005;58(5):475-83
  10. Vittinghoff E, McCulloch CE. Relaxing the rule of ten events per variable in logistic and Cox regression. *Am J Epidemiol* 2007;165(6):710-8
  11. Abbott DH, Seed PT, Bennett PR et al. EQUIPP: Evaluation of Fetal Fibronectin with a novel bedside Quantitative Instrument for the Prediction of Preterm birth. *Arch Dis Child Fetal Neonatal Ed* 2014;99:A150-A51
  12. van Baaren GJ, Vis JY, Wilms FF, et al. Predictive value of cervical length measurement and fibronectin testing in threatened preterm labor. *Obstet Gynecol* 2014;123(6):1185-92
  13. DeFranco EA, Lewis DF, Odibo AO. Improving the screening accuracy for preterm labor: is the combination of fetal fibronectin and cervical length in symptomatic patients a useful predictor of preterm birth? A systematic review. *Am J Obstet Gynecol* 2013;208(3):233 e1-6
  14. Ades AE, Sculpher M, Sutton A, et al. Bayesian methods for evidence synthesis in cost-effectiveness analysis. *Pharmacoeconomics* 2006;24(1):1-19

- 1 15. Sculpher MJ, Claxton K, Drummond M, McCabe C. Whither trial-based economic  
2 evaluation for health care decision making? Health Econom 2006;15(7):677-  
3 87  
4  
5  
6  
7 16. British National Formulary. BNF 73. 2017. .  
8  
9 17. Department of Health. Information Services Division. Scottish Health Service  
10 Costs Book 2012. 2012. Information Services Division.  
11  
12  
13 18. National Institute for Health and Care Excellence. Guide to the Methods of  
14 Technology Appraisal: 2013. 2013 National Institute for Health and Clinical  
15 Excellence.  
16  
17  
18  
19 19. Briggs AH. Handling uncertainty in cost-effectiveness models.  
20 Pharmacoeconomics 2000;17(5):479-500  
21  
22  
23 20. Hundley V, Gurney E, Graham W, Rennie AM. Can anxiety in pregnant women  
24 be measured using the State-Trait Anxiety Inventory. Midwifery  
25 1998;14(2):118-21  
26  
27  
28  
29 21. <http://ipdas.ohri.ca> (accessed 23rd November 2017)  
30  
31  
32 22. <https://www.tommys.org> (accessed 23rd November 2017)  
33  
34  
35  
36  
37  
38  
39  
40  
41  
42  
43  
44  
45  
46  
47  
48  
49  
50  
51  
52  
53  
54  
55  
56  
57  
58  
59  
60

**Figure 1**

QUIDS  
Part 1 [1]

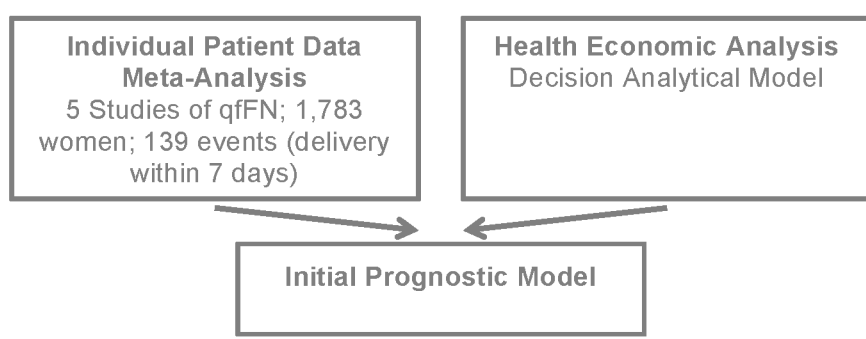

QUIDS  
Part 2

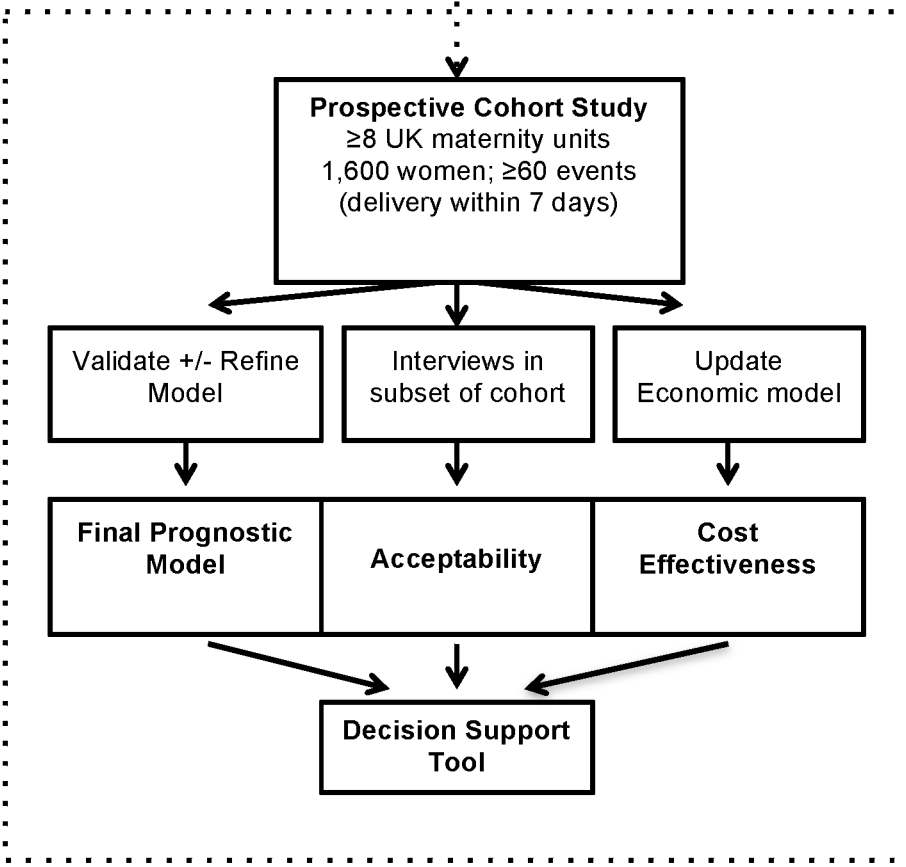

1  
2  
3  
4  
5  
6  
7  
8  
9  
10  
11  
12  
13  
14  
15  
16  
17  
18  
19  
20  
21  
22  
23  
24  
25  
26  
27  
28  
29  
30  
31  
32  
33  
34  
35  
36  
37  
38  
39  
40  
41  
42  
43  
44  
45  
46  
47  
48  
49  
50  
51  
52  
53  
54  
55  
56  
57  
58  
59  
60

**QUIDS Qualitative**

Quantitative Fibronectin to help Decision-making in women with Symptoms of Preterm Labour:  
determining decisional requirements

**Protocol**

(October 2015)

White H, O'Brien E, Hodgetts-Moreton V, Stock S, Lavender T

## Background

Preterm birth, defined as birth prior to 37 weeks gestation, occurs in 6-7% of pregnancies in Europe<sup>1</sup> and was recorded as 5.78% in England in 2013/14, equating to over 37,000 births.<sup>2</sup> Preterm birth is associated with a high risk of mortality, wide-ranging short- and long-term morbidities,<sup>3,4</sup> and significant economic costs to the NHS compared with birth at term.<sup>5</sup> Reducing the detrimental impact of preterm birth relies on the provision of timely and appropriate perinatal interventions. However, accurate prediction of preterm birth is challenging, even when the clinical symptoms are suggestive of preterm labour. In randomised trials approximately 80% of women diagnosed with preterm labour remained pregnant after 7 days.<sup>6,7</sup>

Interventions in preterm labour and preparations for preterm birth may include administration of corticosteroids to accelerate fetal lung maturation<sup>8,9</sup> and magnesium sulphate for fetal neuroprotection,<sup>10</sup> in utero transfer to a facility with appropriate maternity and neonatal services, and tocolysis to optimise time before birth to enable these.<sup>11</sup> Whilst such interventions can improve outcomes for mothers and babies who do experience preterm birth, they are not necessarily benign, especially for those in whom preterm birth does not occur.

The maximal beneficial impact of corticosteroids occurs with administration between 48 hours and seven days before birth, thus timing is especially important in optimising benefit for the neonate. For women who remain at risk of preterm birth after seven days of the initial dose, repeated doses reduce respiratory distress in the neonate<sup>9</sup> but have been found to be associated with a dose-dependent reduction in birthweight.<sup>12,13</sup> A five-year follow-up study of women who received repeated doses of antenatal corticosteroids due to risk of preterm birth found an increased risk of neurodevelopment impairment in infants born at term.<sup>14</sup> Therefore developing a strategy to establish the optimal time to give steroids is a research priority.



1  
2  
3 Magnesium sulphate administration immediately prior to birth has been shown to reduce cerebral  
4  
5 palsy,<sup>10</sup> but there is a risk of magnesium toxicity leading to respiratory depression in the mother and,  
6  
7 theoretically, the neonate.<sup>15</sup>  
8  
9

10 Whilst there is no clear beneficial effect of tocolytics on the incidence or outcome of preterm birth,<sup>16</sup>  
11  
12 their use is recommended if the days gained prior to preterm birth can be used appropriately, for  
13  
14 example transfer to a suitable maternity unit or the administration of drugs to protect the  
15  
16 neonate.<sup>11</sup> Tocolysis is linked with various maternal and neonatal complications,<sup>17</sup> hence the need  
17  
18 for therapy targeted only for those at risk of preterm birth and close monitoring of the mother and  
19  
20 fetus throughout.  
21  
22  
23

24  
25 Often, inpatient admission is recommended if preterm labour is suspected. Previous literature has  
26  
27 highlighted the social isolation and support needs that women with high-risk pregnancies who are  
28  
29 hospitalised experience.<sup>18</sup> In some cases, in-utero transfer is indicated to ensure that birth takes  
30  
31 place in a specialist unit with appropriate neonatal care facilities. This policy has been shown to  
32  
33 reduce mortality<sup>19,20</sup> and morbidity<sup>21</sup> in preterm neonates, especially those born very premature.  
34  
35 Qualitative research has indicated that women generally acknowledge the potential benefit of in  
36  
37 utero transfer to their baby and, hence, are willing to endure the inconvenience and upheaval that it  
38  
39 entails.<sup>22,23</sup> However, the experience is associated with an emotional, social and financial burden on  
40  
41 women and their families, especially for the substantial proportion of women who do not deliver  
42  
43 prematurely following in utero transfer. When describing their experiences of in utero transfer,  
44  
45 women expressed shock at the prospect of the transfer, feeling socially isolated, and having no  
46  
47 control over the situation, in addition to the practical difficulties experienced particularly by women  
48  
49 who already had children.<sup>22,24,25</sup> In a large survey of women who had experienced in utero transfer,  
50  
51 over a quarter lamented the financial cost<sup>24</sup> particularly with respect to their partner's outlay for  
52  
53 travel, food, accommodation, and phone bills, exacerbated with requiring time off work.<sup>22</sup>  
54  
55  
56  
57

58 Furthermore, in utero transfer is costly to maternity services. Securing a maternal and neonatal bed  
59  
60

1  
2  
3 in another unit is a time-consuming task that often falls to delivery suite midwives to arrange, whilst  
4 also continuing to provide care to the woman.<sup>26</sup> In a large observational study of all in utero  
5 transfers that took place in Scotland in a six-month period, nearly one third of all transfers were due  
6 to threatened preterm labour.<sup>27</sup> Under half of the women transferred from one consultant-led unit  
7 to another gave birth within 48 hours.<sup>27</sup> Such unnecessary transfers are costly to women, their  
8 families and maternity services. Qualitative research into women's experiences of preterm labour  
9 have highlighted the need for caregivers to create an environment where women are enabled to  
10 discuss their fears<sup>28</sup> and exert control over how they manage their preterm labour care.<sup>25</sup>  
11  
12  
13  
14  
15  
16  
17  
18  
19  
20  
21  
22  
23  
24

25 Accurate prediction of preterm birth could reduce the burdens and risks associated with  
26 unnecessary interventions, and enable women and their clinicians to make informed decisions  
27 regarding their care. Numerous diagnostic tests have been used in preterm labour, including  
28 biochemical tests of vaginal secretions and cervical length.<sup>29</sup> One such test is fetal fibronectin, a  
29 near-bedside test that provides a positive or negative result and has excellent negative predictive  
30 value.<sup>30</sup> Thus fetal fibronectin can identify which women will not benefit and may be put at risk by  
31 the interventions described previously, and reduce costs to maternity services.<sup>31</sup> Developments in  
32 fetal fibronectin testing have led to a quantitative test that provides a concentration of fetal  
33 fibronectin in vaginal secretions, giving women and clinicians more information on which to base  
34 their management decisions.<sup>32</sup>  
35  
36  
37  
38  
39  
40  
41  
42  
43  
44  
45  
46  
47  
48  
49  
50

51 Qualitative evidence has indicated that women feel a sense of increased responsibility to their  
52 babies and themselves during a high risk pregnancy, such as threatened preterm labour.<sup>33</sup> Women  
53 want to be involved in decision making about their care to different degrees and feel most satisfied  
54 when their caregiver supports them to make decisions in the way they felt most comfortable.<sup>33</sup>  
55  
56  
57  
58  
59  
60

1  
2  
3 Previous literature on decision making and preterm birth has focussed on diagnostic tests<sup>6,28-32,34</sup> and  
4 the care of the preterm infant.<sup>35,36</sup> To date, there has been no investigation of what women, their  
5 partners and caregivers would like to know in order to make informed decisions about the care that  
6 is provided following the signs and symptoms of preterm labour.  
7  
8  
9  
10  
11  
12  
13  
14  
15

16 Funding has been received from the National Institute for Health Research Health Technology  
17 Assessment Programme for a large, multicentre trial to develop a mobile application decision  
18 support tool for the management of women with symptoms and signs of preterm labour, based on a  
19 validated model using quantitative fetal fibronectin testing. This study is the precursor to that trial,  
20 with the aim of determining the decisional needs of pregnant women with the symptoms and signs  
21 of preterm labour, their families and caregivers, using a qualitative framework approach. The  
22 outcomes of this qualitative study will inform the development of the mobile application decision  
23 support tool, using the findings from an individual patient data meta-analysis. The tool will then be  
24 externally validated and refined in the multi-centre trial, QUIDS.  
25  
26  
27  
28  
29  
30  
31  
32  
33  
34  
35  
36  
37  
38  
39  
40  
41  
42  
43  
44  
45  
46  
47  
48  
49  
50  
51  
52  
53  
54  
55  
56  
57  
58  
59  
60

## Methods

A qualitative framework approach will be used, based on data collected from focus groups and semi-structured telephone interviews.

## Setting

Focus groups will take place in three maternity units: Liverpool Women's NHS Foundation Trust, Birmingham Women's NHS Foundation Trust and Royal Edinburgh Hospital, NHS Lothian. There will be focus groups for women and a separate focus group for partners. Clinicians who care for women with threatened preterm birth will be interviewed by telephone.

## Sample

A purposive sample of women and partners will be recruited to cover a variety of experiences of preterm labour and birth. Women will be stratified by their prior experience and relevant characteristics, including ethnicity, previous obstetric history, living in an urban or rural setting and proximity to a tertiary neonatal referral centre. Two focus groups of 4–8 women will be conducted at each site; one for pregnant women who are at high risk of preterm birth, and one for postnatal women who have recently experienced preterm birth. One partners' focus group will be conducted at one of the sites. If women or partners are unable to attend a focus group but still wish to participate, a semi-structured telephone interview will be offered.

Up to 10 obstetricians, including trainees, midwives, and neonatologists will be purposefully recruited to cover a range of professional backgrounds and experience. Semi-structured telephone interviews will be used to collect the data.

## Eligibility

### *Principal inclusion criteria for women's antenatal focus groups*

Women who are currently pregnant who:

- Have previously experienced preterm birth following preterm labour,
- Have experienced threatened preterm labour in this pregnancy,
- Are at high risk of preterm birth for another clinical reason, such as prior cervical surgery.

### *Principal inclusion criteria for women's postnatal focus groups*

Women who have experienced preterm birth following preterm labour at <34 weeks whose babies **are stable and well** and are receiving care on the special care baby unit or neonatal intensive care unit.

### *Principal inclusion criteria for partners' focus groups*

Partners of women who fit the eligibility criteria for either focus group.

### *Principal exclusion criteria for the focus groups*

Non-English speaking individuals.

### *Principal inclusion criteria for clinician interviews*

Clinicians who care for pregnant women i.e. obstetricians (including trainees), neonatologists and midwives.

### *Principal exclusion criteria for clinician interviews*

1  
2  
3 Researchers in QUIDS or QUIDS qualitative.  
4  
5  
6  
7  
8

## 9 **Recruitment**

### 10 *Women and partners*

11  
12  
13  
14  
15 Eligible women will be identified by clinicians in the preterm birth clinic and other antenatal clinics,  
16  
17 and antenatal, triage or labour wards (for the antenatal focus groups) and the special care baby unit  
18  
19 or postnatal clinics (for the postnatal focus groups) at each site. Eligible partners will be identified by  
20  
21 the same method. Clinicians who are aware of and understand the research aims will approach  
22  
23 women and partners to request consent for a researcher to contact them. Importantly, only  
24  
25 postnatal parents whose babies are being cared for on the SCBU who are considered stable and well  
26  
27 by the clinicians will be approached. With consent the researcher will make contact to talk to the  
28  
29 women and/or their partners about the research, either face-to-face or over the telephone.  
30  
31

32  
33 Potential participants will be given the participant information sheet (PIS) (appendix \_) that is  
34  
35 relevant to them and given verbal information about the study. Each participant will be given time to  
36  
37 read the information and the opportunity to have any questions answered. Willing participants will  
38  
39 be asked to provide their written consent prior to the focus groups.  
40  
41  
42  
43  
44  
45

### 46 *Clinicians*

47  
48  
49 Eligible clinicians will be approached by the researchers, via email or face-to-face. Clinicians will be  
50  
51 given the clinician PIS (appendix \_) and the opportunity to read the information and have any  
52  
53 questions answered. Willing clinicians will be asked to provide their written consent prior to the  
54  
55 interviews.  
56  
57  
58  
59  
60

1  
2  
3 All participants (women, partners and clinicians) will be reassured that they are not compelled to  
4 participate, that they can withdraw from the study at any time, and that non-participation will not  
5 affect their care or employment in any way.  
6  
7  
8  
9

### 10 11 12 13 **Data collection**

14  
15  
16 The primary aim of this research is to determine the decisional requirements of women, their  
17 partners and clinicians for the management of preterm labour. Qualitative semi-structured  
18 interviews, in a focus-group setting or individual telephone interviews, provide a means of collecting  
19 rich, in-depth data with a specific focus.<sup>37</sup> Hence, structured topic guides will be used to initiate and  
20 concentrate the discussion (appendices 7–10).  
21  
22  
23  
24  
25  
26  
27

28  
29 Focus groups are the preferred format for eliciting the view of women and women's partners.

30  
31 Encouraging discussion among a homogenous group with a shared interest is likely to provide rich  
32 insight and understanding into the group's experiences, beliefs and norms as a result of their social  
33 interaction.<sup>38</sup> Conversely, interviewing clinicians individually avoids the potential pitfall of  
34 professional embarrassment stifling ideas in a group setting. Interviewing individual clinicians with a  
35 range of professional experience should ensure that the decisional requirements of clinicians at all  
36 levels of experience are understood.  
37  
38  
39  
40  
41  
42  
43  
44  
45  
46  
47

48  
49 Demographic details and baseline characteristics will be collected prior to the interviews, either as a  
50 self-completion questionnaire, or questions asked by the researcher over the telephone. All  
51 interviews will be audio recorded, with the participants' consent, and field notes taken. The focus  
52 groups will be facilitated by at least two researchers. This is to ensure that all pre-specified areas of  
53 interest are covered and that non-verbal communication and group interactions are documented  
54 within the field-notes, which will provide context for the data analysis. Recapping will be used to  
55  
56  
57  
58  
59  
60

clarify aspects and avoid misinterpretation. To enable all participants to talk freely, the researchers will be unknown to the participants and not working clinically in the unit where the interview is conducted. Clinicians will be interviewed by a researcher who is unknown to them.

|                                  | Site       | Interviewers |
|----------------------------------|------------|--------------|
| Women and partners' focus groups | Liverpool  | HW and EO    |
|                                  | Birmingham | HW and VH-M  |
|                                  | Edinburgh  | HW and LM    |
| Clinician interviews             | Telephone  | HW (and EO?) |

### Analysis plan

A framework approach to data analysis will be used. This approach was developed to manage and interpret large volumes of data collected to inform health policy, meaning they had focussed aims and objectives.<sup>37</sup> Likewise, this research has clear aims, as described previously, in addition to the methodological aim of collecting rich data about the experiences and beliefs of women, their partners and clinicians in relation to managing preterm labour.

Framework analysis follows specific, clearly documented stages of analysis that are transparent so that others can review the interpretation processes and understand how the findings were reached.<sup>39</sup> Transparency is particularly important in this study as the findings will inform the development of an application to aid management decisions in clinical practice. Following verbatim transcription of the interview recordings, the researchers will become familiar with the data by reading the transcripts and field-notes several times. The next stage is to develop a theoretical framework by re-reading the transcripts and making notes as recurring characteristics are



1  
2  
3 recognised. The characteristics will then be collated into themes, which are based on the text itself,  
4 supported by the field-notes. The resulting thematic framework will be applied back to the  
5 transcripts and field-notes to check that it reflects the context of the original data. The transcripts  
6 will be coded, so that portions of text are linked to a discrete theme. A sample of transcripts will be  
7 independently coded by two people. The data will be charted and indexed to identify the preterm  
8 labour or professional experience of the participant, thus enabling the attribution of themes to a  
9 particular group. Finally, the content of the charts will be interpreted and mapped against each  
10 other to devise themes and sub-themes categories. Once again, this will involve review of the  
11 original data. Explanatory accounts will be developed to clarify the data and quotable sections of  
12 data will be identified. The final categories will be discussed between the researchers until  
13 consensus is met. The researchers will maintain reflexive journals throughout the data collection and  
14 analysis stages, recognising and ameliorating, as far as possible, the fact that their presence and  
15 assumptions impact on the data and the findings.<sup>40</sup>

16  
17 This method of data analysis creates a clear audit trail thus ensuring rigour. Each stage of analysis  
18 refers back to the original data so that context and meaning is not lost in the final framework of  
19 themes and subthemes. The data analysis process will be managed using NVivo software, a  
20 qualitative data analysis tool.

### 21 22 23 24 25 26 27 28 29 30 31 32 33 34 35 36 37 38 39 40 41 42 43 44 45 46 **Participant withdrawal**

47  
48  
49 Participants may withdraw from the study at any point. However, they will not be able to withdraw  
50 use of their data once the prognostic tool is developed.  
51  
52  
53  
54  
55  
56  
57  
58  
59  
60

## Safety

The physical safety of participants will be ensured through adhering to the health and safety policies of the host units where the focus groups take place.

The emotional wellbeing of the participants will be safeguarded by following the Distress Policy (see appendix 11). The Supervisors of Midwives (SOM) team in each unit will be informed of the study and women and their partners will be given the SOM team contact details, should they become distressed or upset as a result of talking about their experiences. Participants will also be given the contact details for accessing local counselling services.

## Good clinical practice

### *Informed consent*

All participants will be fully informed about the study and the subsequent QUIDS trial via verbal and written communication. All eligible individuals will be given the participant information sheet (appendix \_\_) and provided with an opportunity to have any questions answered. Written consent will then be gained prior to the commencement of the focus groups/interviews.

### *Confidentiality*

Demographic information will be collected from participants to attribute themes from the data to particular groups within the analysis and dissemination of findings. Demographic information, which will contain potentially identifiable information, will be kept in a secure lockable cabinet. Audio recordings will be stored on an encryptable audio device only until they are transcribed. Once transcribed the audio recordings will be deleted. Transcription services are provided by '1<sup>st</sup> Class Secretarial', who subscribe to the Data Protection Act and have also signed the Code of Practice on Data Handling. Hard copies of audio transcripts and field-notes will be kept in a separate secure

1  
2  
3 lockable cabinet to the demographic information. The transcripts and field-notes will be coded to  
4  
5 identify which participant provided that data; the codes will only be known by the researchers.

6  
7 Participant's data will not be used for any purpose other than this study and the subsequent QUIDS  
8  
9 trial.

### 10 11 12 13 *Data Protection*

14  
15  
16 Participants will be informed that publications from this study will contain direct quotes from the  
17  
18 focus groups/interviews and categorisation of their experience of preterm labour (e.g. experienced  
19  
20 preterm birth), which could enable personal identification.

21  
22  
23 All researchers involved in this study must comply with the requirements of the Data Protection Act  
24  
25 1998 with regard to the collection, storage, processing and disclosure of personal information and  
26  
27 uphold the Act's core principles. All computers used for processing data are password protected and  
28  
29 subject to the strict data protection policies of the researcher's institution.

### 30 31 32 33 *Good clinical practice training*

34  
35  
36 All researchers involved in this study must hold evidence of recent Good Clinical Practice training.  
37  
38  
39  
40  
41

### 42 43 **Additional ethical considerations**

#### 44 45 *Expenses and reimbursement*

46  
47  
48 Participants will be reimbursed for all out of pocket expenses, for example travelling to the interview  
49  
50 site. Participants will be informed of this and how to apply for expenses reimbursement, including  
51  
52 keeping receipts for travel.  
53  
54  
55  
56  
57  
58  
59  
60

### *Safety of researchers*

An individualised risk assessment will be conducted to identify any risks to researchers or participants involved in this study. The lone working policy of the institution will be adhered to at all times. The only anticipated lone working will be during travel to and from the interview sites.

The lone working policy of the researcher's institutions mandates that researchers wear a GPS tracking and audio transmitting device during all lone-working, off-site research activity with participants. Participants will be informed if this device is being used.

### **Insurance / Indemnity**

The researcher's institution holds public liability insurance and professional indemnity insurance (appendices 12, 13 and 14).

### **Timeline**

The anticipated start date for the focus groups and interviews is 1<sup>st</sup> January 2016, to be completed within 3 months.

1  
2  
3 **Appendices**  
4

5  
6 **Appendix 1: PIS women**  
7

8  
9 **Appendix 2: PIS partners**  
10

11  
12 **Appendix 3: PIS clinicians**  
13

14  
15 **Appendix 4: Consent form women**  
16

17  
18 **Appendix 5: consent form partners**  
19

20  
21 **Appendix 6: consent form clinicians**  
22

23  
24 **Appendix 7: Interview schedule AN women**  
25

26  
27 **Appendix 8: Interview schedule PN women**  
28

29  
30 **Appendix 9: Interview schedule partners**  
31

32  
33 **Appendix 10: Interview schedule clinicians**  
34  
35  
36  
37  
38  
39  
40  
41  
42  
43  
44  
45  
46  
47  
48  
49  
50  
51  
52  
53  
54  
55  
56  
57  
58  
59  
60

For peer review only

## Appendix 11: Distress policy

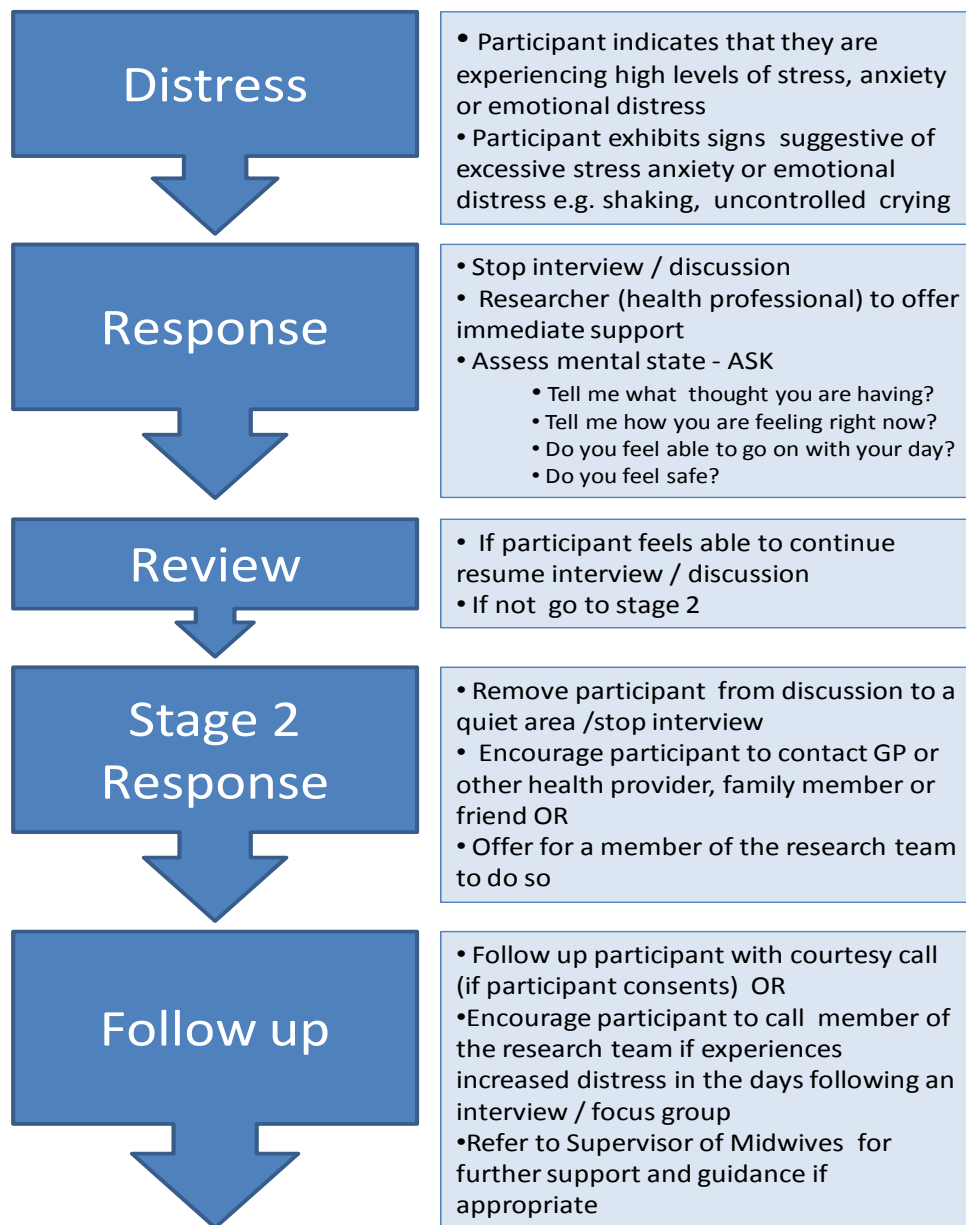

Adapted from Haigh and Witham (2010)<sup>41</sup>

1  
2  
3 **Appendix 12: Public Liability insurance**  
4  
5  
6  
7  
8  
9  
10  
11  
12  
13  
14  
15  
16  
17  
18  
19  
20  
21  
22  
23  
24  
25  
26  
27  
28  
29  
30  
31  
32  
33  
34  
35  
36  
37  
38  
39  
40  
41  
42  
43  
44  
45  
46  
47  
48  
49  
50  
51  
52  
53  
54  
55  
56  
57  
58  
59  
60

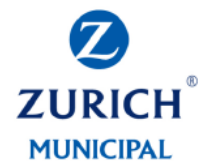

To Whom It May Concern

Our ref: SP/IND

3 June, 2015

Zurich Municipal Customer: The University of Manchester

This is to confirm that The University of Manchester have in force with this Company Public Liability Insurance until the policy expiry on 31 May 2016:

**Policy Number:** NHE-07CA03-0013

**Limit of Indemnity:** £ 50,000,000 any one claim

**Excess:** Nil any one claim

Zurich Municipal  
Zurich House  
2 Gladiator Way  
Farnborough  
Hampshire  
GU14 6GB

Telephone 0870 2418050  
Direct Phone 01252 387859  
Direct Fax 01252 375893  
E-mail alison.cliff@uk.zurich.com

Communications will be monitored regularly to improve our service and for security and regulatory purposes

Zurich Municipal is a trading name of Zurich Insurance Group Ltd

A public limited company incorporated in Ireland. Registration No. 13460  
Registered Office: Zurich House, Ballsbridge Park, Dublin 4, Ireland.

UK branch registered in England and Wales  
Registration No. BR7985.  
UK Branch Head Office: The Zurich Centre,  
3000 Parkway, Whiteley, Fareham, Hampshire  
PO15 7JZ

Authorised by the Central Bank of Ireland and subject to limited regulation by the Financial Conduct Authority. Details about the extent of our regulation by the Financial Conduct Authority are available from us on request.

Yours faithfully

A handwritten signature in black ink, appearing to read 'Nigel Smith'.

Underwriting Services  
Zurich Municipal  
Farnborough

Appendix 13: Employers' Liability insurance

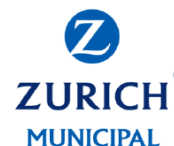

Certificate of Employers' Liability Insurance(a)

(Where required by regulation 5 of the Employers' Liability (Compulsory Insurance) Regulations 2008 (the Regulations), a copy of this certificate must be displayed at all places where you employ persons covered by the policy or an electronic copy of the certificate must be retained and be reasonably accessible to each employee to whom it relates).

Policy No. NHE-07CA03-0013  
 1. Name of policyholder The University of Manchester  
 2. Date of commencement of insurance policy 01 June 2015  
 3. Date of expiry of insurance policy 31 May 2016

We hereby certify that subject to paragraph 2:

1. The policy to which this certificate relates satisfies the requirements of the relevant law applicable in Great Britain, Northern Ireland, the Isle of Man, the Island of Jersey, the Island of Guernsey and the Island of Alderney (b)
2. (a) the minimum amount of cover provided by this policy is no less than £5 million (c)

Signed on behalf of Zurich Insurance plc (Authorised Insurer).

Signature

Stephen Lewis

Chief Executive Officer, Zurich Insurance plc (UK Branch)

Zurich Municipal is a trading name of Zurich Insurance plc  
 A public limited company incorporated in Ireland  
 Registration No. 13460 Registered Office Zurich House, Ballsbridge Park, Dublin 4 Ireland.  
 UK branch registered in England and Wales Registration No. BR 7985  
 UK Branch Head Office The Zurich Centre, 3000 Parkway, Whiteley, Fareham, Hampshire PO15 7TZ

Notes

- (a) Where the employer is a company to which regulation 3(2) of the Regulations applies, the certificate shall state in a prominent place, either that the policy covers the holding company and all its subsidiaries, or that the policy covers the holding company and all its subsidiaries except any specifically excluded by name, or that the policy covers the holding company and only the named subsidiaries.
- (b) Specify applicable law as provided for in regulation 4(6) of the Regulations.
- (c) See regulation 3(1) of the Regulations and delete whichever of paragraphs 2(a) or 2(b) does not apply. Where 2(b) is applicable, specify the amount of cover provided by the relevant policy

Authorised by the Central Bank of Ireland and subject to limited regulation by the Financial Conduct Authority. Details about the extent of our regulation by the Financial Conduct Authority are available from us on request



1  
2  
3 **Appendix 14: Professional indemnity insurance**  
4  
5  
6  
7  
8  
9

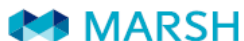

Cliffe Crowther  
Marsh Ltd  
Belvedere  
12 Booth Street  
Manchester  
M2 4AW  
+44 (0) 161 954 7317  
Fax +44 (0) 161 954 7210  
Cliffe.crowther@marsh.com  
www.marsh.com

16 **To whom it may concern**  
17  
18  
19  
20  
21

22 29<sup>th</sup> May 2015  
23  
24  
25

26 Dear Sirs,  
27

28 **CONFIRMATION OF INSURANCE – The University of Manchester and Subsidiary  
29 Companies**

30 As requested by the above client, we are writing to confirm that we act as Insurance Brokers to  
31 the client and that we have arranged insurance(s) on its behalf as detailed below:  
32

33 **PROFESSIONAL INDEMNITY INSURANCE**

|                        |                                                                                                                                               |
|------------------------|-----------------------------------------------------------------------------------------------------------------------------------------------|
| 34 INSURERS            | Novae Underwriting Ltd.                                                                                                                       |
| 35 POLICY NUMBER       | 003210MMA15C                                                                                                                                  |
| 36 PERIOD OF INSURANCE | 01 June 2015 to 31 <sup>st</sup> May 2016, both dates inclusive.                                                                              |
| 37 LIMIT OF INDEMNITY  | GBP10,000,000 any one claim and in the aggregate any one<br>38 insurance period plus costs and expenses.                                      |
| 39 DEDUCTIBLE          | GBP20,000 each & every claim including costs and expenses<br>40<br>41<br>42<br>43<br>44<br>45<br>46<br>47<br>48<br>49<br>50<br>51<br>52<br>53 |

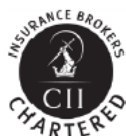

Registered in England Number: 1507274, Registered Office:  
1 Tower Place West, Tower Place, London EC3R 5BU.  
Marsh Ltd is authorised and regulated by the Financial Conduct  
Authority

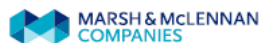

V 1.3  
21/10/15

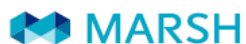

Page 2  
29<sup>th</sup> of May 2015

We have placed the insurance which is the subject of this letter after consultation with the client and based upon the client's instructions only. Terms of coverage, including limits and deductibles, are based upon information furnished to us by the client, which information we have not independently verified.

This letter is issued as a matter of information only and confers no right upon you other than those provided by the policy. This letter does not amend, extend or alter the coverage afforded by the policies described herein. Notwithstanding any requirement, term or condition of any contract or other document with respect to which this letter may be issued or pertain, the insurance afforded by the policy (policies) described herein is subject to all terms, conditions, limitations, exclusions and cancellation provisions and may also be subject to warranties. Limits shown may have been reduced by paid claims.

We express no view and assume no liability with respect to the solvency or future ability to pay of any of the insurance companies which have issued the insurance(s).

We assume no obligation to advise yourselves of any developments regarding the insurance(s) subsequent to the date hereof. This letter is given on the condition that you forever waive any liability against us based upon the placement of the insurance(s) and/or the statements made herein with the exception only of wilful default, recklessness or fraud.

This letter may not be reproduced by you or used for any other purpose without our prior written consent.

This letter shall be governed by and shall be construed in accordance with English law.

Yours faithfully

Cliffe Crowther

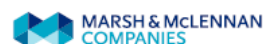

V 1.3  
21/10/15

## References

1. Beck S, Wojdyla D, Say L, *et al*. The worldwide incidence of preterm birth: a systematic review of maternal mortality and morbidity. *Bull World Health Organ* 2010;88:31–38. doi:10.2471/BLT.08.062554.
2. Health and Social Care Information Centre. *Hospital Episode Statistics: NHS Maternity statistics — England, 2013–14*. Leeds, HSIC.
3. Saigal S, Doyle LW. An overview of mortality and sequelae of preterm birth from infancy to adulthood. *Lancet* 2008;371:261–9.
4. D’Onofrio BM, Class QA, Rickert ME, *et al*. Preterm birth and mortality and morbidity: a population-based quasi-experimental study. *JAMA Psychiatry* 2013; 70(11):1231-1240. doi:10.1001/jamapsychiatry.2013.2107 .
5. Mangham LJ, Petrou S, Doyle LW, *et al*. The cost of preterm birth throughout childhood in England and Wales. *Pediatrics* 2009;123(2):e312–27. doi: 10.1542/peds.2008-1827.
6. Alfirevic Z, Allen-Coward H, Molina F, *et al*. Targeted therapy for threatened preterm labor based on sonographic measurement of the cervical length: a randomized controlled trial. *Ultrasound Obstet Gynecol* 2007;29:47–50. DOI: 10.1002/uog.3908.
7. Salim R, Garmi G, Nachum Z, *et al*. Nifedipine compared with atosiban for treating preterm labor: a randomized controlled trial. *Obstet Gynecol* 2012;120:1323–31. DOI:10.1097/AOG.0b013e3182755dff
8. Roberts D, Dalziel SR. Antenatal corticosteroids for accelerating fetal lung maturation for women at risk of preterm birth. *Cochrane Database of Systematic Reviews* 2006, Issue 3. Art. No.: CD004454. DOI: 10.1002/14651858.CD004454.pub2.
9. Crowther CA, McKinlay CJD, Middleton P, Harding JE. Repeat doses of prenatal corticosteroids for women at risk of preterm birth for improving neonatal health outcomes.

- 1  
2  
3  
4  
5  
6  
7  
8  
9  
10  
11  
12  
13  
14  
15  
16  
17  
18  
19  
20  
21  
22  
23  
24  
25  
26  
27  
28  
29  
30  
31  
32  
33  
34  
35  
36  
37  
38  
39  
40  
41  
42  
43  
44  
45  
46  
47  
48  
49  
50  
51  
52  
53  
54  
55  
56  
57  
58  
59  
60
- Cochrane Database of Systematic Reviews* 2015, Issue 7. Art. No.: CD003935. DOI:  
10.1002/14651858.CD003935.pub4.
10. Doyle LW, Crowther CA, Middleton P, Marret S, Rouse D. Magnesium sulphate for women at risk of preterm birth for neuroprotection of the fetus. *Cochrane Database of Systematic Reviews* 2009, Issue 1. Art. No.: CD004661. DOI:10.1002/14651858.CD004661.pub3.
11. Royal College of Obstetricians and Gynaecologists. *Tocolysis for women in preterm labour: Green-top Guideline No. 1b*. 2011. London: RCOG.
12. Murphy KE, Hannah ME, Willan AR, Hewson SA, Ohlsson A, Kelly EN, Matthews SG, Saigal S, Asztalos E, Ross S, Delisle M-F, Amankwah K, Guselle P, Gafni A, Lee SK, Armson BA, for the MACS Collaborative Group. Multiple courses of antenatal corticosteroids for preterm birth (MACS): a randomised controlled trial. *Lancet* 2008; 372: 2143–51.
13. Norberg H, Stålnacke J, Diaz Heijtz R, Smedler A-C, Nyman M, Forssberg H, Norman M. Antenatal corticosteroids for preterm birth: dose-dependent reduction in birthweight, length and head circumference. *Acta Paediatrica* 2011;100:364–9.
14. Asztalos E, Willan A, Murphy K, Matthews S, Ohlsson A, Saigal S, Armson A, Kelly E, Delisle M-F, Gafni A, Lee S, Sananes R, Rovet J, Guselle P, Amankwah K, for the MACS-5 Collaborative Group. Association between gestational age at birth, antenatal corticosteroids, and outcomes at 5 years: multiple courses of antenatal corticosteroids for preterm birth study at 5 years of age (MACS-5). *BMC Pregnancy and Childbirth* 2014; 14:272.
15. Jacquemyn Y, Zecic A, Van Laere D, Roelens K. The use of intravenous magnesium in non-preeclamptic pregnant women: fetal/neonatal neuroprotection. *Arch Gynecol Obstet* 2015;291:969–975.
16. Gyetvai K, Hannah ME, Ellen D, Hodnett ED, Ohlsson A. Tocolytics for preterm labour: a systematic review. *Obstetrics and Gynecology* 1999;94(5):869–77.
17. Hill WC. Risks and complications of tocolysis. *Clinical Obstetrics and Gynecology* 1995;38(4):725–45.

- 1  
2  
3 18. Kent RA, Yazbek M, Heyns T, et al. The support needs of high-risk antenatal patients in  
4 prolonged hospitalisation. *Midwifery* 2015;31:164–9.  
5  
6  
7  
8 19. Lasswell SM, Barfield WD, Rochat RW, Blackmon L. Perinatal Regionalization for Very Low-  
9 Birth-Weight and Very Preterm Infants: A Meta-analysis. *JAMA*. 2010;304(9):992-1000.  
10 doi:10.1001/jama.2010.1226.  
11  
12  
13  
14 20. Marlow N, Bennett C, Drasper ES, Hennessy EM, Morgan AS, Costeloe KL. Perinatal  
15 outcomes for extremely preterm babies in relation to place of birth in England: The EPICure  
16 2 study. *Arch Dis Child Fetal Neonatal Ed* 2014;99:F181–88.  
17  
18  
19  
20 21. Towers TV, Bonebrake R, Padilla G, Rumney P. The effect of transport on the rate of severe  
21 intraventricular hemorrhage in very low birth weight infants. *Obstetrics and Gynecology*  
22 2000;95(2):291–295.  
23  
24  
25  
26 22. Porcellato L, Masson G, O’Mahony F, Jenkinson S, Vanner T, Cheshire K, Perkins E. ‘It’s  
27 something you have to put up with’— service users’ experiences of in utero transfer: a  
28 qualitative study. *BJOG* 2015; DOI: 10.1111/1471-0528.13235.  
29  
30  
31  
32 23. Bond PA, Crisp AS, Morgan MEI, Lobb MO, Cooke RWI. Maternal attitudes to transfer before  
33 delivery. *Journal of Reproductive and Infant Psychology* 1984;2(1):33–41. DOI:  
34 10.1080/02646838408403447.  
35  
36  
37  
38 24. Wilson AM, MacLean D, Skeoch CH, Jackson L. An evaluation of the financial and emotional  
39 impact of *in utero* transfers upon families: a Scotland-wide audit. *Infant* 2010;6(2):38–40.  
40  
41  
42  
43 25. Coster-Schulz MA, Mackey MC. The preterm labour experience: a balancing act. *Clinical*  
44 *Nursing Research* 1998;335–59.  
45  
46  
47  
48 26. Gale C, Hay A, Phillip C, et al. In-utero transfer is too difficult: results from a prospective  
49 study. *Early Human Development* 2012;88:147–50.  
50  
51  
52  
53 27. Macintyre-Beon C, Skeoch C, Jackson J, Booth P, Cameron A. *Perinatal Collaborative*  
54 *Transport Study: Final report*. 2008. Glasgow: Scottish Neonatal Transport Service.  
55  
56  
57  
58  
59  
60

- 1  
2  
3 28. O'Brien ET, Quenby S, Lavender T. Women's view of high risk pregnancy under threat of  
4 preterm birth. *Sexual and Reproductive Health* 2010;1:79–84.  
5  
6  
7  
8 29. Hezelgrave NL, Shennan AH, David AL. Tests to predict imminent delivery in threatened  
9 preterm labour. *BMJ* 2015;350:h2183 doi: 10.1136/bmj.h2183.  
10  
11  
12 30. Chandiramani M, Di Renzo GC, Gottschalk E, Helmer H, Henrich W, Hoesli I, Mol B, Norman  
13 JE, Robson S, Thornton S, Shennan A. Fetal fibronectin as a predictor of spontaneous  
14 preterm birth: a European perspective. *The Journal of Maternal-Fetal & Neonatal Medicine*  
15 2011;24(2):330–336.  
16  
17  
18 31. Deshpande SN, van Asselt ADI, Tomini F, Armstrong N, Allen A, Noake C, et al. Rapid fetal  
19 fibronectin testing to predict preterm birth in women with symptoms of premature labour: a  
20 systematic review and cost analysis. *Health Technol Assess* 2013;17(40).  
21  
22  
23 32. Radford S, Abbott D, Seed P, Kemp J, Shennan. Quantitative fetal fibronectin for the  
24 prediction of preterm birth in symptomatic women. *Arch Dis Child Fetal Neonatal Ed*  
25 2012;97(Suppl 1):A1–A125.  
26  
27  
28 33. Harrison MJ, Kushner KE, Benzies K, et al. Women's satisfaction with their involvement in  
29 health care decisions during a high-risk pregnancy. *Birth* 2003;30(2):109–15.  
30  
31  
32 34. Hill JL, Campbell MK, Zou GY, et al. Prediction of preterm birth in symptomatic women using  
33 decision tree modelling for biomarkers. *Am J Obstet Gynecol* 2008;198:468.e1-468.e9.  
34  
35  
36 35. Gallagher K, Martin J, Keller M, et al. European variation in decision-making and parental  
37 involvement during preterm birth. *Arch Dis Child Fetal Neonatal Ed* 2014;99:F245–9.  
38  
39  
40 36. Peerzada JM, Schollin J, Håkansson S. Delivery room decision-making for extremely preterm  
41 infants in Sweden. *Pediatrics* 2006;117(6):1988–95.  
42  
43  
44 37. Smith J, Firth J. Qualitative data analysis: the framework approach. *Nurse Researcher*  
45 2011;18(2):52–62.  
46  
47  
48 38. Rabiee F. Focus group interview and data analysis. *Proceedings of the Nutrition Society*  
49 2004;63: 655–660.  
50  
51  
52  
53  
54  
55  
56  
57  
58  
59  
60

- 1  
2  
3 39. Furber C. Framework analysis: a method for analysing qualitative data. *African Journal of*  
4  
5 *Midwifery and Women's Health* 2010;4(2):97–100.  
6  
7  
8 40. Sword W. Accounting for presence of self: reflections on doing qualitative research.  
9  
10 *Qualitative Health Research* 1999;9(2):270–8.  
11  
12 41. Haigh C, Witham G. *Distress protocol for qualitative data collection*. 2015. [Online] available  
13  
14 at:  
15  
16 [http://www2.mmu.ac.uk/media/mmuacuk/content/documents/rke/Advisory%20Distress%2](http://www2.mmu.ac.uk/media/mmuacuk/content/documents/rke/Advisory%20Distress%20Protocol.pdf)  
17  
18 [0Protocol.pdf](http://www2.mmu.ac.uk/media/mmuacuk/content/documents/rke/Advisory%20Distress%20Protocol.pdf) accessed October 2015.  
19  
20  
21  
22  
23  
24  
25  
26  
27  
28  
29  
30  
31  
32  
33  
34  
35  
36  
37  
38  
39  
40  
41  
42  
43  
44  
45  
46  
47  
48  
49  
50  
51  
52  
53  
54  
55  
56  
57  
58  
59  
60

1  
2  
3 **Study Protocol: Quantitative Fibronectin to help Decision-making in women**  
4 **with Symptoms of Preterm Labour (QUIDS) Part One- Individual Patient Data**  
5  
6 **Meta-analysis and Health Economic Analysis**  
7

8 Sarah J Stock\*<sup>1,2</sup> Sarah.Stock@ed.ac.uk  
9  
10 Lisa Wotherspoon<sup>1</sup> Lisa.Wotherspoon@ed.ac.uk  
11  
12 Kathleen Boyd<sup>3</sup> Kathleen.Boyd@glasgow.ac.uk  
13  
14 Rachel K Morris<sup>4</sup> r.k.morris@bham.ac.uk  
15  
16 Jon Dorling<sup>5</sup> Jon.Dorling@nottingham.ac.uk  
17  
18 Lesley Jackson<sup>6</sup> Lesley.Jackson@ggc.scot.nhs.uk  
19  
20 Manju Chandiramani<sup>7</sup> m.chandiramani@imperial.ac.uk  
21  
22 Anna David<sup>8</sup> a.david@ucl.ac.uk  
23  
24 Asma Khalil<sup>9</sup> akhalil@sgul.ac.uk  
25  
26 Andrew Shennan<sup>10</sup> andrew.shennan@kcl.ac.uk  
27  
28 Victoria Hodgetts-Morton<sup>4</sup> v.a.h.morton@bham.ac.uk  
29  
30 Tina Lavender<sup>11</sup> Tina.Lavender@manchester.ac.uk  
31  
32 Khalid Khan<sup>12</sup> k.s.khan@qmul.ac.uk  
33  
34 Susan Harper-Clarke<sup>13</sup> su\_clarke@hotmail.com  
35  
36 Ben Mol<sup>14</sup> ben.mol@adelaide.edu.au  
37  
38 Richard D. Riley<sup>15</sup> r.riley@keele.ac.uk  
39  
40 John Norrie<sup>16</sup> J.Norrie@ed.ac.uk  
41  
42 Jane Norman<sup>1</sup> Jane.Norman@ed.ac.uk  
43

44 1. Tommy's Centre for Maternal and Fetal Health, University of Edinburgh MRC  
45 Centre for Reproductive Health, Queen's Medical Research Institute, Edinburgh, UK.  
46  
47 2. School of Women's and Infants' Health, University of Western Australia, Crawley  
48 WA 6009, AUS. 3. Institute of Health & Wellbeing Health Economics & Health  
49  
50 Technology Assessment, University of Glasgow, 1 Lilybank Gardens, Glasgow, UK.  
51  
52 4. School of Clinical and Experimental Medicine, University of Birmingham,  
53  
54 Birmingham, UK. 5. Queen's Medical Centre, Neonatal Unit, Derby Road,  
55  
56  
57  
58  
59



1  
2  
3 Nottingham, UK. 6. Royal Hospital for Children Glasgow, Neonatal Unit  
4 Glasgow, UK. 7. Imperial College Healthcare NHS Trust, Queen Charlotte and  
5 Chelsea Hospital, Du Cane Road, Shepherds Bush, London, UK. 8. University  
6 College London Medical School, Institute for Women's Health, 86-96 Chenies Mews,  
7 University College London Medical School London, UK. 9. St. George's Medical  
8 School, University of London, London, UK. 10. Kings College London, Maternal and  
9 Fetal Research Unit Maternal and Fetal Research Unit 10th Floor, North Wing  
10 London, UK. 11. University of Manchester School of Nursing, Midwifery & Social  
11 Work, Jean McFarlane Building, University Place, Oxford Road  
12 Manchester, UK. 12. Queen Mary, University of London, Centre for Primary Care and  
13 Public Health London, UK. 13. Patient and Public Involvement Representative. No  
14 affiliation. 14. University of Adelaide, The Robinson Institute, School of Paediatrics  
15 and Reproductive Health Adelaide, SA, AUS. 15. Research Institute for Primary Care  
16 and Health Sciences, Keele University, Keele, UK. 16. Edinburgh Clinical Trials Unit,  
17 University of Edinburgh No. 9, Bioquarter Edinburgh, UK.

18  
19  
20  
21  
22  
23  
24  
25  
26  
27  
28  
29  
30  
31  
32  
33  
34 \*Corresponding Author: Dr Sarah J Stock Senior Clinical Lecturer Maternal and Fetal  
35 Medicine, MRC Centre for Reproductive Health, Queen's Medical Research Institute,  
36 47 Little France Crescent, Edinburgh, EH16 4TJ. Tel: 0131 242 6449 Email:  
37 [sarah.stock@ed.ac.uk](mailto:sarah.stock@ed.ac.uk)

38  
39  
40  
41  
42  
43  
44 **Word Count:** 3,582

45  
46 **Key Words:** Pregnancy; Preterm Birth; Fetal Fibronectin; Health Economics;  
47 Individual Patient Data Meta-analysis.  
48  
49  
50  
51  
52  
53  
54  
55  
56  
57  
58  
59  
60

## ABSTRACT

**Introduction:** The aim of the QUIDS study is to develop a decision support tool for the management of women with symptoms and signs of preterm labour, based on a validated prognostic model using quantitative fetal Fibronectin (fFN) concentration, in combination with clinical risk factors.

**Methods and analysis:** The study will evaluate the Rapid fFN 10Q System (Hologic, Malborough, MA) which quantifies fFN in a vaginal swab. In part one of the study we will develop and internally validate a prognostic model using an individual participant data (IPD) meta-analysis of existing studies containing women with symptoms of preterm labour alongside fFN measurements and pregnancy outcome. An economic analysis will be undertaken to assess potential cost-effectiveness of the qfFN prognostic model. The primary endpoint will be the ability of the prognostic model to rule out spontaneous preterm birth within seven days. Six eligible studies were identified by systematic review of the literature and five agreed to provide their IPD (n= 5 studies, 1,783 women and 139 events of preterm delivery within 7 days of testing).

**Ethics and dissemination:** The study is funded by the National Institute of Healthcare Research Health Technology Assessment (HTA 14/32/01). It has been approved by the West of Scotland Research Ethics Committee (16/WS/0068).

**Registration details:** This IPD Meta-analysis is registered with PROSPERO (PROSPERO 2015:CRD42015027590).

**Version:** Protocol Version 2, Date 1<sup>st</sup> November 2016

## STRENGTHS AND LIMITATIONS OF THIS STUDY

### Strengths

- Development of prognostic model and for validation in a separate prospective cohort study

- Health Economic Analysis to determine cost effectiveness from NHS perspective

### **Limitations**

- Not a randomized control trial to test effectiveness of the model on improved patient outcomes

### **HOW PATIENTS ARE INVOLVED IN THIS STUDY**

Patient representatives were consulted during the protocol development and have been invited to join the Project Management Group and the Trial Steering Committee. Prior to commencing QUIDS, we performed a qualitative study to determine the decisional needs of pregnant women with signs and symptoms of preterm labour, their partners and their caregivers. This is described in the separate protocol "QUIDS Qualitative" (Supplementary Material). The end product of QUIDS will be a decision support aid to help clinicians, women and their partners decide on management of threatened preterm labour, based on the results of the quantitative fFN. In QUIDS Qualitative women and clinicians indicated that they would prefer this to be on web based or mobile app based format, presenting the risk of preterm birth within seven days of testing.

## INTRODUCTION

The overall aim of the QUIDS study is to develop a decision support tool for the management of women with symptoms and signs of preterm labour, based on a validated prognostic model using quantitative fFN testing. The study has been conceptually divided into two parts. In this, the protocol for QUIDS Part One, we detail the protocol for development and internal validation of the prognostic model. In the protocol for QUIDS Part Two we detail the protocol for the prospective cohort for external validation of the prognostic model and acceptability testing.[1]

Preterm delivery (before 37 weeks) occurs in 7.1% of pregnancies in the UK (>50,000 deliveries per annum), with the majority the result of preterm labour.[2,3] It remains the leading cause of neonatal morbidity and mortality, but timely interventions, such as antenatal steroids to promote lung maturity, magnesium sulphate for neuroprotection, and delivery in a unit with appropriate neonatal care facilities can improve neonatal outcome. Establishing a diagnosis of preterm labour is, however, difficult. Clinical signs are non-specific and false positive diagnoses are common, with up to 80% of women with signs and symptoms of preterm labour remaining pregnant after seven days. [4, 5] Such diagnostic uncertainty means a large proportion of women with symptoms of preterm labour are treated unnecessarily to ensure benefits to the small proportion of babies that do actually do deliver preterm.

It is understandable that both clinicians and pregnant women may prefer a 'treat-all' approach in women with symptoms of preterm labour, particularly in a setting remote from an appropriate neonatal unit; and in order to ensure steroid prophylaxis in case preterm delivery occurs. However, unnecessary interventions result in both a substantial economic burden to health services and in potential adverse maternal and neonatal events. Hospital admission and inter-hospital transfer have

1  
2  
3 considerable cost implications and can be associated with enormous problems for  
4 women and their families due to physical separation and emotional stress.[6,7]  
5 Neonatal cots become 'blocked' in order to accept a preterm baby just in case  
6 delivery occurs; negatively impacting the efficiency of already stretched neonatal  
7 units and networks. This frequently has knock-on effects to other women and babies,  
8 who may need transfer to another unit due to lack of cot availability despite an  
9 empty, but 'blocked', cot. It also may increase the number of *ex utero* transfers,  
10 which are associated with poorer outcomes than *in utero* transfers.[8] If preterm  
11 labour has been wrongly diagnosed, and delivery does not occur, steroids may also  
12 have adverse long-term consequences for the baby, especially if multiple courses  
13 are given.[9] Tocolytic therapy, even when appropriate can have serious side effects  
14 for both mother and baby.[10] Lastly, uncertainty of outcome may contribute to the  
15 high anxiety scores seen in women with threatened preterm labour and their  
16 partners.[11]

17  
18  
19 Diagnostic tests for preterm labour are available and used in many units in the UK.  
20 Fetal Fibronectin (fFN; Hologic, Marlborough, MA, USA) is a biochemical marker of  
21 preterm labour that can be measured in samples of cervicovaginal secretions  
22 collected at a speculum examination. It has potential to help improve diagnosis of  
23 impending preterm delivery.[12] Other biochemical tests which are available include  
24 Actim Partus (Medixbiochemica, Espoo, Finland) which measures phosphorylated  
25 insulin-like growth factor binding protein-1 (plIGFBP-1), and Partosure (Parsagen  
26 Diagnostics, Boston, MA, USA) which measures placental alpha microglobulin-1  
27 (PAMG-1). An alternative approach (which can be combined with fFN) is to measure  
28 the cervical length using transvaginal ultrasound, as the longer the cervix is, the less  
29 likely a preterm delivery.[12]

1  
2  
3 As part of an Health Technology Assessment (HTA) report Honest et al found that a  
4 qualitative fFN test (giving a positive or negative result based on a single threshold of  
5 50ng/ml) was potentially useful in the prediction of preterm delivery <34 weeks  
6 gestation, with its main benefit relating to its high negative predictive value i.e. its  
7 ability to rule out impending delivery.[12] A more recent HTA-funded review found  
8 that qualitative fFN testing has moderate accuracy for predicting preterm birth with  
9 overall sensitivity and specificity estimates of 76.7% and 82.7% for delivery within 7-  
10 10 days.[13] These estimates suggest that qualitative testing on its own would not  
11 have the sensitivity to rule out preterm delivery adequately, although in systematic  
12 review of clinical trials, no increase in neonatal morbidity or mortality was seen in  
13 association with false negative fFN results.[13] The authors concluded that this  
14 observation is likely to relate to the multifactorial nature of assessment of the risk of  
15 preterm delivery, where, in practice, fFN is just one component of the clinical  
16 assessment on which management decisions are based.[13]  
17  
18  
19  
20  
21  
22  
23  
24  
25  
26  
27  
28  
29  
30  
31

32 Both HTA reviews described above examined the performance of a qualitative fFN  
33 test, which provided a positive or negative result on the basis of a single threshold of  
34 50ng/ml. Recently, this test has been replaced in the UK with the Rapid fFN 10Q  
35 System, which provides a concentration of fFN within 10 minutes, and thus may be a  
36 more useful predictor of preterm delivery (quantitative fFN). We surveyed current  
37 practice in UK maternity units (response rate 66% [137/207]; Mar-July 2014).[14]  
38 135/137 units (98.5%) use some sort of diagnostic test of preterm labour. The most  
39 common test is fFN (84/137 units; 61.3%). fFN is now only available with a  
40 quantitative analyser in the UK, but there is no consensus as to which women to use  
41 the test in, or how to interpret the results. Developing and evaluating a decision  
42 support for qfFN is thus likely to improve decision making, even if qfFN is already  
43 available in clinical practice. Evidence about the potential value of the new  
44  
45  
46  
47  
48  
49  
50  
51  
52  
53  
54  
55  
56  
57  
58  
59  
60

1  
2  
3 quantitative fFN is required, along with guidance about how to interpret results. The  
4  
5 QUIDS study will address this evidence gap.  
6  
7

## 8 9 **METHODS AND ANALYSIS**

### 10 11 **Aims and Methodologies**

12 The aim of the QUIDS study is to develop a decision support tool for the  
13  
14 management of women with symptoms and signs of preterm labour, based on a  
15  
16 validated prognostic model using quantitative fFN testing.  
17

18 The study protocol has been divided into two parts (see flow chart Figure 1). The  
19  
20 protocols for Parts One and Two are reported in separate manuscripts.  
21  
22

#### 23 24 Part 1: Development and Internal Validation of Prognostic Model

25  
26 i) Individual Participant Data (IPD) meta-analysis to develop a prognostic model  
27  
28 using quantitative fFN and other risk (prognostic) factors and to evaluate the added  
29  
30 value of quantitative fFN toward this prognostic model performance. A prognostic  
31  
32 model will be developed and internally validated[15,16] based on a meta-analysis of  
33  
34 IPD from existing prospective cohort studies where quantitative fFN results and  
35  
36 pregnancy outcome details are available. The primary outcome will be prediction will  
37  
38 be delivery within 7 days, although other endpoints will be included if recommended  
39  
40 by focus groups.  
41

42 (ii) Economic Analysis: To provide an economic rationale for the prognostic model  
43  
44 and analyze its cost-effectiveness from the perspective of the NHS to provide an  
45  
46 economic rationale for the prognostic model and the risk factors included in it.  
47  
48  
49

50 Part 2: Validation And Refinement Of Prognostic Model Involves a prospective cohort  
51  
52 study and acceptability testing, with external validation, (and, if necessary,  
53  
54 refinement) of the prognostic model, and update of health economic model.[1]  
55  
56  
57  
58  
59

## Endpoints

The primary endpoint is spontaneous preterm delivery within seven days of qfFN test, in women tested at less than 36 weeks gestation. This is both an important endpoint for women and caregivers (determined in QUIDS Qualitative study – a preceding qualitative study to identify the decisional needs of women, their partners and clinicians; Supplementary Material) as well as a clinically important endpoint. Antenatal steroids (which significantly reduce morbidity and mortality in preterm babies[17]) are most effective if delivery occurs within seven days of administration. As repeated doses of antenatal steroids may be harmful, it is crucial to ensure steroids are timed correctly.

A secondary endpoint suggested by the preceding QUIDS Qualitative Study consultation (Supplementary Material), was delivery within 48 hours of qfFN test. This analysis will be performed if feasible to do so within the constraints of the data available for model development.

## Health technologies being assessed

The study will evaluate the Rapid fFN 10Q System (Hologic), which provides a concentration of fFN (ng/ml or INVALID) in a vaginal swab sample. Further details about the system and recommended sampling technique are provided in the QUIDS Protocol Part Two. [1]

## Target population

The target population is pregnant women attending hospital with signs and symptoms of preterm labour.

## Development Of Prognostic Model



### Individual Patient Data Meta-Analysis

The proposed IPD-Meta-analysis was registered on PROSPERO (2015:CRD42015027590). Our IPD meta-analytical approach will follow existing guidelines, and our output will comply with the TRIPOD statement (Transparent reporting of a multivariable prediction model for individual prognosis or diagnosis statement).[18]

#### *Inclusion Criteria*

We prespecified inclusion of prospective cohort studies or RCTs of women with signs and symptom of preterm labour (as defined by investigators) that include quantitative fFN results determined by 10Q rapid fFN analyzer system and pregnancy outcome data; and the Principal Investigator of which has agreed to collaborate and provide data.

#### *Exclusion criteria*

We will exclude studies where fFN concentration was measured by ELISA and studies where IPD is not available for meta-analysis

#### *Search Strategy*

When applying for funding for this study (April 2014) we performed a literature search for completed and ongoing cohort studies of quantitative fFN using search terms for quantitative fetal/foetal fibronectin and preterm birth, including databases (MEDLINE, EMBASE, Cochrane Database of Systematic Reviews (CDSR), Database of Abstracts of Reviews of Effects (DARE) and Health Technology Assessment Database (HTA)) and clinical trial registries (Cochrane Central Register of Controlled Trials (CENTRAL), ClinicalTrials.Gov) general search engines (such as Google: <https://www.google.co.uk>) and systematic reviews. We also consulted preterm birth

1  
2  
3 researchers and networks (RCOG CSG; BMFMS, PREBIC) and the manufacturers  
4 of quantitative fFN, (Hologic) to help ensure capture of all relevant studies.  
5  
6  
7

8  
9 Study manuscripts and/or protocols were screened by two researchers. We identified  
10 a total of 10 studies of quantitative fFN that were potentially eligible. Four early  
11 datasets (in three manuscripts) used ELISA to determine the concentration of fFN  
12 and were excluded as the different method of analysis and earlier period of study  
13 would increase heterogeneity.[5,19,20] Therefore, six studies fulfilled the eligibility  
14 criteria (see Table 1).  
15  
16  
17  
18  
19

#### 20 21 22 *Establishment of the quantitative fFN IPD Collaboration*

23  
24 We contacted the principal investigators (PIs) of the six eligible studies of qfFN  
25 invited them to participate (see Table 1). Five of these agreed to provide their IPD as  
26 evidenced by their involvement as co-applicants on the funding application and/or co-  
27 authorship of this protocol (Mol, van Baaren, Khalil, Shennan, David). The PI of the  
28 6<sup>th</sup> study (Elovitz) indicated IPD may be available after publication of her study.  
29  
30  
31  
32  
33  
34  
35

36  
37 The five included studies (Table 1) are European studies of women with symptoms of  
38 preterm labour, comprising 1,783 women and 139 events of preterm delivery within 7  
39 days of testing. They are from consultant led maternity units in the UK (three studies)  
40 and Europe (two studies). All women in the included trials provided informed consent  
41 for participation in clinical trials, and for their IPD to be used in subsequent analyses.  
42  
43  
44  
45  
46  
47  
48  
49  
50  
51  
52  
53  
54  
55  
56  
57  
58  
59  
60

|                                                                                                                    | PI             | Setting                  | N            | Events     | Dates      | Inclusion                                                      | Primary Outcome                      |
|--------------------------------------------------------------------------------------------------------------------|----------------|--------------------------|--------------|------------|------------|----------------------------------------------------------------|--------------------------------------|
| <b>Studies with data available</b>                                                                                 |                |                          |              |            |            |                                                                |                                      |
| EQUIPP [21,22]                                                                                                     | Prof A Shennan | 5 UK centres             | 452          | 14         | 2010-2012  | 22-35 weeks with symptoms of preterm labour                    | Delivery <34 weeks gestation         |
| EUFIS* [23]                                                                                                        | Prof BW Mol    | 10 European Hospitals    | 452          | 48         | 2012-2014  | 24-34 weeks with preterm contractions and intact membranes     | Delivery within 7 days of test       |
| APOSTEL I* [24]                                                                                                    | van Baaren     | 10 Dutch Hospitals       | 528          | 70         | 2009 -2012 | 24-34 weeks with preterm contractions and intact membranes     | Days to delivery truncated at 7 days |
| QFCAPS (unpublished)                                                                                               | Dr A Khalil    | London teaching hospital | 86           | 2          | 2012-2014  | 24-34 weeks with symptoms of preterm labour<br>Singletons only | Delivery within 7 days of test       |
| UCLH/Whit (unpublished)                                                                                            | Dr A David     | 2 UK centres             | 262          | 5          | 2009-2010  | 22-35 weeks with symptoms of preterm labour                    | Delivery within 7 days of test       |
|                                                                                                                    | <b>TOTALS</b>  | <b>4 studies</b>         | <b>1,783</b> | <b>139</b> |            |                                                                |                                      |
| <b>Studies where data may be available in future</b>                                                               |                |                          |              |            |            |                                                                |                                      |
| STOP study ( <a href="http://clinicaltrials.gov/show/NCT01868308">http://clinicaltrials.gov/show/NCT01868308</a> ) | Prof M Elovitz | USA teaching hospital    | 700          | NK         | 2011-2015  | 22 -34 weeks<br>Symptomatic women with singleton pregnancy     | Delivery before 37 weeks             |

Table 1: Details of studies contributing data to IPD meta-analysis.

\*Study unpublished at time of search in April 2014; manuscript now published

1           1    *Study Quality Assessment and Data Collection*

2           2    IPD will be stored in a bespoke database on a secure server at the University of  
3           3    Edinburgh. PIs will be asked to provide de-identified data, and consider all recorded  
4           4    variables (even if not reported publications). We will assess study quality according  
5           5    to QUADAS-2[25] QUIPS[26] and CHARMS[27] guidelines.  
6

7           7    *Sample Size Considerations*

8           8    The size of the IPD meta-analysis is limited by the number of studies with data  
9           9    available (Table 1). In model development the number of covariates that can be  
10          10    considered is limited by the number of events, with guidance suggesting at least ten  
11          11    events required for each covariate.[28,29] In our IPD meta-analysis data we have  
12          12    139 events (preterm labour within 7 days of testing) and therefore deemed that it was  
13          13    sensible to evaluate quantitative fFN and up to 13 other factors (covariates) for  
14          14    potential inclusion in our model.  
15

16          16    *Data Items*

17          17    The following factors which are thought to influence risk of spontaneous preterm  
18          18    birth, will be requested and considered for inclusion as covariates in the prognostic  
19          19    model: quantitative fFN concentration, previous spontaneous preterm labour,  
20          20    gestation at fFN test, age, ethnicity, BMI, smoking, deprivation index, number of  
21          21    uterine contractions in set time period, cervical dilatation, vaginal bleeding, previous  
22          22    cervical treatment for cervical intraepithelial neoplasia, cervical length (measured by  
23          23    transvaginal cervical length), singleton/multiple pregnancy, tocolysis and fetal sex.  
24          24    Up to 13 of these will be prespecified for inclusion, based on available data (we will  
25          25    only use variables which are available in each study), and ranking for likely clinical  
26          26    relevance as agreed by consensus of the project management team.  
27

28          28    *Data Cleaning*

1 Prior to analysis data will be checked for outliers and missing data will be identified.  
2  
3  
4 Descriptive statistics will be performed to summarise data. Problems identified will be  
5  
6 discussed with the PI of the original study, and amended as indicated by consensus  
7  
8 discussion.  
9

10 5

#### 11 6 *Data Analysis and Prognostic Model Development*

12  
13 7 Multivariable logistic regression modelling will be the primary method of analysis. The  
14  
15 8 primary endpoint for the prognostic model will be delivery within seven days. Another  
16  
17 9 endpoint found to be important in focus group consultations performed in QUIDS  
18  
19 10 Qualitative (Supplementary Material) included delivery within 48 hours, and we will  
20  
21 11 use this as a secondary endpoint if feasible (i.e. if sufficient number of cases with  
22  
23 12 delivery within 48 hours). We will develop an initial model with quantitative fFN  
24  
25 13 concentration, and then consider a model with other predefined clinical predictor  
26  
27 14 variables (see *Data Items*, above).  
28

29 15

30  
31 16 Tocolysis (which may delay onset of labour, although likely not beyond 48 hours) will  
32  
33 17 be included as a categorical variable (administered/not administered). We will  
34  
35 18 explore treatment effect by sensitivity analysis with and without the assumption that  
36  
37 19 tocolysis could delay delivery within 48 hours by a maximum odds ratio of 5.39, 95%  
38  
39 20 credible interval 2.14 to 12.34, based on data in Haas et al.[30].  
40

41 21

42  
43 22 As the outcome is binary, a logistic regression modelling framework will be used to  
44  
45 23 develop the model. A multi-level structure will be used to account for clustering of  
46  
47 24 patients within studies, and heterogeneity of the effects of included factors (hereafter  
48  
49 25 called 'predictors') will be accounted for using random-effects, with between-study  
50  
51 26 heterogeneity quantified using the estimated variance ('tau-squared') and the  $I^2$   
52  
53 27 statistic. A separate intercept term per study will be included in the model, to account  
54  
55 28 for the clustering and also gauge how predictions may require tailoring to different  
56  
57 29 populations. Predictors with large heterogeneity in the prognostic effect across  
58

1 studies may be removed to ensure summary Beta terms in the model are meaningful  
2 (accurate) for individual populations.[16]

3  
4  
5  
6  
7  
8 In the primary analysis, we will use data from the first recorded attendance with signs  
9 and symptoms of preterm labour to determine the relationship between that individual  
10 episode and outcome. Data from subsequent attendances will be analysed  
11 subsequently, and may be included in an appropriate model. As a parsimonious model  
12 is sought, to reduce the factors included in the model that may otherwise delay its  
13 use, we will use backward stepwise selection based on an information criterion (e.g.  
14 Akaike's information criterion  $p < 0.15$ ) to identify a parsimonious set of factors to be  
15 included in the model; hereafter these are referred to as included 'predictors'.  
16 Further, an approach of adding specialist tests, such as cervical length, only after  
17 considering simpler clinical assessment will be used, to maximise the utility of the  
18 model by ensuring that extra tests with their additional costs are only be included if  
19 they add to the predictive power.

20  
21  
22  
23  
24  
25  
26  
27  
28  
29  
30  
31  
32  
33  
34  
35  
36  
37  
38  
39  
40  
41  
42  
43  
44  
45  
46  
47  
48  
49  
50  
51  
52  
53  
54  
55  
56  
57  
58  
59  
60  
61  
62  
63  
64  
65  
66  
67  
68  
69  
70  
71  
72  
73  
74  
75  
76  
77  
78  
79  
80  
81  
82  
83  
84  
85  
86  
87  
88  
89  
90  
91  
92  
93  
94  
95  
96  
97  
98  
99  
100  
101  
102  
103  
104  
105  
106  
107  
108  
109  
110  
111  
112  
113  
114  
115  
116  
117  
118  
119  
120  
121  
122  
123  
124  
125  
126  
127  
128  
129  
130  
131  
132  
133  
134  
135  
136  
137  
138  
139  
140  
141  
142  
143  
144  
145  
146  
147  
148  
149  
150  
151  
152  
153  
154  
155  
156  
157  
158  
159  
160  
161  
162  
163  
164  
165  
166  
167  
168  
169  
170  
171  
172  
173  
174  
175  
176  
177  
178  
179  
180  
181  
182  
183  
184  
185  
186  
187  
188  
189  
190  
191  
192  
193  
194  
195  
196  
197  
198  
199  
200  
201  
202  
203  
204  
205  
206  
207  
208  
209  
210  
211  
212  
213  
214  
215  
216  
217  
218  
219  
220  
221  
222  
223  
224  
225  
226  
227  
228  
229  
230  
231  
232  
233  
234  
235  
236  
237  
238  
239  
240  
241  
242  
243  
244  
245  
246  
247  
248  
249  
250  
251  
252  
253  
254  
255  
256  
257  
258  
259  
260  
261  
262  
263  
264  
265  
266  
267  
268  
269  
270  
271  
272  
273  
274  
275  
276  
277  
278  
279  
280  
281  
282  
283  
284  
285  
286  
287  
288  
289  
290  
291  
292  
293  
294  
295  
296  
297  
298  
299  
300  
301  
302  
303  
304  
305  
306  
307  
308  
309  
310  
311  
312  
313  
314  
315  
316  
317  
318  
319  
320  
321  
322  
323  
324  
325  
326  
327  
328  
329  
330  
331  
332  
333  
334  
335  
336  
337  
338  
339  
340  
341  
342  
343  
344  
345  
346  
347  
348  
349  
350  
351  
352  
353  
354  
355  
356  
357  
358  
359  
360  
361  
362  
363  
364  
365  
366  
367  
368  
369  
370  
371  
372  
373  
374  
375  
376  
377  
378  
379  
380  
381  
382  
383  
384  
385  
386  
387  
388  
389  
390  
391  
392  
393  
394  
395  
396  
397  
398  
399  
400  
401  
402  
403  
404  
405  
406  
407  
408  
409  
410  
411  
412  
413  
414  
415  
416  
417  
418  
419  
420  
421  
422  
423  
424  
425  
426  
427  
428  
429  
430  
431  
432  
433  
434  
435  
436  
437  
438  
439  
440  
441  
442  
443  
444  
445  
446  
447  
448  
449  
450  
451  
452  
453  
454  
455  
456  
457  
458  
459  
460  
461  
462  
463  
464  
465  
466  
467  
468  
469  
470  
471  
472  
473  
474  
475  
476  
477  
478  
479  
480  
481  
482  
483  
484  
485  
486  
487  
488  
489  
490  
491  
492  
493  
494  
495  
496  
497  
498  
499  
500  
501  
502  
503  
504  
505  
506  
507  
508  
509  
510  
511  
512  
513  
514  
515  
516  
517  
518  
519  
520  
521  
522  
523  
524  
525  
526  
527  
528  
529  
530  
531  
532  
533  
534  
535  
536  
537  
538  
539  
540  
541  
542  
543  
544  
545  
546  
547  
548  
549  
550  
551  
552  
553  
554  
555  
556  
557  
558  
559  
560  
561  
562  
563  
564  
565  
566  
567  
568  
569  
570  
571  
572  
573  
574  
575  
576  
577  
578  
579  
580  
581  
582  
583  
584  
585  
586  
587  
588  
589  
590  
591  
592  
593  
594  
595  
596  
597  
598  
599  
600  
601  
602  
603  
604  
605  
606  
607  
608  
609  
610  
611  
612  
613  
614  
615  
616  
617  
618  
619  
620  
621  
622  
623  
624  
625  
626  
627  
628  
629  
630  
631  
632  
633  
634  
635  
636  
637  
638  
639  
640  
641  
642  
643  
644  
645  
646  
647  
648  
649  
650  
651  
652  
653  
654  
655  
656  
657  
658  
659  
660  
661  
662  
663  
664  
665  
666  
667  
668  
669  
670  
671  
672  
673  
674  
675  
676  
677  
678  
679  
680  
681  
682  
683  
684  
685  
686  
687  
688  
689  
690  
691  
692  
693  
694  
695  
696  
697  
698  
699  
700  
701  
702  
703  
704  
705  
706  
707  
708  
709  
710  
711  
712  
713  
714  
715  
716  
717  
718  
719  
720  
721  
722  
723  
724  
725  
726  
727  
728  
729  
730  
731  
732  
733  
734  
735  
736  
737  
738  
739  
740  
741  
742  
743  
744  
745  
746  
747  
748  
749  
750  
751  
752  
753  
754  
755  
756  
757  
758  
759  
760  
761  
762  
763  
764  
765  
766  
767  
768  
769  
770  
771  
772  
773  
774  
775  
776  
777  
778  
779  
780  
781  
782  
783  
784  
785  
786  
787  
788  
789  
790  
791  
792  
793  
794  
795  
796  
797  
798  
799  
800  
801  
802  
803  
804  
805  
806  
807  
808  
809  
810  
811  
812  
813  
814  
815  
816  
817  
818  
819  
820  
821  
822  
823  
824  
825  
826  
827  
828  
829  
830  
831  
832  
833  
834  
835  
836  
837  
838  
839  
840  
841  
842  
843  
844  
845  
846  
847  
848  
849  
850  
851  
852  
853  
854  
855  
856  
857  
858  
859  
860  
861  
862  
863  
864  
865  
866  
867  
868  
869  
870  
871  
872  
873  
874  
875  
876  
877  
878  
879  
880  
881  
882  
883  
884  
885  
886  
887  
888  
889  
890  
891  
892  
893  
894  
895  
896  
897  
898  
899  
900  
901  
902  
903  
904  
905  
906  
907  
908  
909  
910  
911  
912  
913  
914  
915  
916  
917  
918  
919  
920  
921  
922  
923  
924  
925  
926  
927  
928  
929  
930  
931  
932  
933  
934  
935  
936  
937  
938  
939  
940  
941  
942  
943  
944  
945  
946  
947  
948  
949  
950  
951  
952  
953  
954  
955  
956  
957  
958  
959  
960  
961  
962  
963  
964  
965  
966  
967  
968  
969  
970  
971  
972  
973  
974  
975  
976  
977  
978  
979  
980  
981  
982  
983  
984  
985  
986  
987  
988  
989  
990  
991  
992  
993  
994  
995  
996  
997  
998  
999  
1000

### *Assessing Apparent Model Performance*

26 The apparent performance of the model will be assessed by its overall fit, and the  
27 observed discrimination and calibration in the IPD used to develop the model. Overall  
28 fit of the models will be expressed with Nagelkerke  $R^2$ . The ability of the models to  
29 discriminate between women with and without spontaneous preterm birth will be

1 determined by the area under the receiver operating characteristics curve (AUC),  
2 also known as the *C* statistic. Agreement between predicted and observed  
3 proportions of women with spontaneous preterm birth will be visualized using a  
4 calibration plot, and measured using calibration slope and calibration-in-the-large.

#### 5 6 *Internal validation: assessing Optimism In Model Performance*

7 Apparent performance is likely to be optimistic, as it is examined in the same data  
8 used for model development. Therefore internal validation will also be undertaken  
9 using a non-parametric bootstrap re-sampling technique in which each modelling  
10 step is repeated in each bootstrap sample, to obtain a new model in each bootstrap  
11 sample, and then its apparent performance (AUC and calibration slope) in the  
12 bootstrap sample is compared to its performance in the original dataset. The  
13 'optimism' is the mean difference (across all bootstrap samples) between the  
14 apparent value in the bootstrap sample and the observed value in the original  
15 dataset. This optimism estimate is then subtracted from the original model's apparent  
16 performance, to give an optimism-adjusted estimate of each measure of performance  
17 for the original model (e.g.  $R^2$ , *C* statistic, Calibration slope).

#### 18 19 *Production Of Final Model From IPD Meta-Analysis Via Uniform Shrinkage*

20 The optimism-adjusted calibration slope will be used as a uniform shrinkage factor, to  
21 adjust the parameter estimates (log odds ratios) of the original model. The beta  
22 coefficients in the original model will be multiplied by the shrinkage factor, and the  
23 study intercept terms re-estimated to ensure perfect overall calibration is maintained  
24 (across all studies and, ideally, in each study separately). This will thereby produce a  
25 final model containing the updated intercepts and the shrunken beta coefficients.[31]  
26 With multiple intercepts, a strategy (or strategies) will be developed amongst the  
27 study investigators for which intercept should be chosen for use when externally  
28 validating the model in a new population (e.g. choose intercept from study that most

1 closely resembles the population of application); each strategy will be evaluated and  
2 compared in the cohort study external validation phase.

3

#### 4 *Added Value Of Quantitative fFN*

5 The added value of quantitative fFN will be examined throughout the whole model  
6 process, in particular its improvement on discrimination, calibration and other  
7 meaningful factors (such as clinical decisions) using appropriate techniques (such as  
8 net reclassification improvement and decision analysis methods).

9

#### 10 *Subgroup analyses*

11 Subgroup analysis will be performed for multiple pregnancy, women with a previous  
12 preterm labour, gestation and those with criteria that are suggested to indicate  
13 preterm labour (number of uterine contractions in a set time period and/or cervical  
14 change). This will allow us to do a subgroup-analysis in which we assess whether the  
15 predictive capacity of quantitative fFN is similar in all subgroups.

16

#### 17 *Health Economic Analysis*

18 An early stage decision-analytic model will be built using evidence from current  
19 literature and from the IPD meta-analysis to explore the potential cost-effectiveness  
20 of different prognostic models including quantitative fFN.

21 A literature review will be undertaken to inform model design and identify additional  
22 model parameters with searches of Medline, Embase, Cochrane Library and the  
23 Paediatric Economic Database Evaluation for economic analyses including the use of  
24 fFN testing in woman with threatened preterm labour. Any evidence on resource use  
25 (test administration, treatments for preterm labour, hospital stay, hospital transfers,  
26 etc), quality of life and diagnostic outcome data from the IPD meta-analysis will be  
27 synthesized with the wider evidence based on current practice for women attending  
28 hospital with signs and symptoms of preterm labour. The economic analysis will be  
29 undertaken from the perspective of the UK NHS adhering to good practice guidelines



1 and the NICE reference case.[32] A decision tree will be developed to model the  
2 clinical pathway. The model will be used to explore potential cost effectiveness of  
3 the prognostic model at different thresholds on the Receiver Operator Curve,  
4 providing an economic rationale for the chosen prognostic model.  
5

## 6 **ETHICS AND DISSEMINATION**

### 7 **Trial Management And Oversight Arrangements**

#### 8 Project Management Group

9 The trial will be coordinated by a Project Management Group (PMG), consisting of  
10 the grant holders (Chief Investigator and Co-applicants), the trial manager,  
11 representatives from the Study Office and CHaRT (the supporting CTU), plus service  
12 user representatives (PAG). The PMG will meet approximately every four months by  
13 teleconference or face to face.  
14

#### 15 Trial Steering Committee and Data Monitoring Committee

16 A combined Trial Steering Committee and Data Monitoring Committee (TSC/DMC)  
17 will oversee the conduct and progress of the study. The terms of reference of the  
18 Committee will be developed separately. Members of the TSC/DMC will consist of  
19 experts and two patient representatives.  
20

#### 21 **Good Clinical Practice**

22 The study will be conducted in accordance with the principles of Good Clinical  
23 Practice (GCP). A favorable ethical opinion has been obtained from the appropriate  
24 REC (reference 16/WS/0068) and local R&D approval will be obtained prior to  
25 commencement of the study at each site.  
26

#### 27 **Dissemination**

28 On completion of the study, the study data will be analysed and tabulated, and a  
29 clinical study report will be prepared. Results will be communicated to the academic

1 community via the scientific literature, attendance at conferences and invited  
2 presentations. The TRIPOD reporting guidelines will be adhered to.[18] Summaries  
3 of results will also be made available to investigators for dissemination within clinics.  
4 Social media will be used to signpost publications and conference presentations and  
5 highlight important findings. Twitter and Facebook will be used to disseminate  
6 findings to professional organizations, charities, stakeholders and the public.  
7 Communication to the general public will further be facilitated by our close links with  
8 charities such as Tommy's [33].

#### 10 **PEER REVIEW**

11 The study was extensively peer reviewed as part of the process of gaining grant  
12 funding from the NIHR HTA (14/32/01).

#### 14 **FUNDING**

15 This project was funded by the National Institute of Healthcare Research Health  
16 Technology and Assessment (Reference 14/32/01). The views expressed are those  
17 of the authors and not necessarily those of the NHS, the NIHR or the Department of  
18 Health.

#### 20 **CONTRIBUTIONS TO AUTHORSHIP**

21 SJS, KB, RKM, JD, LJ, MC, AD, AK, AS, VHM, TL, KK, SHC, BM, RDR, JN and JEN  
22 developed the protocol. SJS, LW, RDR, KB, TL and JN drafted the protocol. RKM,  
23 JD, LJ, MC, AD, AK, AS, VHM, KK, SHC, BM and JEN reviewed and commented on  
24 the protocol.

#### 26 **COMPETING INTERESTS**

27 SJS and JEN work at the University of Edinburgh, who received £1000 sponsorship  
28 from Hologic to support a meeting (The Society of Reproductive Investigation and

1 MRC Centre for Reproductive Health Scientific Symposium on Targeting  
2 Inflammation to Improve Reproductive Health across the Lifecourse – August 2017).  
3 AS has in the past (over last five years; not in the last three years) received funding  
4 for expenses related to advisory board and internal staff education from Hologic.  
5 MC received sponsorship from Hologic to organise an educational teaching focusing  
6 on prediction of Preterm Birth at the 2017 annual meeting of the British Maternal and  
7 Fetal Medicine Society.  
8 Hologic, the makers of fFN have provided analysers and technical support for their  
9 use to sites participating in the QUIDS prospective cohort study. They have no  
10 access to the data, or other involvement in the conduct, analysis, interpretation or  
11 decision to publish the results of the study.

## 13 REFERENCES

- 14 1. Stock SJ, Wotherspoon L, Boyd K et al. Study Protocol: Quantitative Fibronectin to  
15 help Decision-making in women with Symptoms of Preterm Labour (QUIDS)  
16 Part Two- Prospective Cohort Study. *Submitted to BMJ Open alongside this*  
17 *manuscript(see supplementary information)*
- 18 2. Office for National Statistics (2013). ONS gestation-Specific Infant Mortality in  
19 England and Wales 2011. Cardiff ONS, 2013. Also available at:  
20 [https://www.ons.gov.uk/peoplepopulationandcommunity/healthandsocialcare/  
21 causesofdeath/bulletins/pregnancyandethnicfactorsinfluencingbirthsandinfant  
22 mortality/2013-10-10](https://www.ons.gov.uk/peoplepopulationandcommunity/healthandsocialcare/causesofdeath/bulletins/pregnancyandethnicfactorsinfluencingbirthsandinfantmortality/2013-10-10) (accessed 23<sup>rd</sup> November 2017).
- 23 3. Information Services Division (2013). "Births in Scottish hospitals 2012". Edinburgh  
24 National Services Scotland, 2013. Also available at:  
25 [http://www.isdscotland.org/Health-Topics/Maternity-and-  
26 Births/Publications/2013-08-27/2013-08-27-Births-Report.pdf?34511965514](http://www.isdscotland.org/Health-Topics/Maternity-and-Births/Publications/2013-08-27/2013-08-27-Births-Report.pdf?34511965514)  
27 (accessed 23<sup>rd</sup> November 2017).

- 1 4. Kenyon SL, Taylor DJ, Tarnow-Mordi W and Oracle Collaborative Group. Broad-  
2 spectrum antibiotics for spontaneous preterm labour: the ORACLE II  
3 randomised trial. ORACLE Collaborative Group. *Lancet* 2001;357(9261):989-  
4 94
- 5 5. Peaceman AM, Andrews WW, Thorp JM, et al. Fetal fibronectin as a predictor of  
6 preterm birth in patients with symptoms: a multicenter trial. *Am J Obstet*  
7 *Gynecol* 1997;177(1):13-8
- 8 6. Macintyre-Beon C, Skeoch C, Jackson L, Booth P, Cameron A. Scottish Perinatal  
9 Collaborative Transport Study. NHS Quality Improvement Scotland 2008
- 10 7. Wilson A, MacLean D, Skeoch C, Jackson L. An evaluation of the financial and  
11 emotional impact of in utero transfers upon families: a Scotland-wide audit.  
12 *Infant* 2010;6(2):38-40
- 13 8. Marlow N, Bennett C, Draper ES, Hennessy EM, Morgan AS, Costeloe KL.  
14 Perinatal outcomes for extremely preterm babies in relation to place of birth in  
15 England: the EPICure 2 study. *Arch Dis Child Fetal Neonatal Ed*  
16 2014;99(3):F181-8
- 17 9. Asztalos EV, Murphy KE, Willan AR, et al. Multiple Courses of Antenatal  
18 Corticosteroids for Preterm Birth Study: Outcomes in Children at 5 Years of  
19 Age (MACS-5). *JAMA Pediatr* 2013
- 20 10. de Heus R, Mol BW, Erwich JJ, et al. Adverse drug reactions to tocolytic  
21 treatment for preterm labour: prospective cohort study. *BMJ* 2009;338:b744
- 22 11. Yee WH, Sauve R. What information do parents want from the antenatal  
23 consultation? *Paediatr Child Health* 2007;12(3):191-6
- 24 12. Honest H, Forbes CA, Duree KH, et al. Screening to prevent spontaneous  
25 preterm birth: systematic reviews of accuracy and effectiveness literature with  
26 economic modelling. *Health Technol Assess* 2009;13(43):1-627
- 27 13. Deshpande SN, van Asselt AD, Tomini F, et al. Rapid fetal fibronectin testing to  
28 predict preterm birth in women with symptoms of premature labour: a

- 1  
2  
3  
4  
5  
6  
7  
8  
9  
10  
11  
12  
13  
14  
15  
16  
17  
18  
19  
20  
21  
22  
23  
24  
25  
26  
27  
28  
29  
30  
31  
32  
33  
34  
35  
36  
37  
38  
39  
40  
41  
42  
43  
44  
45  
46  
47  
48  
49  
50  
51  
52  
53  
54  
55  
56  
57  
58  
59  
60
- 1 systematic review and cost analysis. *Health Technol Assess* 2013;17(40):1-  
2 138  
3  
4  
5  
6 14. Stock SJ, Morris RK, Chandiramani M et al. Variation in management of women  
7 with threatened preterm labour. *Arch Dis Child Fetal Neonatal Ed*  
8  
9 2015;100(3):F276  
10  
11  
12 15. Debray TP, Riley RD, Rovers MM, Reitsma JB, Moons KG, Cochrane IPDM-  
13 aMg. Individual participant data (IPD) meta-analyses of diagnostic and  
14 prognostic modeling studies: guidance on their use. *PLoS Med*  
15  
16 2015;12(10):e1001886  
17  
18  
19  
20 16. Debray TP, Moons KG, Ahmed I, Koffijberg H, Riley RD. A framework for  
21 developing, implementing, and evaluating clinical prediction models in an  
22 individual participant data meta-analysis. *Statistics in medicine*  
23  
24 2013;32(18):3158-80  
25  
26  
27  
28 17. Roberts D, Brown J, Medley N, Dalziel SR. Antenatal corticosteroids for  
29 accelerating fetal lung maturation for women at risk of preterm birth.  
30  
31  
32  
33  
34  
35  
36  
37  
38  
39  
40  
41  
42  
43  
44  
45  
46  
47  
48  
49  
50  
51  
52  
53  
54  
55  
56  
57  
58  
59  
60
- 17 18. Collins GS, Reitsma JB, Altman DG, Moons KG. Transparent reporting of a  
18 multivariable prediction model for individual prognosis or diagnosis (TRIPOD):  
19 the TRIPOD statement. *BMJ* 2015;350:g7594  
20  
21  
22  
23  
24  
25  
26  
27  
28  
29  
30  
31  
32  
33  
34  
35  
36  
37  
38  
39  
40  
41  
42  
43  
44  
45  
46  
47  
48  
49  
50  
51  
52  
53  
54  
55  
56  
57  
58  
59  
60
- 20 19. Lu GC, Goldenberg RL, Cliver SP, Kreaden US, Andrews WW. Vaginal fetal  
21 fibronectin levels and spontaneous preterm birth in symptomatic women.  
22  
23  
24  
25  
26  
27  
28  
29  
30  
31  
32  
33  
34  
35  
36  
37  
38  
39  
40  
41  
42  
43  
44  
45  
46  
47  
48  
49  
50  
51  
52  
53  
54  
55  
56  
57  
58  
59  
60
- 23 20. Gomez R, Romero R, Medina L, et al. Cervicovaginal fibronectin improves the  
24 prediction of preterm delivery based on sonographic cervical length in patients  
25 with preterm uterine contractions and intact membranes. *Am J Obstet*  
26  
27  
28  
29  
30  
31  
32  
33  
34  
35  
36  
37  
38  
39  
40  
41  
42  
43  
44  
45  
46  
47  
48  
49  
50  
51  
52  
53  
54  
55  
56  
57  
58  
59  
60
- 27 21. Abbott DH, NL. Seed, PT. Bennett, PR. Chandiramani, M. David, AL. Girling, J,  
28 Norman, JE. Stock, SJ. Tribe, RM. Shennan, AH. EQUIPP: Evaluation of

- 1 Fetal Fibronectin with a novel bedside Quantitative Instrument for the  
2 Prediction of Preterm birth. Arch Dis Child Fetal Neonatal Ed 2014;99:A150-  
3 A51
- 4 22. Abbott DS, Radford SK, Seed PT, Tribe RM, Shennan AH. Evaluation of a  
5 quantitative fetal fibronectin test for spontaneous preterm birth in symptomatic  
6 women. Am J Obstet Gynecol 2013;208(2):122 e1-6
- 7 23. Bruijn MM, Kamphuis EI, Hoesli IM, et al. The predictive value of quantitative  
8 fibronectin testing in combination with cervical length measurement in  
9 symptomatic women. Am J Obstet Gynecol 2016;215(6):793 e1-93 e8
- 10 24. Bruijn M, Vis JY, Wilms FF, et al. Quantitative fetal fibronectin testing in  
11 combination with cervical length measurement in the prediction of  
12 spontaneous preterm delivery in symptomatic women. BJOG  
13 2016;123(12):1965-71
- 14 25. Whiting PF, Rutjes AW, Westwood ME, et al. QUADAS-2: a revised tool for the  
15 quality assessment of diagnostic accuracy studies. Ann Intern Med  
16 2011;155(8):529-36
- 17 26. Hayden JA, van der Windt DA, Cartwright JL, Cote P, Bombardier C. Assessing  
18 bias in studies of prognostic factors. Ann Intern Med 2013;158(4):280-6
- 19 27. Moons KG, de Groot JA, Bouwmeester W, et al. Critical appraisal and data  
20 extraction for systematic reviews of prediction modelling studies: the  
21 CHARMS checklist. PLoS Med 2014;11(10):e1001744
- 22 28. Vergouwe Y, Steyerberg EW, Eijkemans MJ, Habbema JD. Substantial effective  
23 sample sizes were required for external validation studies of predictive logistic  
24 regression models. J Clin Epidemiol 2005;58(5):475-83
- 25 29. Vittinghoff E, McCulloch CE. Relaxing the rule of ten events per variable in  
26 logistic and Cox regression. Am J Epidemiol 2007;165(6):710-8

- 1 30. Haas DM, Imperiale TF, Kirkpatrick PR, Klein RW, Zollinger TW, Golichowski  
2 AM. Tocolytic therapy: a meta-analysis and decision analysis. *Obstet Gynecol*  
3 2009;113(3):585-94  
4  
5 31. Steyerberg EW, Harrell FE, Jr., Borsboom GJ, Eijkemans MJ, Vergouwe Y,  
6 Habbema JD. Internal validation of predictive models: efficiency of some  
7 procedures for logistic regression analysis. *J Clin Epidemiol* 2001;54(8):774-  
8 81  
9  
10 32. National Institute for Clinical Excellence (NICE) Guide to the methods of  
11 technology appraisal 2013.  
12 <https://www.nice.org.uk/process/pmg9/chapter/the-reference-case> (accessed  
13 23<sup>rd</sup> November 2017).  
14  
15 33. <https://www.tommys.org> (accessed 23<sup>rd</sup> November 2017)  
16  
17  
18  
19  
20  
21  
22  
23  
24  
25  
26  
27  
28  
29  
30  
31  
32  
33  
34  
35  
36  
37  
38  
39  
40  
41  
42  
43  
44  
45  
46  
47  
48  
49  
50  
51  
52  
53  
54  
55  
56  
57  
58  
59  
60

# BMJ Open

## Study Protocol: Quantitative Fibronectin to help Decision-making in women with Symptoms of Preterm Labour (QUIDS) Part Two- Prospective Cohort Study

|                                 |                                                                                                                                                                                                                                                                                                                                                                                                                                                                                                                                                                                                                                                                                                                                                                                                                                                                                                                                                                                                                                                                                                                                                                                                                                                                                                                                                                                                                                                                                                                                                                                                                                                                                                                                                                                     |
|---------------------------------|-------------------------------------------------------------------------------------------------------------------------------------------------------------------------------------------------------------------------------------------------------------------------------------------------------------------------------------------------------------------------------------------------------------------------------------------------------------------------------------------------------------------------------------------------------------------------------------------------------------------------------------------------------------------------------------------------------------------------------------------------------------------------------------------------------------------------------------------------------------------------------------------------------------------------------------------------------------------------------------------------------------------------------------------------------------------------------------------------------------------------------------------------------------------------------------------------------------------------------------------------------------------------------------------------------------------------------------------------------------------------------------------------------------------------------------------------------------------------------------------------------------------------------------------------------------------------------------------------------------------------------------------------------------------------------------------------------------------------------------------------------------------------------------|
| Journal:                        | <i>BMJ Open</i>                                                                                                                                                                                                                                                                                                                                                                                                                                                                                                                                                                                                                                                                                                                                                                                                                                                                                                                                                                                                                                                                                                                                                                                                                                                                                                                                                                                                                                                                                                                                                                                                                                                                                                                                                                     |
| Manuscript ID                   | bmjopen-2017-020795.R1                                                                                                                                                                                                                                                                                                                                                                                                                                                                                                                                                                                                                                                                                                                                                                                                                                                                                                                                                                                                                                                                                                                                                                                                                                                                                                                                                                                                                                                                                                                                                                                                                                                                                                                                                              |
| Article Type:                   | Protocol                                                                                                                                                                                                                                                                                                                                                                                                                                                                                                                                                                                                                                                                                                                                                                                                                                                                                                                                                                                                                                                                                                                                                                                                                                                                                                                                                                                                                                                                                                                                                                                                                                                                                                                                                                            |
| Date Submitted by the Author:   | 07-Feb-2018                                                                                                                                                                                                                                                                                                                                                                                                                                                                                                                                                                                                                                                                                                                                                                                                                                                                                                                                                                                                                                                                                                                                                                                                                                                                                                                                                                                                                                                                                                                                                                                                                                                                                                                                                                         |
| Complete List of Authors:       | <p>Stock, Sarah; University of Edinburgh MRC Centre for Reproductive Health, Tommy's Centre for Maternal and Fetal Health; University of Western Australia School of Women's and Infant's Health,<br/>         Wotherspoon, Lisa; University of Edinburgh MRC Centre for Reproductive Health, Tommy's Centre for Maternal and Fetal Health<br/>         Boyd, Kathleen; University of Glasgow, Health Economics &amp; Health Technology Assessment<br/>         Morris, R. K.; Univ Birmingham, School of Clinical and Experimental Medicine<br/>         Dorling, Jon; Queen's Medical Centre, Neonatal Unit<br/>         Jackson, Lesley; Royal Hospital for Children Glasgow, Neonatal Unit<br/>         Chandiramani, Manju; Imperial College Healthcare NHS Trust, Queen Charlotte and Chelsea Hospital, Du Cane Road, Shepherds Bush, London, W12 0HS<br/>         David, Anna; University College London Medical School, Institute for Womens Health<br/>         Khalil, Asma; St. George's Medical School, University of London<br/>         Shennan, Andrew; Kings College London, Maternal and Fetal Research Unit<br/>         Hodgetts Morton, Victoria ; Birmingham Women's Hospital, Metchley Park Road, Edgbaston, ,<br/>         Lavender, Tina; Manchester University<br/>         Khan, Khalid; Queen Mary, University of London, Centre for Primary Care and Public Health<br/>         Harper-Clarke, Susan; PPI Representative<br/>         Mol, Ben; University of Adelaide, The Robinson Institute, School of Paediatrics and Reproductive Health<br/>         Riley, Richard; Keele University<br/>         Norrie, John; Edinburgh Clinical Trials Unit, University of Edinburgh No. 9, Bioquarter<br/>         Norman, Jane; University of Edinburgh</p> |
| <b>Primary Subject Heading</b>: | Obstetrics and gynaecology                                                                                                                                                                                                                                                                                                                                                                                                                                                                                                                                                                                                                                                                                                                                                                                                                                                                                                                                                                                                                                                                                                                                                                                                                                                                                                                                                                                                                                                                                                                                                                                                                                                                                                                                                          |
| Secondary Subject Heading:      | Health economics, Diagnostics                                                                                                                                                                                                                                                                                                                                                                                                                                                                                                                                                                                                                                                                                                                                                                                                                                                                                                                                                                                                                                                                                                                                                                                                                                                                                                                                                                                                                                                                                                                                                                                                                                                                                                                                                       |
| Keywords:                       | Pregnancy, Preterm Birth, Fetal Fibronectin, Cervix, Diagnostic Test                                                                                                                                                                                                                                                                                                                                                                                                                                                                                                                                                                                                                                                                                                                                                                                                                                                                                                                                                                                                                                                                                                                                                                                                                                                                                                                                                                                                                                                                                                                                                                                                                                                                                                                |
|                                 |                                                                                                                                                                                                                                                                                                                                                                                                                                                                                                                                                                                                                                                                                                                                                                                                                                                                                                                                                                                                                                                                                                                                                                                                                                                                                                                                                                                                                                                                                                                                                                                                                                                                                                                                                                                     |



1  
2  
3  
4  
5  
6  
7  
8  
9  
10  
11  
12  
13  
14  
15  
16  
17  
18  
19  
20  
21  
22  
23  
24  
25  
26  
27  
28  
29  
30  
31  
32  
33  
34  
35  
36  
37  
38  
39  
40  
41  
42  
43  
44  
45  
46  
47  
48  
49  
50  
51  
52  
53  
54  
55  
56  
57  
58  
59  
60

SCHOLARONE™  
Manuscripts

For peer review only

1  
2  
3 **1 Study Protocol: Quantitative Fibronectin to help Decision-making in women**  
4 **2 with Symptoms of Preterm Labour (QUIDS) Part Two- Prospective Cohort**  
5 **3 Study**

6  
7  
8  
9 4 Sarah J Stock\*<sup>1,2</sup> Sarah.Stock@ed.ac.uk  
10  
11 5 Lisa Wotherspoon<sup>1</sup> Lisa.Wotherspoon@ed.ac.uk  
12  
13 6 Kathleen Boyd<sup>3</sup> Kathleen.Boyd@glasgow.ac.uk  
14  
15 7 Rachel K Morris<sup>4</sup> r.k.morris@bham.ac.uk  
16  
17 8 Jon Dorling<sup>5</sup> Jon.Dorling@nottingham.ac.uk  
18  
19 9 Lesley Jackson<sup>6</sup> Lesley.Jackson@ggc.scot.nhs.uk  
20  
21 10 Manju Chandiramani<sup>7</sup> m.chandiramani@imperial.ac.uk  
22  
23 11 Anna David<sup>8</sup> a.david@ucl.ac.uk  
24  
25 12 Asma Khalil<sup>9</sup> akhalil@sgul.ac.uk  
26  
27 13 Andrew Shennan<sup>10</sup> andrew.shennan@kcl.ac.uk  
28  
29 14 Victoria Hodgetts-Morton<sup>4</sup> v.a.h.morton@bham.ac.uk  
30  
31 15 Tina Lavender<sup>11</sup> Tina.Lavender@manchester.ac.uk  
32  
33 16 Khalid Khan<sup>12</sup> k.s.khan@qmul.ac.uk  
34  
35 17 Susan Harper-Clarke<sup>13</sup> su\_clarke@hotmail.com  
36  
37 18 Ben Mol<sup>14</sup> ben.mol@adelaide.edu.au  
38  
39 19 Richard D. Riley<sup>15</sup> r.riley@keele.ac.uk  
40  
41 20 John Norrie<sup>16</sup> J.Norrie@ed.ac.uk  
42  
43 21 Jane Norman<sup>1</sup> Jane.Norman@ed.ac.uk

44 22 1. Tommy's Centre for Maternal and Fetal Health, University of Edinburgh MRC  
45 23 Centre for Reproductive Health, Queen's Medical Research Institute, Edinburgh, UK.  
46  
47 24 2. School of Women's and Infants' Health, University of Western Australia, Crawley  
48  
49 25 WA 6009, AUS. 3. Institute of Health & Wellbeing Health Economics & Health  
50  
51 26 Technology Assessment, University of Glasgow, 1 Lilybank Gardens, Glasgow, UK.  
52  
53 27 4. School of Clinical and Experimental Medicine, University of Birmingham,  
54  
55 28 Birmingham, UK. 5. Queen's Medical Centre, Neonatal Unit, Derby Road,

1  
2  
3 1 Nottingham, UK. 6. Royal Hospital for Children Glasgow, Neonatal Unit  
4  
5 2 Glasgow, UK. 7. Imperial College Healthcare NHS Trust, Queen Charlotte and  
6  
7 3 Chelsea Hospital, Du Cane Road, Shepherds Bush, London, UK. 8. University  
8  
9 4 College London Medical School, Institute for Women's Health Health, 86-96 Chenies  
10  
11 5 Mews, University College London Medical School London, UK. 9. St. George's  
12  
13 6 Medical School, University of London, London, UK. 10. Kings College London,  
14  
15 7 Maternal and Fetal Research Unit Maternal and Fetal Research Unit 10th Floor,  
16  
17 8 North Wing London, UK. 11. University of Manchester School of Nursing, Midwifery &  
18  
19 9 Social Work, Jean McFarlane Building, University Place, Oxford Road  
20  
21 10 Manchester, UK. 12. Queen Mary, University of London, Centre for Primary Care and  
22  
23 11 Public Health London, UK. 13. Patient and Public Involvement Representative. No  
24  
25 12 affiliation. 14. University of Adelaide, The Robinson Institute, School of Paediatrics  
26  
27 13 and Reproductive Health Adelaide, SA, AUS. 15. Research Institute for Primary Care  
28  
29 14 and Health Sciences, Keele University, Keele, UK. 16. Edinburgh Clinical Trials Unit,  
30  
31 15 University of Edinburgh No. 9, Bioquarter Edinburgh, UK.

32  
33 16

34  
35 17 \*Corresponding Author: Dr Sarah J Stock Senior Clinical Lecturer Maternal and Fetal  
36  
37 18 Medicine, MRC Centre for Reproductive Health, Queen's Medical Research Institute,  
38  
39 19 47 Little France Crescent, Edinburgh, EH16 4TJ. Tel: 0131 242 6449 Email:  
40  
41 20 [sarah.stock@ed.ac.uk](mailto:sarah.stock@ed.ac.uk)

42  
43 21

44  
45 22 **Word Count:** 4,928

46  
47 23 **Key Words:** Pregnancy; Preterm Birth; Fetal Fibronectin; Cervix; Diagnostic Test.

48  
49 24

50  
51 25

## 1       2       3       4       5       6       7       8       9       10       11       12       13       14       15       16       17       18       19       20       21       22       23       24       25       26       27       28       29       30       31       32       33       34       35       36       37       38       39       40       41       42       43       44       45       46       47       48       49       50       51       52       53       54       55       56       57       58       59       60

### 1       2       3       4       5       6       7       8       9       10       11       12       13       14       15       16       17       18       19       20       21       22       23       24       25       26       27       28       29       30       31       32       33       34       35       36       37       38       39       40       41       42       43       44       45       46       47       48       49       50       51       52       53       54       55       56       57       58       59       60

## 1       2       3       4       5       6       7       8       9       10       11       12       13       14       15       16       17       18       19       20       21       22       23       24       25       26       27       28       29       30       31       32       33       34       35       36       37       38       39       40       41       42       43       44       45       46       47       48       49       50       51       52       53       54       55       56       57       58       59       60

### 1       2       3       4       5       6       7       8       9       10       11       12       13       14       15       16       17       18       19       20       21       22       23       24       25       26       27       28       29       30       31       32       33       34       35       36       37       38       39       40       41       42       43       44       45       46       47       48       49       50       51       52       53       54       55       56       57       58       59       60

2       3       4       5       6       7       8       9       10       11       12       13       14       15       16       17       18       19       20       21       22       23       24       25       26       27       28       29       30       31       32       33       34       35       36       37       38       39       40       41       42       43       44       45       46       47       48       49       50       51       52       53       54       55       56       57       58       59       60

2       3       4       5       6       7       8       9       10       11       12       13       14       15       16       17       18       19       20       21       22       23       24       25       26       27       28       29       30       31       32       33       34       35       36       37       38       39       40       41       42       43       44       45       46       47       48       49       50       51       52       53       54       55       56       57       58       59       60

6       7       8       9       10       11       12       13       14       15       16       17       18       19       20       21       22       23       24       25       26       27       28       29       30       31       32       33       34       35       36       37       38       39       40       41       42       43       44       45       46       47       48       49       50       51       52       53       54       55       56       57       58       59       60

6       7       8       9       10       11       12       13       14       15       16       17       18       19       20       21       22       23       24       25       26       27       28       29       30       31       32       33       34       35       36       37       38       39       40       41       42       43       44       45       46       47       48       49       50       51       52       53       54       55       56       57       58       59       60

18       19       20       21       22       23       24       25       26       27       28       29       30       31       32       33       34       35       36       37       38       39       40       41       42       43       44       45       46       47       48       49       50       51       52       53       54       55       56       57       58       59       60

18       19       20       21       22       23       24       25       26       27       28       29       30       31       32       33       34       35       36       37       38       39       40       41       42       43       44       45       46       47       48       49       50       51       52       53       54       55       56       57       58       59       60

21       22       23       24       25       26       27       28       29       30       31       32       33       34       35       36       37       38       39       40       41       42       43       44       45       46       47       48       49       50       51       52       53       54       55       56       57       58       59       60

21       22       23       24       25       26       27       28       29       30       31       32       33       34       35       36       37       38       39       40       41       42       43       44       45       46       47       48       49       50       51       52       53       54       55       56       57       58       59       60

23       24       25       26       27       28       29       30       31       32       33       34       35       36       37       38       39       40       41       42       43       44       45       46       47       48       49       50       51       52       53       54       55       56       57       58       59       60

23       24       25       26       27       28       29       30       31       32       33       34       35       36       37       38       39       40       41       42       43       44       45       46       47       48       49       50       51       52       53       54       55       56       57       58       59       60

## 25       26       27       28       29       30       31       32       33       34       35       36       37       38       39       40       41       42       43       44       45       46       47       48       49       50       51       52       53       54       55       56       57       58       59       60

### 25       26       27       28       29       30       31       32       33       34       35       36       37       38       39       40       41       42       43       44       45       46       47       48       49       50       51       52       53       54       55       56       57       58       59       60

### 26       27       28       29       30       31       32       33       34       35       36       37       38       39       40       41       42       43       44       45       46       47       48       49       50       51       52       53       54       55       56       57       58       59       60

#### 26       27       28       29       30       31       32       33       34       35       36       37       38       39       40       41       42       43       44       45       46       47       48       49       50       51       52       53       54       55       56       57       58       59       60

- 27       28       29       30       31       32       33       34       35       36       37       38       39       40       41       42       43       44       45       46       47       48       49       50       51       52       53       54       55       56       57       58       59       60
- 27       28       29       30       31       32       33       34       35       36       37       38       39       40       41       42       43       44       45       46       47       48       49       50       51       52       53       54       55       56       57       58       59       60

- 1
- 2
- 3 • Health Economic Analysis to determine cost effectiveness from NHS
- 4 perspective
- 5
- 6
- 7
- 8
- 9

#### 4 **Limitations**

- 10 • Not a randomized control trial to test effectiveness of the model on improved
- 11 patient outcomes
- 12
- 13
- 14
- 15
- 16

#### 8 **HOW PATIENTS ARE INVOLVED IN THIS STUDY**

9 Patient representatives were consulted during the protocol development and

10 have been invited to join the Project Management Group and the Trial Steering

11 Committee. Prior to commencing QUIDS, we performed a qualitative study to

12 determine the decisional needs of pregnant women with signs and symptoms of

13 preterm labour, their partners and their caregivers. This is described in the

14 separate protocol “QUIDS Qualitative” (Supplementary Material). The end

15 product of QUIDS will be a decision support aid to help clinicians, women and

16 their partners decide on management of threatened preterm labour, based on the

17 results of the quantitative fFN. In QUIDS Qualitative women and clinicians

18 indicated that they would prefer this to be on web based or mobile app based

19 format, presenting the risk of preterm birth within seven days of testing.

20

21

## 1 INTRODUCTION

2 The overall aim of the QUIDS study is to develop a decision support tool for the  
3 management of women with symptoms and signs of preterm labour, based on a  
4 validated prognostic model using quantitative fFN testing. The study has been  
5 conceptually divided into two parts. In this, the protocol for QUIDS Part Two, we  
6 detail the protocol for a prospective cohort study. This will externally validate a  
7 prognostic model developed in QUIDS Part One.[1] More detailed background about  
8 the diagnosis of preterm labour and background to the study is provided in the  
9 introduction of QUIDS Protocol Part One.[1]

10

11 Fetal Fibronectin (fFN) is a biochemical test of preterm labour which has potential to  
12 help improve diagnosis of impending preterm delivery.[2] Much of the evidence about  
13 fFN to date relates to the qualitative fFN test, which provides a positive or negative  
14 result on the basis of a single threshold of 50ng/ml.[2,3] This test has been largely  
15 replaced with the Rapid fFN 10Q System, which provides a concentration of fFN  
16 (quantitative fFN), and as a continuous variable, may be a more useful predictor of  
17 preterm delivery. fFN is now only available with a quantitative analyser in the UK, but  
18 there is no consensus as to which women to use the test in, or how to interpret the  
19 results.

20

21 The QUIDS study will address this evidence gap by providing evidence about the  
22 potential value of the quantitative fFN test, along with guidance about how to  
23 interpret results. Here we detail the protocol for external validation of a prognostic  
24 model developed in QUIDS Part One.[1]

25

## 26 METHODS AND ANALYSIS

### 27 Aims and Methodologies

1  
2  
3 1 The aim of the QUIDS study is to develop a decision support tool for the  
4  
5 2 management of women with symptoms and signs of preterm labour, based on a  
6  
7 3 validated prognostic model using quantitative fFN testing.  
8  
9 4

10  
11 5 The study protocol has been divided into two parts (see flow chart Figure 1). The  
12  
13 6 protocols for Parts One and Two are reported in separate manuscripts.  
14  
15 7

16  
17 8 In QUIDS Protocol Part One we have described how we will perform (i) an Individual  
18  
19 9 Participant Data (IPD) meta-analysis, and (ii) and Economic Analysis. The protocol  
20  
21 10 details how we will develop and internally validate a prognostic model using  
22  
23 11 quantitative fFN (as a continuous variable) and other risk (prognostic) factors and to  
24  
25 12 evaluate the added value of quantitative fFN toward this prognostic model  
26  
27 13 performance. We will also provide an economic rationale for the prognostic model  
28  
29 14 and analyze its cost-effectiveness from the perspective of the NHS.  
30  
31 15

32  
33 16 In this, the QUIDS Protocol Part Two, we will detail the prospective cohort study to  
34  
35 17 externally validate and, if necessary, refine the prognostic model. This will be  
36  
37 18 performed in at least eight UK hospitals with different settings (rural/urban) and  
38  
39 19 different levels of neonatal care facilities. In addition, acceptability of quantitative fFN  
40  
41 20 testing, and effects on maternal anxiety will be performed. We will assess the  
42  
43 21 potential cost-effectiveness of the final prognostic model/decision support tool. This  
44  
45 22 additional analysis will allow us to model the full costs and effect impacts of the  
46  
47 23 different prognostic model and compare these in a cost-effectiveness analysis to  
48  
49 24 provide an evidence-based economic rationale for implementing the diagnostic tool  
50  
51 25 in the NHS.  
52  
53 26

## 54 27 **Endpoints**

55  
56  
57  
58  
59  
60

1  
2  
3 1 The primary endpoint of the prognostic model is spontaneous preterm delivery within  
4  
5 2 seven days of qfFN test, in women less than 36 weeks' gestation. This was  
6  
7 3 influenced by the preceding QUIDS Qualitative Study, which included focus group  
8  
9 4 consultation to determine the decisional needs of women, their partners and  
10  
11 5 clinicians (Supplementary Material). It is also a recognised clinically important  
12  
13 6 endpoint, as antenatal steroids (which significantly reduce morbidity and mortality in  
14  
15 7 preterm babies[4]) are most effective if delivery occurs within seven days of  
16  
17 8 administration.

18  
19 9  
20  
21 10 A secondary endpoint suggested by QUIDS Qualitative Study (Supplementary  
22  
23 11 Material) consultation, was delivery within 48 hours of qfFN test. This analysis will be  
24  
25 12 performed if feasible to do so within the constraints of the data available for model  
26  
27 13 development and validation.[1]

#### 28 29 14 30 31 15 **Health technologies being assessed**

32  
33 16 The trial will evaluate the Rapid fFN 10Q System (Hologic, Malboroughm MA). This  
34  
35 17 provides a concentration of fFN (ng/ml or INVALID) in a vaginal swab sample in 10  
36  
37 18 minutes. It is now the only commercially available fFN test system, and replaces the  
38  
39 19 TLiQ rapid analyser system, which provided a qualitative fFN result (POSITIVE or  
40  
41 20 NEGATIVE) based on a threshold of 50ng/ml. The Rapid fFN 10Q system is a point  
42  
43 21 of care test, which clinical staff can easily perform. All reagents for fFN testing can be  
44  
45 22 stored at room temperature and specimen collection kits, reagents, cassettes and the  
46  
47 23 10Q analyzer can be kept in clinical areas where women with symptoms of preterm  
48  
49 24 labour are assessed so they can be conveniently accessed.

50  
51 25  
52  
53 26 Vaginal swab samples are analysed by lateral flow; solid-phase  
54  
55 27 immunochromatographic assay (the Rapid fFN Cassette), and interpreted in the 10Q  
56  
57 28 Rapid analyser. 200  $\mu$ L of the sample is pipetted into the sample application well of



1 the Rapid fFN Cassette using a polypropylene or polyethylene pipette. The sample  
2 will then flow from an absorbent pad across a nitrocellulose membrane via capillary  
3 action through a reaction zone containing murine monoclonal anti-fetal fibronectin  
4 antibody conjugated to blue microspheres (conjugate). The conjugate, embedded in  
5 the membrane, will be mobilized by the flow of the sample. The sample will then flow  
6 through a zone containing goat polyclonal antihuman fibronectin antibody that  
7 captures the fibronectin-conjugate complexes. The remaining sample will flow  
8 through a zone containing goat polyclonal anti-mouse IgG antibody that captures  
9 unbound conjugate, resulting in a control line. After 10 minutes of reaction time, the  
10 intensities of the test line and control line are interpreted with the 10Q Rapid analyser  
11 and a printed result provided as a concentration in ng/ml (0->500ng/ml) or INVALID.  
12 The result is invalid if the test does not meet internal quality controls that are  
13 performed automatically with every test. In the event of an invalid result, the test can  
14 be repeated with any remaining clinical specimen. A quality control can be performed  
15 by a reusable Rapid fFN 10Q QCette® QC Device, which verifies that the analyser  
16 performance is within specification.

## 17

### 18 **Target population**

19 The target population is pregnant women attending hospital with signs and  
20 symptoms of preterm labour.

## 21

### 22 **Validation And Refinement Of Prognostic Model**

#### 23 **Population**

24 The prospective cohort study will include women with signs and symptoms of  
25 preterm labour at 22<sup>+0</sup> to 34<sup>+6</sup> weeks gestation in whom admission, transfer or  
26 treatment is being considered. These will be recruited from at least eight sites with a  
27 mix of rural/urban settings, and have different levels of neonatal care facilities, over  
28 12 months.

1  
2  
3 1  
4  
5 2 Eligibility Criteria

6  
7 3 The following inclusion criteria will apply at screening assessment (all apply):

- 8  
9 4 • Women who are 22<sup>+0</sup> to 34<sup>+6</sup> weeks (or earlier gestation if the fetus is  
10  
11 considered potentially viable).  
12  
13 6 • Women showing signs and symptoms of pre-term labour which may include  
14  
15 7 any or all of back pain, abdominal cramping, abdominal pain, light vaginal  
16  
17 8 bleeding, vaginal pressure, uterine tightenings or contractions.  
18  
19 9 • Women where hospital admission, interhospital transfer or treatment  
20  
21 10 (antenatal steroids, tocolysis or magnesium sulphate) is being considered due  
22  
23 11 to signs of pre-term labour.  
24  
25 12 • Women aged 16 years or above.

26  
27 13 The broad inclusion criteria reflect current clinical practice and enable the  
28  
29 14 generalisability of the results of the trial for routine clinical care. We will include  
30  
31 15 women who re-attend seven days or more after initial recruitment with signs and  
32  
33 16 symptoms of preterm labour and also women who remain symptomatic but  
34  
35 17 undelivered seven days later in whom repeat testing by the clinician is deemed to be  
36  
37 18 appropriate. This will be in line with manufacturer's recommendation for fFN testing.

38  
39  
40  
41 20 The following inclusion criteria will apply on speculum examination:

- 42  
43 21 • Cervical dilation  $\leq$  3cm  
44  
45 22 • Intact membranes  
46  
47 23 • No significant vaginal bleeding, as judged by the clinician.  
48  
49 24 • Once it has been established that the women meets the above criteria, on  
50  
51 25 speculum examination, the fFN swab can be taken.

52  
53 26 Participants that sign the consent but are not eligible upon examination to have an  
54  
55 27 fFN swab taken will still be enrolled and have outcome data collected.

1  
2  
3 14  
5 2 The following exclusion criteria will apply:

- 6  
7 3 • Contraindication to vaginal examination (e.g. placenta praevia).
- 8  
9 4 • Higher order multiple pregnancy (triplets or more).
- 10  
11 5 • Moderate or severe vaginal bleeding.
- 12  
13 6 • Cervical dilatation greater than 3cm.
- 14  
15 7 • Confirmed rupture of membranes.
- 16  
17 8 • Sexual intercourse, vaginal examination or transvaginal ultrasound in the
- 18  
19 9 preceding 24 hours factors may invalidate results. These women will be
- 20  
21 10 initially excluded from the study, but can be included if still symptomatic after
- 22  
23 11 24 hours, when fFN accuracy will be restored.

24  
25 1226  
27 13 Co-Enrolment

28  
29 14 This trial involves validating a decision support tool relating to a test that is currently  
30  
31 15 commonly used in clinical practice. As such, there are no additional interventions.  
32  
33 16 Co-enrolment in other non-interventional trials will be allowed. Co-enrolment in trials  
34  
35 17 of tocolytic treatments or other management strategies that may influence timing of  
36  
37 18 delivery as a primary outcome will not be allowed. Participation in QUIDs would not  
38  
39 19 preclude babies being subsequently involved in interventional trials. Co-enrolment  
40  
41 20 will be recorded in the electronic case report form (eCRF).

42  
43 2144  
45 22 Setting

46  
47 23 The prospective cohort study will take place in at least eight consultant-led obstetric  
48  
49 24 units in the UK. More than 93% of pregnant women in the UK deliver in consultant-  
50  
51 25 led units.[5,6] The vast majority of women with symptoms of preterm labour will  
52  
53 26 present to a consultant-led unit for assessment, either directly or following advice  
54  
55 27 from their community midwife or General Practitioner.

1  
2  
3 1  
4  
5 2 The study will not include any community maternity units (staffed by midwives, with  
6  
7 3 or without involvement of non-obstetric medical staff), which cover a small proportion  
8  
9 4 of women, mainly in remote and rural areas. In the Perinatal Collaborative Transport  
10  
11 5 Study (CoTS study) of perinatal transfers in Scotland,[7] which involved 52,727  
12  
13 6 births, only 69 (0.13%) women were transferred to a consultant-led obstetric unit  
14  
15 7 from community maternity units, and only a proportion of these were for suspected  
16  
17 8 preterm labour. The small number of women cared for in community maternity units  
18  
19 9 means their inclusion would not be an efficient use of study resources.

20  
21 10  
22  
23 11 Given that management of women with symptoms of preterm labour and inter-  
24  
25 12 hospital transfer patterns are likely to vary depending on level of available neonatal  
26  
27 13 care and distance to transfer, we will include a mixture of hospitals with different  
28  
29 14 levels of neonatal care facilities in both rural and urban settings. We will include units  
30  
31 15 with Special Care Units (providing special care for their own local population), Local  
32  
33 16 Neonatal Units (providing special care and high dependency care and a restricted  
34  
35 17 volume of intensive care) and Neonatal Intensive Care Units (larger intensive care  
36  
37 18 units providing the whole range of medical, and sometimes surgical neonatal care for  
38  
39 19 their local population and for babies and their families referred from the neonatal  
40  
41 20 network in which they are based, and other networks when necessary). The hospitals  
42  
43 21 will be chosen from different geographical settings (rural/urban) and from different  
44  
45 22 regions of the UK.

46  
47 23  
48  
49 24 If additional units wish to participate in the study we will consider including them, to  
50  
51 25 increase recruitment rates. The UK Reproductive Health and Childbirth specialty  
52  
53 26 group (clinical study group) have contributed to the study protocol and support the  
54  
55 27 proposed trial.

56  
57 28  
58  
59  
60

## 1 Participant Selection And Enrolment

2 Women with signs and symptoms of preterm labour will be identified on presentation  
3 to obstetric services. A member of clinical staff, usually the doctor or midwife  
4 assessing the woman, will identify potentially eligible participants, provide a  
5 participant information leaflet and invite consent. A suitably trained member of clinical  
6 staff (doctor or midwife) or research team will consent participants.

7  
8 Posters and leaflets will be situated in antenatal areas of participating hospitals to  
9 alert women that the study is taking place, and women will be allowed as much time  
10 as possible to consider participation without unduly delaying further clinical  
11 assessment. Participants will receive adequate oral and written information and  
12 appropriate participant information and informed consent forms will be provided.

## 14 Screening For Eligibility

15 The clinical likelihood of preterm delivery is usually evaluated by history and  
16 examination, which includes abdominal palpation, to assess strength and frequency  
17 of uterine contractions. If preterm labour is suspected, a vaginal speculum  
18 examination is performed where the cervix is inspected for dilatation, and evidence of  
19 vaginal bleeding and membrane rupture assessed. Swabs for fFN are usually taken  
20 at this point. Potential participants in the QUIDS study will be identified after the initial  
21 assessment and provided with information about the study. A combined 'Screening  
22 and Consent Form' will be used as a self-screening tool for potentially eligible  
23 participants. Informed consent will take place before speculum examination and the  
24 fFN swab has been taken. This approach means that samples are collected at  
25 routine speculum examination, as they would be if fFN is implemented in clinical  
26 practice, and participants avoid an additional vaginal examination.

## 28 Ineligible And Non-Recruited Participants

1  
2  
3 1 Certain exclusion criteria can only be assessed at speculum examination (for  
4 2 example vaginal bleeding or evidence of ruptured membranes), so a proportion of  
5 3 women will not be eligible for fFN testing after consent is given. These women will  
6 4 still be enrolled and delivery outcomes collected. The decision whether to use this  
7 5 data for analysis will be the decision of the Chief Investigator and Statisticians.  
8  
9  
10  
11  
12  
13

#### 14 7 Withdrawal Of Study Participants

15 8 Women will be able to withdraw consent for us of their data at any time until the end  
16 9 of the study.  
17  
18  
19  
20  
21

#### 22 10 23 11 Study Assessments (See Table 1)

##### 24 12 *Eligibility Assessment (Screening And Recruitment)*

25 13 Women presenting with signs and symptoms of pre-term labour will be identified on  
26 14 presentation to obstetric services. The doctor or midwife assessing the woman will  
27 15 identify potentially eligible participants and provide an invitation letter and short  
28 16 information leaflet.  
29  
30  
31  
32  
33  
34

35 17  
36 18 After the woman has had the opportunity to consider whether she would like to  
37 19 participate, she will be asked to complete the Screening and Consent Form. The  
38 20 clinician will then decide whether the fFN test can be carried out. If the test can be  
39 21 carried out (according to manufacturer's guidelines), then the participant will be fully  
40 22 enrolled and that their delivery outcomes will still be collected.  
41  
42  
43  
44  
45  
46

47 23  
48 24 If the woman declines to participate and she is willing to provide a reason for this, the  
49 25 reason given will be entered on to an anonymous log. Baseline demographics will be  
50 26 collected on consenting women, together with height and weight, information on  
51 27 medical history, obstetric history, estimated date of delivery and presenting signs and  
52 28 symptoms.  
53  
54  
55  
56  
57  
58  
59  
60

1  
2  
3 1  
4  
5 2 The original consent form will be stored in the Investigator Site File (ISF) file, a copy  
6  
7 3 is given to the woman, a copy added to the medical notes and a copy sent to the  
8  
9 4 Trial Office.

10  
11 5  
12 6 After providing consent, the participant will be asked to complete a short State Trait  
13  
14 7 Anxiety Inventory (STAI) questionnaire and complete a contact details form. They will  
15  
16 8 also be issued with a letter thanking them for taking part in the trial and giving details  
17  
18 9 of the second questionnaire to be completed.

#### 10 11 *Sample Collection*

12 Samples for analysis will be taken with a fFN specimen collection kit, which consists  
13  
14 of a sterile polyester tipped swab and a specimen transport tube containing 1 ml  
15  
16 extraction buffer (an aqueous solution containing protease inhibitors and protein  
17  
18 preservatives including aprotinin, bovine serum albumin, and sodium azide). During  
19  
20 speculum examination the sterile swab will be lightly rotated across the posterior  
21  
22 fornix of the vagina for ten seconds to absorb vaginal secretions. Samples should be  
23  
24 taken before any other swabs (e.g. for microbiology) or cervical manipulation and the  
25  
26 speculum lubricated with normal saline as other lubricants may interfere with the  
27  
28 antibody-antigen reaction of the test. Following specimen collection the swab should  
29  
30 be removed, immersed in extraction buffer, the shaft of the swab snapped off, and  
31  
32 the transport tube sealed.

33  
34  
35  
36  
37  
38  
39  
40  
41  
42  
43  
44  
45  
46  
47  
48 24 Before analysis samples are gently mixed and as much liquid as possible expressed  
49  
50 25 from the swab by rolling the tip against the inside of the tube.

#### 51 52 53 54 27 *Initial fFN test*

1 The sample taken will be run at a near bedside Hologic Rapid fFN 10Q analyser,  
2 specially adapted for the QUIDS study. As fFN (or other similar biochemical tests of  
3 preterm labour) are part of standard care, it would be unethical to blind clinicians  
4 from the qualitative fFN result. The analyser will thus reveal a qualitative fFN result  
5 (positive/negative/invalid) for clinicians to base clinical decision-making on, according  
6 to local protocols. The quantitative fFN result however, will be stored as a three-letter  
7 code, blinding caregivers from the result. Samples will be run as per manufacturers  
8 instructions (described above in the section "Health technologies being assessed").  
9

#### 10 *Repeat fFN Tests*

11 If there is clinical indication for further fFN tests (eg because of ongoing symptoms of  
12 preterm labour after seven days), the results will also be recorded.  
13

#### 14 *Labour/Delivery/ Neonatal Assessments*

15 Admission for delivery will not be a formal study visit but data will be collected using  
16 information recorded in the participant's notes. Delivery data will be collected on the  
17 maternal outcomes of delivery, including method of delivery, indication for delivery  
18 method, onset of labour, date and gestation of delivery and blood loss.  
19

#### 20 *Questionnaires*

21 All participants who are eligible to participate will be asked to complete a STAI  
22 questionnaire before the speculum examination. The same questionnaire will be  
23 repeated 24-48 hours post examination. The second questionnaire will be provided  
24 on paper with a pre-paid envelope to be returned by post to the Trial Office. If not  
25 returned by post, the Trial Office may try to contact the participant (with the contact  
26 details provided), to complete the questionnaire over the phone.



1  
2  
3  
4  
5  
6  
7  
8  
9  
10  
11  
12  
13  
14  
15  
16  
17  
18  
19  
20  
21  
22  
23  
24  
25  
26  
27  
28  
29  
30  
31  
32  
33  
34  
35  
36  
37  
38  
39  
40  
41  
42  
43  
44  
45  
46  
47

| Visit                                                    | Attendance with signs and symptoms preterm labour |        |            |          |
|----------------------------------------------------------|---------------------------------------------------|--------|------------|----------|
|                                                          | Screening and Recruitment                         | 24-48h | 1-6 months | DELIVERY |
| Inclusion/Exclusion Criteria                             | ⊙                                                 |        |            |          |
| Participant Information Sheet                            | ⊙                                                 |        |            |          |
| Consent Form                                             | ⊙                                                 |        |            |          |
| Demographics                                             | ⊙                                                 |        |            |          |
| Obstetric History                                        | ⊙                                                 |        |            |          |
| Symptoms and Signs                                       | ⊙                                                 |        |            |          |
| Quantitative fFN (concentration ng/ml)                   | ⊙                                                 |        |            |          |
| Cervical length scan (if available)                      | ⊙                                                 |        |            |          |
| State Trait Anxiety Inventory Questionnaire              | ⊙                                                 | ⊙      |            |          |
| Delivery details                                         |                                                   |        |            | ⊙        |
| Neonatal outcomes                                        |                                                   |        |            | ⊙        |
| Qualitative Acceptability Questionnaires (subgroup n=30) |                                                   |        | ⊙          |          |

Table 1: QUIDS Study Assessments

## 1 Safety and Quality Assessments

2 The Hologic Rapid fFN 10Q analyzer has integrated quality control measures, and  
3 we will keep records of these as well as any additional staff training that occurs after  
4 the study starts. It is recommended that a daily pre-calibrated reusable quality control  
5 cassette be inserted and analysed every 24 hours to verify that the analyser  
6 performance is within specification. A daily quality control (QC) should be performed  
7 if one has not been done in the preceding 24 hours before a patient test is to be  
8 done. Logs of results are stored on the machine and can be downloaded, and we will  
9 also ask the participating sites to keep a monthly paper log of QC tests done. Each  
10 patient test has an internal quality control, with a procedural control line that verifies  
11 the threshold level of signal by the instrument. Sample flow detection ensures the  
12 sample travels across the cassette properly, and confirms absence of conjugate  
13 aggregation. We believe that these measures will help ensure the validity of results.  
14 However, to provide further evidence of integrity and comparability of results from  
15 each site we will request that all participating sites enrol in the Wales External Quality  
16 Assurance Scheme (WEQAS) Point of Care Quality Assurance Scheme. WEQAS will  
17 provide a sample for analysis to each site bimonthly, and provide reports on analyser  
18 performance and variability.[8]

## 19 Data Collection

### 20 *Data For Prognostic Model Validation and Update of Health Economic Model*

21 We will collect data on all of the candidate predictors considered for inclusion in the  
22 prognostic model developed in the IPD meta-analysis (quantitative fFN  
23 concentration, previous spontaneous preterm labour, gestation at fFN test, age,  
24 ethnicity, BMI, smoking, deprivation index, number of uterine contractions in set time  
25 period, cervical dilatation, vaginal bleeding, previous cervical treatment for cervical  
26 intraepithelial neoplasia, cervical length [measured by transvaginal cervical length;  
27 when available], singleton/multiple pregnancy, tocolysis and fetal sex). Outcome data  
28 will include gestational age at delivery, date and time of delivery, administration of  
29

1 treatments for preterm labour (steroids, antibiotics, tocolysis, magnesium sulphate)  
2 duration hospital admission, hospital transfer, onset of labour (preterm prelabour  
3 rupture of membranes; idiopathic preterm birth; medically indicated preterm birth [and  
4 indication]), place of delivery (base hospital, other hospital, outwith hospital), mode of  
5 delivery, neonatal admission, neonatal complications, perinatal mortality, congenital  
6 anomaly, sex and birthweight.

7  
8 Screening data and data about quantitative fFN testing will be collected on paper  
9 based CRFs and research midwives will input these into the web based electronic  
10 database. Clinical outcome data will be collected from the medical records.

#### 11 12 *Maternal Acceptability and Anxiety*

13 Maternal anxiety will be measured pre and post-test (24-48h) using the validated  
14 State Trait Anxiety Inventory (STAI) questionnaire. Acceptability of fFN testing and  
15 the decision support will be assessed using follow up interviews (face to face or  
16 telephone, according to maternal preference) which will be conducted with a sub-  
17 group of participants (n=30) purposively sampled and stratified according to  
18 geographical location, outcome (preterm labour or not) and anxiety scores.  
19 Acceptability will also be assessed in a cohort of clinicians (n=30).

#### 20 21 *Statistics and Sample Size Calculation*

22 Guidance for external validation suggests at least ten events (preterm delivery within  
23 seven days of test) are required for each covariate included in a prognostic  
24 model.[9,10] Data from the cohorts included in our IPD meta-analysis suggests an  
25 event rate of between 6 and 12%.[1] Based on these estimates a sample size of  
26 1,600 will provide 96 and 192 events (preterm delivery within 7 days).

27  
28 A UK study has shown that 8.9% of pregnant women present with symptoms of  
29 preterm labour and are eligible for quantitative fFN[11] and we anticipate 50%

1 recruitment rate is achievable, thus overall 4.5% of maternities could be recruited.  
2 We will initially include eight units in the cohort study with a combined delivery rate of  
3 approximately 36,000 per annum. We anticipate that we will achieve target  
4 recruitment within 12 months ( $1 \text{ year} * 36,000 * 0.089 * 0.5 = 1,602$ ). If however, the  
5 recruitment rate or event rate is lower than predicted, we will increase the number of  
6 sites included in the study and/or the recruitment period, to ensure that a minimum of  
7 60 events (preterm delivery within 7 days of test) are achieved, allowing for external  
8 validation of at least six covariates in our model.

9  
10 It is possible that the IPD meta-analysis will find there is potential added value of  
11 combining quantitative fFN testing with cervical length measurement.[12,13] As  
12 cervical length measurement has significant resource requirement (estimated NHS  
13 cost £68.16 per test) and lack of out of hours provision further limits availability in  
14 many NHS hospitals, we think it is very unlikely that cervical length scanning will  
15 improve performance of the prognostic model to such a degree as to make it cost  
16 effective. We will assess the incremental costs and effects of cervical length  
17 measurement in the proposed health economic model performed in parallel with the  
18 IPD meta-analysis, and will feed into design considerations during the first iteration of  
19 the prognostic model.

20  
21 If inclusion of cervical length ultrasound is found to be potentially cost-effective, we  
22 will assess the feasibility of including it in the prospective cohort study. We anticipate  
23 that including cervical length measurement in the prospective cohort study would be  
24 extremely difficult in the current NHS setting as the majority of units do not have 24  
25 hour availability of transvaginal ultrasound and/or trained personnel to perform scans.  
26 Inclusion of cervical length would also likely decrease recruitment rate (due to need  
27 for additional transvaginal ultrasound examination) and require significant additional  
28 resources.

29

1           1    Analysis

2           2    *Validation Of Prognostic Model*

3           3    The prognostic model developed in the IPD will be externally validated using data  
4           4    collected in the prospective cohort data, using the measures of discrimination and  
5           5    calibration described in QUIDS Protocol Part One,[1] including  $R^2$ , C statistic,  
6           6    calibration slope, calibration-in-the-large, and calibration plots of observed versus  
7           7    predicted risks across deciles (with Loess smoother). The average performance of  
8           8    the model will be summarised across the centers in the cohort study. Between-center  
9           9    heterogeneity in performance will also be summarised, and reduced (if necessary) by  
10          10   recalibration techniques regarding the strategy for the choice of baseline risk  
11          11   (intercept). That is, the predictor effects will not be modified from the IPD meta-  
12          12   analysis model, but the intercept may need to be tailored to improve validation in UK  
13          13   centers (e.g. for rural settings). Based on the findings, a final model and its  
14          14   implementation strategy will then be recommended for use.

15  
16          16    *Economic Analysis*

17          17    The economic model will be refined, integrated and updated with data from the  
18          18    prospective study cohort, so as the most up to date and validated evidence is used to  
19          19    inform a cost-effectiveness decision. Such an iterative approach to economic  
20          20    evaluation is now well established.[14,15] The care pathway following diagnosis will  
21          21    be included in the economic analysis, using data from the cohort study such as the  
22          22    diagnostic test accuracy data, resource use data (i.e. steroid use, other medications,  
23          23    time in hospital, hospital transfer) and secondary outcome data (i.e., treatment of  
24          24    side-effects, morbidity, mortality) so as to capture the full costs and effect impacts  
25          25    (quality of life, morbidity and mortality) for both the mother and baby. Resource use  
26          26    data will be combined with unit cost information from the British National  
27          27    Formulary[16] and NHS reference costs.[17,18] Outcomes will be reported as the  
28          28    incremental cost per correct diagnosis, and incremental cost per Quality Adjusted  
29          29    Life Year (QALY) gained of the qfFN prognostic model compared to current practice

1 (no qualitative fFN model). The analysis will adhere to the NICE reference case and  
2 the recommended guidelines for decision modeling and reporting of economic  
3 analyses.[18] Probabilistic sensitivity analysis will be undertaken to explore how  
4 uncertainty in the model inputs impact on the cost-effectiveness outcome.[19]

#### 5 *Acceptability of fFN Testing and Effects on Anxiety*

6 Maternal anxiety will be measured before and after quantitative fFN testing using the  
7 validated STAI. The STAI Form Y is a widely used tool for measuring both temporary  
8 "state anxiety" and the more general, long-standing "trait anxiety". The STAI is  
9 designed for the self-reported assessment of the intensity of feelings of  
10 apprehension, tension, nervousness, and worry. STAI-Anxiety scores increase in  
11 response to physical danger and psychological stress, making it highly appropriate  
12 for this study. The use of STAI in pregnancy studies is discussed by Hundley, et al  
13 and we will interpret the results accordingly.[20]

14  
15 The questionnaire will be administered prior to fFN testing (baseline) and 24-48  
16 hours after the test, to assess early reactions to the test and any acute anxiety  
17 prompted by the result of the test. We will also be able to assess any differences in  
18 those presented with a high risk or low risk result. Although it might be interesting to  
19 assess anxiety again in the latter stages of pregnancy, it is likely that, in this  
20 population, many pregnancies will not reach full term. Thus we believe our strategy of  
21 repeat questionnaire administration will allow measurement of longer term anxiety  
22 induced or alleviated by the test, whilst minimising bias due to preterm or term  
23 delivery itself or loss to follow up.

24  
25 Follow up interviews will be performed with a sub-group of participants (n=30) to  
26 enable deeper exploration of women's views regarding fFN testing, to gain insight  
27 into the rationale for responses given in the questionnaires. Interviews will be  
28 conducted following confirmation of pregnancy status. Acceptability of the prognostic

1 model will also be assessed with women and a group of clinicians. All interviews will  
2 be audio recorded with consent, and field notes taken to ensure an audit trail.

3

4 Decision Support

5 We will develop a decision support tool in accordance with the guidelines produced  
6 by the International Patient Decision Aid Standards (IPDAS) Collaboration.[21]  
7 Scoping of decisional requirements and how data should be presented was  
8 performed during focus group consultation as part of QUIDS Qualitative  
9 (Supplementary Material). A prototype decision support tool incorporating the initial  
10 prognostic model developed as part of the IPD-meta-analysis, will be tested with  
11 women and clinicians, as part of the acceptability studies described above. A final  
12 version will be updated with the validated (and, if necessary revised) prognostic  
13 model generated from the prospective cohort study. The multidisciplinary trial  
14 steering committee will oversee the development process, and decide how material  
15 is selected for inclusion.

16

## 17 **ETHICS AND DISSEMINATION**

### 18 **Trial Management And Oversight Arrangements**

19 Project Management Group

20 The trial will be coordinated by a Project Management Group (PMG), consisting of  
21 the grant holders (Chief Investigator and Co-applicants), the trial manager,  
22 representatives from the Study Office and CHaRT (the supporting CTU), plus service  
23 user representatives (PAG). The PMG will meet approximately every four months by  
24 teleconference or face to face.

25

26 The Trial Manager based in Edinburgh will oversee the study and will be accountable  
27 to the Chief Investigator. The Trial Manager supported by the trial administrator(s)  
28 will take responsibility for the day-to-day transaction of study activities. They will be  
29 supported by the CTU at CHaRT to provide expertise and guidance. The Trial

1 1 Manager will be responsible for checking the CRFs for completeness, plausibility and  
2 consistency. Any queries will be resolved by the Investigator or delegated member  
3 of the trial team.  
4

5 5 A Delegation Log will be prepared for each site, detailing the responsibilities of each  
6 member of staff working on the trial.  
7

8 8 Trial Steering Committee and Data Monitoring Committee

9 9 A combined Trial Steering Committee and Data Monitoring Committee (TSC/DMC)  
10 will oversee the conduct and progress of the trial. The terms of reference of the  
11 Committee will be developed separately. Members of the TSC/DMC will consist of  
12 experts and two patient representatives.  
13

#### 14 **Good Clinical Practice**

15 15 The study will be conducted in accordance with the principles of Good Clinical  
16 Practice (GCP). A favorable ethical opinion has been obtained from the appropriate  
17 REC (reference 16/WS/0068) and local R&D approval will be obtained prior to  
18 commencement of the study at each site.  
19

#### 20 **Dissemination**

21 21 On completion of the study, the study data will be analysed and tabulated, and a  
22 clinical study report will be prepared in accordance with GCP guidelines. Results will  
23 be communicated to the academic community via the scientific literature, attendance  
24 at conferences and invited presentations. Summaries of results will also be made  
25 available to investigators for dissemination within clinics. Social media will be used to  
26 signpost publications and conference presentations and highlight important findings.  
27 Twitter and Facebook will be used to disseminate findings to professional  
28 organizations, charities, stakeholders and the public. Communication to the general  
29 public will further be facilitated by our close links with charities such as Tommy's.[22]



1  
2  
3  
4 2 We anticipate that the decision support will be made available as web based  
5  
6 3 application that will be made freely available so clinicians can access it easily and it  
7  
8 4 can be readily translatable into UK practice. If it is found to be effective in ruling out  
9  
10 5 preterm delivery, it is likely that it will decrease unnecessary costly, and potentially  
11  
12 6 harmful treatments in women who have symptoms suggestive of preterm labour but  
13  
14 7 do not deliver early.

8

### 9 **PEER REVIEW**

10 The study was extensively peer reviewed as part of the process of gaining grant  
11 funding from the NIHR HTA (14/32/01).

12

### 13 **FUNDING**

14 This project was funded by the National Institute of Healthcare Research Health  
15 Technology and Assessment (Reference 14/32/01). The views expressed are those  
16 of the authors and not necessarily those of the NHS, the NIHR or the Department of  
17 Health.

18

### 19 **CONTRIBUTIONS TO AUTHORSHIP**

20 SJS, KB, RKM, JD, LJ, MC, AD, AK, AS, VHM, TL, KK, SHC, BM, RDR, JN and JEN  
21 developed the protocol. SJS, LW, RDR, KB, TL and JN drafted the protocol. RKM,  
22 JD, LJ, MC, AD, AK, AS, VHM, KK, SHC, BM and JEN reviewed and commented on  
23 the protocol.

24

### 25 **COMPETING INTERESTS**

26 SJS and JEN work at the University of Edinburgh, who received £1000 sponsorship  
27 from Hologic to support a meeting (The Society of Reproductive Investigation and

1 MRC Centre for Reproductive Health Scientific Symposium on Targeting  
2 Inflammation to Improve Reproductive Health across the Lifecourse – August 2017).  
3 AS has in the past (over last five years; not in the last three years) received funding  
4 for expenses related to advisory board and internal staff education from Hologic.  
5 MC received sponsorship from Hologic to organise an educational teaching focusing  
6 on prediction of Preterm Birth at the 2017 annual meeting of the British Maternal and  
7 Fetal Medicine Society.  
8 Hologic, the makers of fFN have provided analysers and technical support for their  
9 use to sites participating in the QUIDS prospective cohort study. They have no  
10 access to the data, or other involvement in the conduct, data analysis, interpretation  
11 of results or decision to publish the results of the study.

## 12 REFERENCES

- 13 1. Stock SJ, Wotherspoon L, Boyd K et al. Study Protocol: Quantitative Fibronectin to  
14 help Decision-making in women with Symptoms of Preterm Labour (QUIDS)  
15 Part One- Individual Patient Data Meta-analysis and Health Economic  
16 Analysis. *Submitted to BMJ Open alongside this manuscript(see*  
17 *supplementary information)*  
18
- 19 2. Honest H, Forbes CA, Duree KH, et al. Screening to prevent spontaneous preterm  
20 birth: systematic reviews of accuracy and effectiveness literature with  
21 economic modelling. *Health Technol Assess* 2009;13(43):1-627  
22
- 23 3. Deshpande SN, van Asselt AD, Tomini F, et al. Rapid fetal fibronectin testing to  
24 predict preterm birth in women with symptoms of premature labour: a  
25 systematic review and cost analysis. *Health Technol Assess* 2013;17(40):1-  
26 138  
27
- 28 4. Roberts D, Brown J, Medley N, Dalziel SR. Antenatal corticosteroids for  
29 accelerating fetal lung maturation for women at risk of preterm birth.  
30 *Cochrane Database Syst Rev* 2017;3:CD004454  
31  
32  
33  
34  
35  
36  
37  
38  
39  
40  
41  
42  
43  
44  
45  
46  
47  
48  
49  
50  
51  
52  
53  
54  
55  
56  
57  
58  
59  
60

- 1 5. Office for National Statistics (2013). ONS gestation-Specific Infant Mortality in  
2 England and Wales 2011. Cardiff ONS, 2013. Also available at:  
3 [https://www.ons.gov.uk/peoplepopulationandcommunity/healthandsocialcare/  
4 causesofdeath/bulletins/pregnancyandethnicfactorsinfluencingbirthsandinfant  
5 mortality/2013-10-10](https://www.ons.gov.uk/peoplepopulationandcommunity/healthandsocialcare/causesofdeath/bulletins/pregnancyandethnicfactorsinfluencingbirthsandinfantmortality/2013-10-10) (accessed 23<sup>rd</sup> November 2017).
- 6 6. Information Services Division (2013). "Births in Scottish hospitals 2012". Edinburgh  
7 National Services Scotland, 2013. Also available at:  
8 [http://www.isdscotland.org/Health-Topics/Maternity-and-  
9 Births/Publications/2013-08-27/2013-08-27-Births-Report.pdf?34511965514](http://www.isdscotland.org/Health-Topics/Maternity-and-Births/Publications/2013-08-27/2013-08-27-Births-Report.pdf?34511965514)  
10 (accessed 23<sup>rd</sup> November 2017).
- 11 7. Macintyre-Beon C, Skeoch C, Jackson L, Booth P, Cameron A. Scottish Perinatal  
12 Collaborative Transport Study. NHS Quality Improvement Scotland 2008
- 13 8. <http://www.weqas.com/services/poct-eqa/> (accessed 23<sup>rd</sup> November 2017).
- 14 9. Vergouwe Y, Steyerberg EW, Eijkemans MJ, Habbema JD. Substantial effective  
15 sample sizes were required for external validation studies of predictive logistic  
16 regression models. *J Clin Epidemiol* 2005;58(5):475-83
- 17 10. Vittinghoff E, McCulloch CE. Relaxing the rule of ten events per variable in  
18 logistic and Cox regression. *Am J Epidemiol* 2007;165(6):710-8
- 19 11. Abbott DH, Seed PT, Bennett PR et al. EQUIPP: Evaluation of Fetal Fibronectin  
20 with a novel bedside Quantitative Instrument for the Prediction of Preterm  
21 birth. *Arch Dis Child Fetal Neonatal Ed* 2014;99:A150-A51
- 22 12. van Baaren GJ, Vis JY, Wilms FF, et al. Predictive value of cervical length  
23 measurement and fibronectin testing in threatened preterm labor. *Obstet  
24 Gynecol* 2014;123(6):1185-92
- 25 13. DeFranco EA, Lewis DF, Odibo AO. Improving the screening accuracy for  
26 preterm labor: is the combination of fetal fibronectin and cervical length in  
27 symptomatic patients a useful predictor of preterm birth? A systematic review.  
28 *Am J Obstet Gynecol* 2013;208(3):233 e1-6

- 1 14. Ades AE, Sculpher M, Sutton A, et al. Bayesian methods for evidence synthesis  
2 in cost-effectiveness analysis. *Pharmacoeconomics* 2006;24(1):1-19  
3  
4 15. Sculpher MJ, Claxton K, Drummond M, McCabe C. Whither trial-based economic  
5 evaluation for health care decision making? *Health Econom* 2006;15(7):677-  
6 87  
7  
8 16. British National Formulary. BNF 73. 2017. .  
9  
10 17. Department of Health. Information Services Division. Scottish Health Service  
11 Costs Book 2012. 2012. Information Services Division.  
12  
13 18. National Institute for Health and Care Excellence. Guide to the Methods of  
14 Technology Appraisal: 2013. 2013 National Institute for Health and Clinical  
15 Excellence.  
16  
17 19. Briggs AH. Handling uncertainty in cost-effectiveness models.  
18 *Pharmacoeconomics* 2000;17(5):479-500  
19  
20 20. Hundley V, Gurney E, Graham W, Rennie AM. Can anxiety in pregnant women  
21 be measured using the State-Trait Anxiety Inventory. *Midwifery*  
22 1998;14(2):118-21  
23  
24 21. <http://ipdas.ohri.ca> (accessed 23rd November 2017)  
25  
26 22. <https://www.tommys.org> (accessed 23rd November 2017)  
27  
28  
29  
30  
31  
32  
33  
34  
35  
36  
37  
38

## 39 **Figure Legends**

### 40 **Figure 1**

41 Flow chart illustrating the design of QUIDS study and conceptual division into Part 1  
42 and Part 2  
43  
44  
45  
46  
47  
48  
49  
50  
51  
52  
53  
54  
55  
56  
57  
58  
59  
60

1  
2  
3  
4  
5  
6  
7  
8  
9  
10  
11  
12  
13  
14  
15  
16  
17  
18  
19  
20  
21  
22  
23  
24  
25  
26  
27  
28  
29  
30  
31  
32  
33  
34  
35  
36  
37  
38  
39  
40  
41  
42  
43  
44  
45  
46  
47  
48  
49  
50  
51  
52  
53  
54  
55  
56  
57  
58  
59  
60

Figure 1

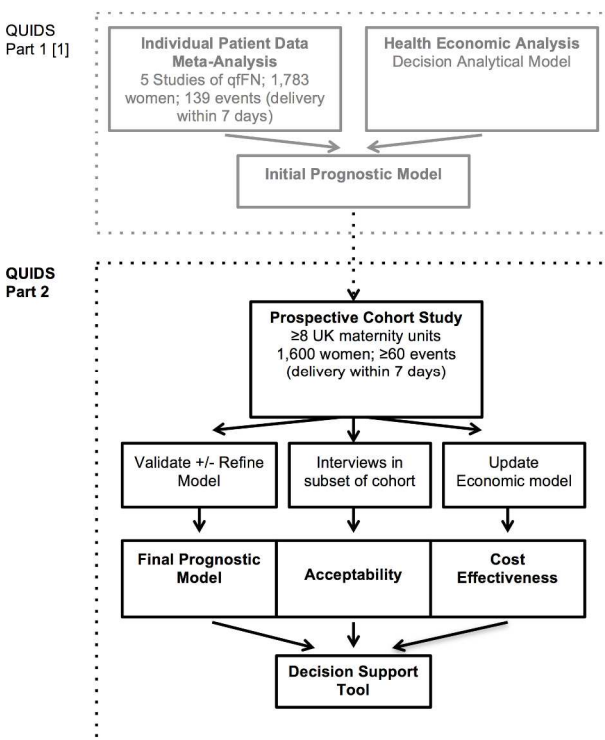

209x297mm (300 x 300 DPI)

1  
2  
3  
4  
5  
6  
7  
8  
9  
10  
11  
12  
13  
14  
15  
16  
17  
18  
19  
20  
21  
22  
23  
24  
25  
26  
27  
28  
29  
30  
31  
32  
33  
34  
35  
36  
37  
38  
39  
40  
41  
42  
43  
44  
45  
46  
47  
48  
49  
50  
51  
52  
53  
54  
55  
56  
57  
58  
59  
60

## QUIDS Qualitative

Quantitative Fibronectin to help Decision-making in women with Symptoms of Preterm Labour:  
determining decisional requirements

## Protocol

(October 2015)

White H, O'Brien E, Hodgetts-Moreton V, Stock S, Lavender T

## Background

Preterm birth, defined as birth prior to 37 weeks gestation, occurs in 6-7% of pregnancies in Europe<sup>1</sup> and was recorded as 5.78% in England in 2013/14, equating to over 37,000 births.<sup>2</sup> Preterm birth is associated with a high risk of mortality, wide-ranging short- and long-term morbidities,<sup>3,4</sup> and significant economic costs to the NHS compared with birth at term.<sup>5</sup> Reducing the detrimental impact of preterm birth relies on the provision of timely and appropriate perinatal interventions. However, accurate prediction of preterm birth is challenging, even when the clinical symptoms are suggestive of preterm labour. In randomised trials approximately 80% of women diagnosed with preterm labour remained pregnant after 7 days.<sup>6,7</sup>

Interventions in preterm labour and preparations for preterm birth may include administration of corticosteroids to accelerate fetal lung maturation<sup>8,9</sup> and magnesium sulphate for fetal neuroprotection,<sup>10</sup> in utero transfer to a facility with appropriate maternity and neonatal services, and tocolysis to optimise time before birth to enable these.<sup>11</sup> Whilst such interventions can improve outcomes for mothers and babies who do experience preterm birth, they are not necessarily benign, especially for those in whom preterm birth does not occur.

The maximal beneficial impact of corticosteroids occurs with administration between 48 hours and seven days before birth, thus timing is especially important in optimising benefit for the neonate. For women who remain at risk of preterm birth after seven days of the initial dose, repeated doses reduce respiratory distress in the neonate<sup>9</sup> but have been found to be associated with a dose-dependent reduction in birthweight.<sup>12,13</sup> A five-year follow-up study of women who received repeated doses of antenatal corticosteroids due to risk of preterm birth found an increased risk of neurodevelopment impairment in infants born at term.<sup>14</sup> Therefore developing a strategy to establish the optimal time to give steroids is a research priority.

1  
2  
3 Magnesium sulphate administration immediately prior to birth has been shown to reduce cerebral  
4 palsy,<sup>10</sup> but there is a risk of magnesium toxicity leading to respiratory depression in the mother and,  
5  
6 theoretically, the neonate.<sup>15</sup>  
7  
8  
9

10 Whilst there is no clear beneficial effect of tocolytics on the incidence or outcome of preterm birth,<sup>16</sup>  
11  
12 their use is recommended if the days gained prior to preterm birth can be used appropriately, for  
13  
14 example transfer to a suitable maternity unit or the administration of drugs to protect the  
15  
16 neonate.<sup>11</sup> Tocolysis is linked with various maternal and neonatal complications,<sup>17</sup> hence the need  
17  
18 for therapy targeted only for those at risk of preterm birth and close monitoring of the mother and  
19  
20 fetus throughout.  
21  
22  
23

24 Often, inpatient admission is recommended if preterm labour is suspected. Previous literature has  
25  
26 highlighted the social isolation and support needs that women with high-risk pregnancies who are  
27  
28 hospitalised experience.<sup>18</sup> In some cases, in-utero transfer is indicated to ensure that birth takes  
29  
30 place in a specialist unit with appropriate neonatal care facilities. This policy has been shown to  
31  
32 reduce mortality<sup>19,20</sup> and morbidity<sup>21</sup> in preterm neonates, especially those born very premature.  
33  
34 Qualitative research has indicated that women generally acknowledge the potential benefit of in  
35  
36 utero transfer to their baby and, hence, are willing to endure the inconvenience and upheaval that it  
37  
38 entails.<sup>22,23</sup> However, the experience is associated with an emotional, social and financial burden on  
39  
40 women and their families, especially for the substantial proportion of women who do not deliver  
41  
42 prematurely following in utero transfer. When describing their experiences of in utero transfer,  
43  
44 women expressed shock at the prospect of the transfer, feeling socially isolated, and having no  
45  
46 control over the situation, in addition to the practical difficulties experienced particularly by women  
47  
48 who already had children.<sup>22,24,25</sup> In a large survey of women who had experienced in utero transfer,  
49  
50 over a quarter lamented the financial cost<sup>24</sup> particularly with respect to their partner's outlay for  
51  
52 travel, food, accommodation, and phone bills, exacerbated with requiring time off work.<sup>22</sup>  
53  
54  
55  
56  
57

58 Furthermore, in utero transfer is costly to maternity services. Securing a maternal and neonatal bed  
59  
60



1  
2  
3 in another unit is a time-consuming task that often falls to delivery suite midwives to arrange, whilst  
4  
5 also continuing to provide care to the woman.<sup>26</sup> In a large observational study of all in utero  
6  
7 transfers that took place in Scotland in a six-month period, nearly one third of all transfers were due  
8  
9 to threatened preterm labour.<sup>27</sup> Under half of the women transferred from one consultant-led unit  
10  
11 to another gave birth within 48 hours.<sup>27</sup> Such unnecessary transfers are costly to women, their  
12  
13 families and maternity services. Qualitative research into women's experiences of preterm labour  
14  
15 have highlighted the need for caregivers to create an environment where women are enabled to  
16  
17 discuss their fears<sup>28</sup> and exert control over how they manage their preterm labour care.<sup>25</sup>  
18  
19  
20  
21  
22  
23  
24

25 Accurate prediction of preterm birth could reduce the burdens and risks associated with  
26  
27 unnecessary interventions, and enable women and their clinicians to make informed decisions  
28  
29 regarding their care. Numerous diagnostic tests have been used in preterm labour, including  
30  
31 biochemical tests of vaginal secretions and cervical length.<sup>29</sup> One such test is fetal fibronectin, a  
32  
33 near-bedside test that provides a positive or negative result and has excellent negative predictive  
34  
35 value.<sup>30</sup> Thus fetal fibronectin can identify which women will not benefit and may be put at risk by  
36  
37 the interventions described previously, and reduce costs to maternity services.<sup>31</sup> Developments in  
38  
39 fetal fibronectin testing have led to a quantitative test that provides a concentration of fetal  
40  
41 fibronectin in vaginal secretions, giving women and clinicians more information on which to base  
42  
43 their management decisions.<sup>32</sup>  
44  
45  
46  
47  
48  
49  
50

51 Qualitative evidence has indicated that women feel a sense of increased responsibility to their  
52  
53 babies and themselves during a high risk pregnancy, such as threatened preterm labour.<sup>33</sup> Women  
54  
55 want to be involved in decision making about their care to different degrees and feel most satisfied  
56  
57 when their caregiver supports them to make decisions in the way they felt most comfortable.<sup>33</sup>  
58  
59  
60

1  
2  
3 Previous literature on decision making and preterm birth has focussed on diagnostic tests<sup>6,28-32,34</sup> and  
4 the care of the preterm infant.<sup>35,36</sup> To date, there has been no investigation of what women, their  
5 partners and caregivers would like to know in order to make informed decisions about the care that  
6 is provided following the signs and symptoms of preterm labour.  
7  
8  
9  
10  
11  
12  
13  
14  
15

16 Funding has been received from the National Institute for Health Research Health Technology  
17 Assessment Programme for a large, multicentre trial to develop a mobile application decision  
18 support tool for the management of women with symptoms and signs of preterm labour, based on a  
19 validated model using quantitative fetal fibronectin testing. This study is the precursor to that trial,  
20 with the aim of determining the decisional needs of pregnant women with the symptoms and signs  
21 of preterm labour, their families and caregivers, using a qualitative framework approach. The  
22 outcomes of this qualitative study will inform the development of the mobile application decision  
23 support tool, using the findings from an individual patient data meta-analysis. The tool will then be  
24 externally validated and refined in the multi-centre trial, QUIDS.  
25  
26  
27  
28  
29  
30  
31  
32  
33  
34  
35  
36  
37  
38  
39  
40  
41  
42  
43  
44  
45  
46  
47  
48  
49  
50  
51  
52  
53  
54  
55  
56  
57  
58  
59  
60

## Methods

A qualitative framework approach will be used, based on data collected from focus groups and semi-structured telephone interviews.

## Setting

Focus groups will take place in three maternity units: Liverpool Women's NHS Foundation Trust, Birmingham Women's NHS Foundation Trust and Royal Edinburgh Hospital, NHS Lothian. There will be focus groups for women and a separate focus group for partners. Clinicians who care for women with threatened preterm birth will be interviewed by telephone.

## Sample

A purposive sample of women and partners will be recruited to cover a variety of experiences of preterm labour and birth. Women will be stratified by their prior experience and relevant characteristics, including ethnicity, previous obstetric history, living in an urban or rural setting and proximity to a tertiary neonatal referral centre. Two focus groups of 4–8 women will be conducted at each site; one for pregnant women who are at high risk of preterm birth, and one for postnatal women who have recently experienced preterm birth. One partners' focus group will be conducted at one of the sites. If women or partners are unable to attend a focus group but still wish to participate, a semi-structured telephone interview will be offered.

Up to 10 obstetricians, including trainees, midwives, and neonatologists will be purposefully recruited to cover a range of professional backgrounds and experience. Semi-structured telephone interviews will be used to collect the data.

## Eligibility

### *Principal inclusion criteria for women's antenatal focus groups*

Women who are currently pregnant who:

- Have previously experienced preterm birth following preterm labour,
- Have experienced threatened preterm labour in this pregnancy,
- Are at high risk of preterm birth for another clinical reason, such as prior cervical surgery.

### *Principal inclusion criteria for women's postnatal focus groups*

Women who have experienced preterm birth following preterm labour at <34 weeks whose babies **are stable and well** and are receiving care on the special care baby unit or neonatal intensive care unit.

### *Principal inclusion criteria for partners' focus groups*

Partners of women who fit the eligibility criteria for either focus group.

### *Principal exclusion criteria for the focus groups*

Non-English speaking individuals.

### *Principal inclusion criteria for clinician interviews*

Clinicians who care for pregnant women i.e. obstetricians (including trainees), neonatologists and midwives.

### *Principal exclusion criteria for clinician interviews*

1  
2  
3 Researchers in QUIDS or QUIDS qualitative.  
4  
5  
6  
7  
8

## 9 **Recruitment**

### 10 *Women and partners*

11  
12  
13  
14  
15 Eligible women will be identified by clinicians in the preterm birth clinic and other antenatal clinics,  
16  
17 and antenatal, triage or labour wards (for the antenatal focus groups) and the special care baby unit  
18  
19 or postnatal clinics (for the postnatal focus groups) at each site. Eligible partners will be identified by  
20  
21 the same method. Clinicians who are aware of and understand the research aims will approach  
22  
23 women and partners to request consent for a researcher to contact them. Importantly, only  
24  
25 postnatal parents whose babies are being cared for on the SCBU who are considered stable and well  
26  
27 by the clinicians will be approached. With consent the researcher will make contact to talk to the  
28  
29 women and/or their partners about the research, either face-to-face or over the telephone.  
30  
31

32  
33 Potential participants will be given the participant information sheet (PIS) (appendix \_) that is  
34  
35 relevant to them and given verbal information about the study. Each participant will be given time to  
36  
37 read the information and the opportunity to have any questions answered. Willing participants will  
38  
39 be asked to provide their written consent prior to the focus groups.  
40  
41  
42  
43  
44  
45

### 46 *Clinicians*

47  
48  
49 Eligible clinicians will be approached by the researchers, via email or face-to-face. Clinicians will be  
50  
51 given the clinician PIS (appendix \_) and the opportunity to read the information and have any  
52  
53 questions answered. Willing clinicians will be asked to provide their written consent prior to the  
54  
55 interviews.  
56  
57  
58  
59  
60

1  
2  
3 All participants (women, partners and clinicians) will be reassured that they are not compelled to  
4 participate, that they can withdraw from the study at any time, and that non-participation will not  
5 affect their care or employment in any way.  
6  
7  
8  
9

### 10 11 12 13 **Data collection**

14  
15  
16 The primary aim of this research is to determine the decisional requirements of women, their  
17 partners and clinicians for the management of preterm labour. Qualitative semi-structured  
18 interviews, in a focus-group setting or individual telephone interviews, provide a means of collecting  
19 rich, in-depth data with a specific focus.<sup>37</sup> Hence, structured topic guides will be used to initiate and  
20 concentrate the discussion (appendices 7–10).  
21  
22  
23  
24  
25  
26  
27

28  
29 Focus groups are the preferred format for eliciting the view of women and women's partners.

30  
31 Encouraging discussion among a homogenous group with a shared interest is likely to provide rich  
32 insight and understanding into the group's experiences, beliefs and norms as a result of their social  
33 interaction.<sup>38</sup> Conversely, interviewing clinicians individually avoids the potential pitfall of  
34 professional embarrassment stifling ideas in a group setting. Interviewing individual clinicians with a  
35 range of professional experience should ensure that the decisional requirements of clinicians at all  
36 levels of experience are understood.  
37  
38  
39  
40  
41  
42  
43  
44  
45  
46  
47

48  
49 Demographic details and baseline characteristics will be collected prior to the interviews, either as a  
50 self-completion questionnaire, or questions asked by the researcher over the telephone. All  
51 interviews will be audio recorded, with the participants' consent, and field notes taken. The focus  
52 groups will be facilitated by at least two researchers. This is to ensure that all pre-specified areas of  
53 interest are covered and that non-verbal communication and group interactions are documented  
54 within the field-notes, which will provide context for the data analysis. Recapping will be used to  
55  
56  
57  
58  
59  
60

V 1.3  
21/10/15

clarify aspects and avoid misinterpretation. To enable all participants to talk freely, the researchers will be unknown to the participants and not working clinically in the unit where the interview is conducted. Clinicians will be interviewed by a researcher who is unknown to them.

|                                  | Site       | Interviewers |
|----------------------------------|------------|--------------|
| Women and partners' focus groups | Liverpool  | HW and EO    |
|                                  | Birmingham | HW and VH-M  |
|                                  | Edinburgh  | HW and LM    |
| Clinician interviews             | Telephone  | HW (and EO?) |

### Analysis plan

A framework approach to data analysis will be used. This approach was developed to manage and interpret large volumes of data collected to inform health policy, meaning they had focussed aims and objectives.<sup>37</sup> Likewise, this research has clear aims, as described previously, in addition to the methodological aim of collecting rich data about the experiences and beliefs of women, their partners and clinicians in relation to managing preterm labour.

Framework analysis follows specific, clearly documented stages of analysis that are transparent so that others can review the interpretation processes and understand how the findings were reached.<sup>39</sup> Transparency is particularly important in this study as the findings will inform the development of an application to aid management decisions in clinical practice. Following verbatim transcription of the interview recordings, the researchers will become familiar with the data by reading the transcripts and field-notes several times. The next stage is to develop a theoretical framework by re-reading the transcripts and making notes as recurring characteristics are

1  
2  
3 recognised. The characteristics will then be collated into themes, which are based on the text itself,  
4 supported by the field-notes. The resulting thematic framework will be applied back to the  
5 transcripts and field-notes to check that it reflects the context of the original data. The transcripts  
6 will be coded, so that portions of text are linked to a discrete theme. A sample of transcripts will be  
7 independently coded by two people. The data will be charted and indexed to identify the preterm  
8 labour or professional experience of the participant, thus enabling the attribution of themes to a  
9 particular group. Finally, the content of the charts will be interpreted and mapped against each  
10 other to devise themes and sub-themes categories. Once again, this will involve review of the  
11 original data. Explanatory accounts will be developed to clarify the data and quotable sections of  
12 data will be identified. The final categories will be discussed between the researchers until  
13 consensus is met. The researchers will maintain reflexive journals throughout the data collection and  
14 analysis stages, recognising and ameliorating, as far as possible, the fact that their presence and  
15 assumptions impact on the data and the findings.<sup>40</sup>

16  
17 This method of data analysis creates a clear audit trail thus ensuring rigour. Each stage of analysis  
18 refers back to the original data so that context and meaning is not lost in the final framework of  
19 themes and subthemes. The data analysis process will be managed using NVivo software, a  
20 qualitative data analysis tool.

### 21 22 23 24 25 26 27 28 29 30 31 32 33 34 35 36 37 38 39 40 41 42 43 44 45 46 **Participant withdrawal**

47  
48  
49 Participants may withdraw from the study at any point. However, they will not be able to withdraw  
50 use of their data once the prognostic tool is developed.  
51  
52  
53  
54  
55  
56  
57  
58  
59  
60



## Safety

The physical safety of participants will be ensured through adhering to the health and safety policies of the host units where the focus groups take place.

The emotional wellbeing of the participants will be safeguarded by following the Distress Policy (see appendix 11). The Supervisors of Midwives (SOM) team in each unit will be informed of the study and women and their partners will be given the SOM team contact details, should they become distressed or upset as a result of talking about their experiences. Participants will also be given the contact details for accessing local counselling services.

## Good clinical practice

### *Informed consent*

All participants will be fully informed about the study and the subsequent QUIDS trial via verbal and written communication. All eligible individuals will be given the participant information sheet (appendix \_\_) and provided with an opportunity to have any questions answered. Written consent will then be gained prior to the commencement of the focus groups/interviews.

### *Confidentiality*

Demographic information will be collected from participants to attribute themes from the data to particular groups within the analysis and dissemination of findings. Demographic information, which will contain potentially identifiable information, will be kept in a secure lockable cabinet. Audio recordings will be stored on an encryptable audio device only until they are transcribed. Once transcribed the audio recordings will be deleted. Transcription services are provided by '1<sup>st</sup> Class Secretarial', who subscribe to the Data Protection Act and have also signed the Code of Practice on Data Handling. Hard copies of audio transcripts and field-notes will be kept in a separate secure

1  
2  
3 lockable cabinet to the demographic information. The transcripts and field-notes will be coded to  
4  
5 identify which participant provided that data; the codes will only be known by the researchers.  
6

7  
8 Participant's data will not be used for any purpose other than this study and the subsequent QUIDS  
9  
10 trial.  
11

### 12 13 *Data Protection*

14  
15  
16 Participants will be informed that publications from this study will contain direct quotes from the  
17  
18 focus groups/interviews and categorisation of their experience of preterm labour (e.g. experienced  
19  
20 preterm birth), which could enable personal identification.  
21

22  
23 All researchers involved in this study must comply with the requirements of the Data Protection Act  
24  
25 1998 with regard to the collection, storage, processing and disclosure of personal information and  
26  
27 uphold the Act's core principles. All computers used for processing data are password protected and  
28  
29 subject to the strict data protection policies of the researcher's institution.  
30  
31

### 32 33 *Good clinical practice training*

34  
35  
36 All researchers involved in this study must hold evidence of recent Good Clinical Practice training.  
37  
38  
39  
40  
41

## 42 **Additional ethical considerations**

### 43 44 *Expenses and reimbursement*

45  
46  
47 Participants will be reimbursed for all out of pocket expenses, for example travelling to the interview  
48  
49 site. Participants will be informed of this and how to apply for expenses reimbursement, including  
50  
51 keeping receipts for travel.  
52  
53  
54  
55  
56  
57  
58  
59  
60

### *Safety of researchers*

An individualised risk assessment will be conducted to identify any risks to researchers or participants involved in this study. The lone working policy of the institution will be adhered to at all times. The only anticipated lone working will be during travel to and from the interview sites.

The lone working policy of the researcher's institutions mandates that researchers wear a GPS tracking and audio transmitting device during all lone-working, off-site research activity with participants. Participants will be informed if this device is being used.

### **Insurance / Indemnity**

The researcher's institution holds public liability insurance and professional indemnity insurance (appendices 12, 13 and 14).

### **Timeline**

The anticipated start date for the focus groups and interviews is 1<sup>st</sup> January 2016, to be completed within 3 months.

1  
2  
3 **Appendices**  
4  
5

6 **Appendix 1: PIS women**  
7

8  
9 **Appendix 2: PIS partners**  
10

11  
12 **Appendix 3: PIS clinicians**  
13

14  
15 **Appendix 4: Consent form women**  
16

17  
18 **Appendix 5: consent form partners**  
19

20  
21 **Appendix 6: consent form clinicians**  
22

23  
24 **Appendix 7: Interview schedule AN women**  
25

26  
27 **Appendix 8: Interview schedule PN women**  
28

29  
30 **Appendix 9: Interview schedule partners**  
31

32  
33 **Appendix 10: Interview schedule clinicians**  
34  
35  
36  
37  
38  
39  
40  
41  
42  
43  
44  
45  
46  
47  
48  
49  
50  
51  
52  
53  
54  
55  
56  
57  
58  
59  
60

## Appendix 11: Distress policy

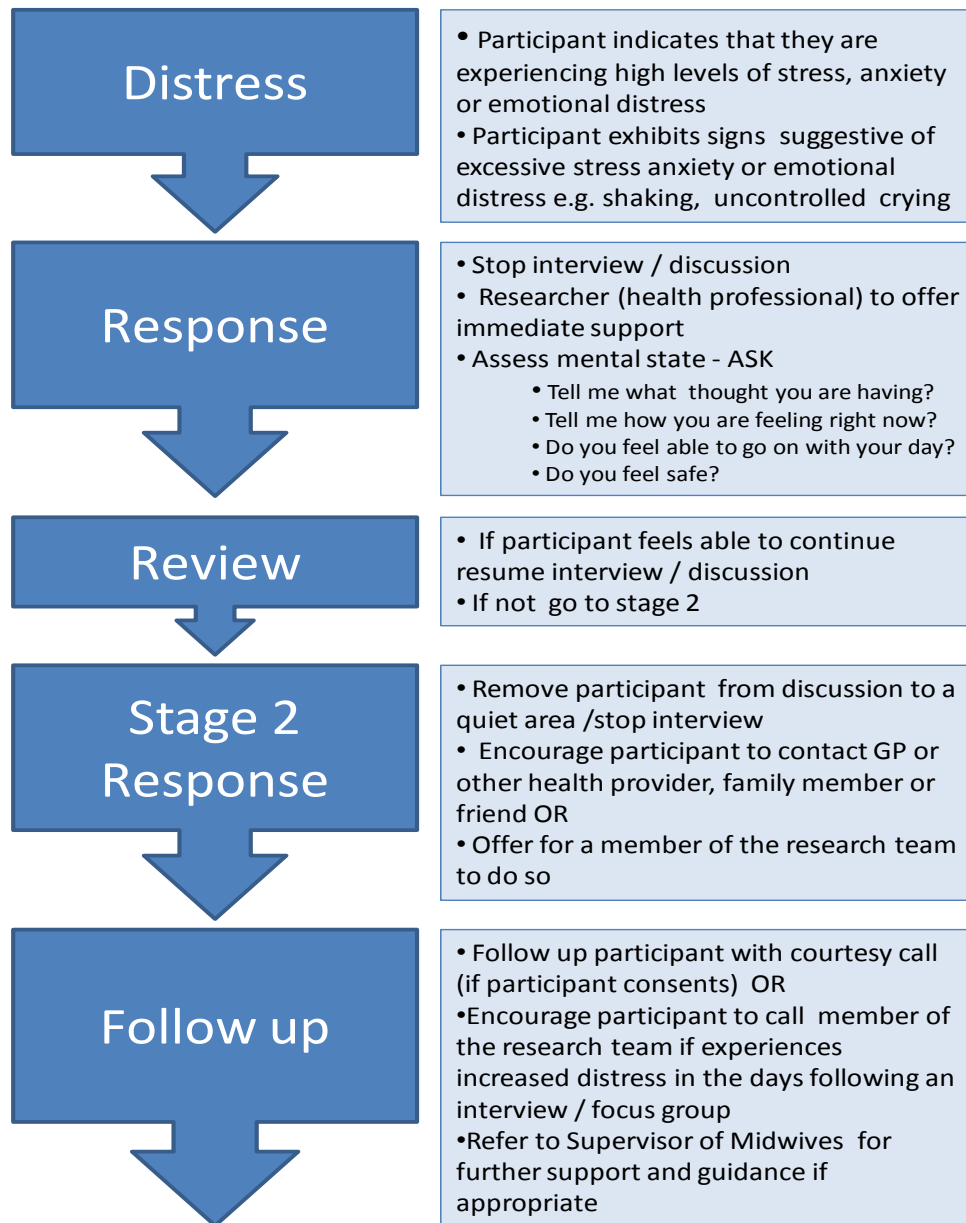

Adapted from Haigh and Witham (2010)<sup>41</sup>

1  
2  
3 **Appendix 12: Public Liability insurance**  
4  
5  
6  
7  
8  
9  
10  
11  
12  
13  
14  
15  
16  
17  
18  
19  
20  
21  
22  
23  
24  
25  
26  
27  
28  
29  
30  
31  
32  
33  
34  
35  
36  
37  
38  
39  
40  
41  
42  
43  
44  
45  
46  
47  
48  
49  
50  
51  
52  
53  
54  
55  
56  
57  
58  
59  
60

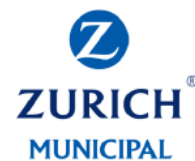

To Whom It May Concern

Our ref: SP/IND

3 June, 2015

Zurich Municipal Customer: The University of Manchester

This is to confirm that The University of Manchester have in force with this Company Public Liability Insurance until the policy expiry on 31 May 2016:

**Policy Number:** NHE-07CA03-0013

**Limit of Indemnity:** £ 50,000,000 any one claim

**Excess:** Nil any one claim

Zurich Municipal  
Zurich House  
2 Gladiator Way  
Farnborough  
Hampshire  
GU14 6GB

Telephone 0870 2418050  
Direct Phone 01252 387859  
Direct Fax 01252 375893  
E-mail [alison.cliff@uk.zurich.com](mailto:alison.cliff@uk.zurich.com)

Communications will be monitored regularly to improve our service and for security and regulatory purposes

Zurich Municipal is a trading name of Zurich Insurance Group Ltd

A public limited company incorporated in Ireland. Registration No. 13460  
Registered Office: Zurich House, Ballsbridge Park, Dublin 4, Ireland.

UK branch registered in England and Wales  
Registration No. BR7985.  
UK Branch Head Office: The Zurich Centre,  
3000 Parkway, Whiteley, Fareham, Hampshire  
PO15 7JZ

Authorised by the Central Bank of Ireland and subject to limited regulation by the Financial Conduct Authority. Details about the extent of our regulation by the Financial Conduct Authority are available from us on request.

Yours faithfully

A handwritten signature in black ink, appearing to read 'Nigel Smith'.

Underwriting Services  
Zurich Municipal  
Farnborough

## Appendix 13: Employers' Liability insurance

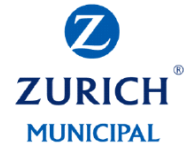

### Certificate of Employers' Liability Insurance(a)

(Where required by regulation 5 of the Employers' Liability (Compulsory Insurance) Regulations 2008 (the Regulations), a copy of this certificate must be displayed at all places where you employ persons covered by the policy or an electronic copy of the certificate must be retained and be reasonably accessible to each employee to whom it relates).

|                                             |                              |
|---------------------------------------------|------------------------------|
| Policy No.                                  | NHE-07CA03-0013              |
| 1. Name of policyholder                     | The University of Manchester |
| 2. Date of commencement of insurance policy | 01 June 2015                 |
| 3. Date of expiry of insurance policy       | 31 May 2016                  |

We hereby certify that subject to paragraph 2:

- The policy to which this certificate relates satisfies the requirements of the relevant law applicable in Great Britain, Northern Ireland, the Isle of Man, the Island of Jersey, the Island of Guernsey and the Island of Alderney (b)
- (a) the minimum amount of cover provided by this policy is no less than £5 million (c)

Signed on behalf of Zurich Insurance plc (Authorised Insurer).

Signature

Stephen Lewis

Chief Executive Officer, Zurich Insurance plc (UK Branch)

Zurich Municipal is a trading name of Zurich Insurance plc  
A public limited company incorporated in Ireland  
Registration No. 13460 Registered Office Zurich House, Ballsbridge Park, Dublin 4 Ireland.  
UK branch registered in England and Wales Registration No. BR 7985  
UK Branch Head Office The Zurich Centre, 3000 Parkway, Whiteley, Fareham, Hampshire PO15 7TZ

### Notes

- Where the employer is a company to which regulation 3(2) of the Regulations applies, the certificate shall state in a prominent place, either that the policy covers the holding company and all its subsidiaries, or that the policy covers the holding company and all its subsidiaries except any specifically excluded by name, or that the policy covers the holding company and only the named subsidiaries.
- Specify applicable law as provided for in regulation 4(6) of the Regulations.
- See regulation 3(1) of the Regulations and delete whichever of paragraphs 2(a) or 2(b) does not apply. Where 2(b) is applicable, specify the amount of cover provided by the relevant policy

Authorised by the Central Bank of Ireland and subject to limited regulation by the Financial Conduct Authority. Details about the extent of our regulation by the Financial Conduct Authority are available from us on request

1  
2  
3 **Appendix 14: Professional indemnity insurance**  
4  
5  
6  
7

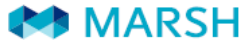

Cliffe Crowther  
Marsh Ltd  
Belvedere  
12 Booth Street  
Manchester  
M2 4AW  
+44 (0) 161 954 7317  
Fax +44 (0) 161 954 7210  
Cliffe.crowther@marsh.com  
www.marsh.com

11  
12  
13  
14  
15  
16 **To whom it may concern**  
17  
18  
19  
20  
21

22 29<sup>th</sup> May 2015  
23  
24  
25

26 Dear Sirs,

27 **CONFIRMATION OF INSURANCE – The University of Manchester and Subsidiary**  
28 **Companies**

29 As requested by the above client, we are writing to confirm that we act as Insurance Brokers to  
30 the client and that we have arranged insurance(s) on its behalf as detailed below:  
31

32 **PROFESSIONAL INDEMNITY INSURANCE**  
33

|                     |                                                                                                    |
|---------------------|----------------------------------------------------------------------------------------------------|
| INSURERS            | Novae Underwriting Ltd.                                                                            |
| POLICY NUMBER       | 003210MMA15C                                                                                       |
| PERIOD OF INSURANCE | 01 June 2015 to 31 <sup>st</sup> May 2016, both dates inclusive.                                   |
| LIMIT OF INDEMNITY  | GBP10,000,000 any one claim and in the aggregate any one insurance period plus costs and expenses. |
| DEDUCTIBLE          | GBP20,000 each & every claim including costs and expenses                                          |

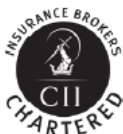

Registered in England Number: 1507274, Registered Office:  
1 Tower Place West, Tower Place, London EC3R 5BU.  
Marsh Ltd is authorised and regulated by the Financial Conduct  
Authority

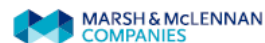

V 1.3  
21/10/15



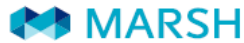

Page 2  
29<sup>th</sup> of May 2015

We have placed the insurance which is the subject of this letter after consultation with the client and based upon the client's instructions only. Terms of coverage, including limits and deductibles, are based upon information furnished to us by the client, which information we have not independently verified.

This letter is issued as a matter of information only and confers no right upon you other than those provided by the policy. This letter does not amend, extend or alter the coverage afforded by the policies described herein. Notwithstanding any requirement, term or condition of any contract or other document with respect to which this letter may be issued or pertain, the insurance afforded by the policy (policies) described herein is subject to all terms, conditions, limitations, exclusions and cancellation provisions and may also be subject to warranties. Limits shown may have been reduced by paid claims.

We express no view and assume no liability with respect to the solvency or future ability to pay of any of the insurance companies which have issued the insurance(s).

We assume no obligation to advise yourselves of any developments regarding the insurance(s) subsequent to the date hereof. This letter is given on the condition that you forever waive any liability against us based upon the placement of the insurance(s) and/or the statements made herein with the exception only of wilful default, recklessness or fraud.

This letter may not be reproduced by you or used for any other purpose without our prior written consent.

This letter shall be governed by and shall be construed in accordance with English law.

Yours faithfully

Cliffe Crowther

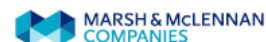

## References

1. Beck S, Wojdyla D, Say L, *et al*. The worldwide incidence of preterm birth: a systematic review of maternal mortality and morbidity. *Bull World Health Organ* 2010;88:31–38. doi:10.2471/BLT.08.062554.
2. Health and Social Care Information Centre. *Hospital Episode Statistics: NHS Maternity statistics — England, 2013–14*. Leeds, HSIC.
3. Saigal S, Doyle LW. An overview of mortality and sequelae of preterm birth from infancy to adulthood. *Lancet* 2008;371:261–9.
4. D’Onofrio BM, Class QA, Rickert ME, *et al*. Preterm birth and mortality and morbidity: a population-based quasi-experimental study. *JAMA Psychiatry* 2013; 70(11):1231-1240. doi:10.1001/jamapsychiatry.2013.2107 .
5. Mangham LJ, Petrou S, Doyle LW, *et al*. The cost of preterm birth throughout childhood in England and Wales. *Pediatrics* 2009;123(2):e312–27. doi: 10.1542/peds.2008-1827.
6. Alfirevic Z, Allen-Coward H, Molina F, *et al*. Targeted therapy for threatened preterm labor based on sonographic measurement of the cervical length: a randomized controlled trial. *Ultrasound Obstet Gynecol* 2007;29:47–50. DOI: 10.1002/uog.3908.
7. Salim R, Garmi G, Nachum Z, *et al*. Nifedipine compared with atosiban for treating preterm labor: a randomized controlled trial. *Obstet Gynecol* 2012;120:1323–31. DOI:10.1097/AOG.0b013e3182755dff
8. Roberts D, Dalziel SR. Antenatal corticosteroids for accelerating fetal lung maturation for women at risk of preterm birth. *Cochrane Database of Systematic Reviews* 2006, Issue 3. Art. No.: CD004454. DOI: 10.1002/14651858.CD004454.pub2.
9. Crowther CA, McKinlay CJD, Middleton P, Harding JE. Repeat doses of prenatal corticosteroids for women at risk of preterm birth for improving neonatal health outcomes.

- 1  
2  
3 *Cochrane Database of Systematic Reviews* 2015, Issue 7. Art. No.: CD003935. DOI:  
4  
5 10.1002/14651858.CD003935.pub4.  
6  
7  
8 10. Doyle LW, Crowther CA, Middleton P, Marret S, Rouse D. Magnesium sulphate for women at  
9  
10 risk of preterm birth for neuroprotection of the fetus. *Cochrane Database of Systematic*  
11  
12 *Reviews* 2009, Issue 1. Art. No.: CD004661. DOI:10.1002/14651858.CD004661.pub3.  
13  
14 11. Royal College of Obstetricians and Gynaecologists. *Tocolysis for women in preterm labour:*  
15  
16 *Green-top Guideline No. 1b*. 2011. London: RCOG.  
17  
18 12. Murphy KE, Hannah ME, Willan AR, Hewson SA, Ohlsson A, Kelly EN, Matthews SG, Saigal S,  
19  
20 Asztalos E, Ross S, Delisle M-F, Amankwah K, Guselle P, Gafni A, Lee SK, Armson BA, for the  
21  
22 MACS Collaborative Group. Multiple courses of antenatal corticosteroids for preterm birth  
23  
24 (MACS): a randomised controlled trial. *Lancet* 2008; 372: 2143–51.  
25  
26  
27 13. Norberg H, Stålnacke J, Diaz Heijtz R, Smedler A-C, Nyman M, Forssberg H, Norman M.  
28  
29 Antenatal corticosteroids for preterm birth: dose-dependent reduction in birthweight,  
30  
31 length and head circumference. *Acta Paediatrica* 2011;100:364–9.  
32  
33  
34 14. Asztalos E, Willan A, Murphy K, Matthews S, Ohlsson A, Saigal S, Armson A, Kelly E, Delisle  
35  
36 M-F, Gafni A, Lee S, Sananes R, Rovet J, Guselle P, Amankwah K, for the MACS-5  
37  
38 Collaborative Group. Association between gestational age at birth, antenatal  
39  
40 corticosteroids, and outcomes at 5 years: multiple courses of antenatal corticosteroids for  
41  
42 preterm birth study at 5 years of age (MACS-5). *BMC Pregnancy and Childbirth* 2014; 14:272.  
43  
44  
45 15. Jacquemyn Y, Zecic A, Van Laere D, Roelens K. The use of intravenous magnesium in non-  
46  
47 preeclamptic pregnant women: fetal/neonatal neuroprotection. *Arch Gynecol Obstet*  
48  
49 2015;291:969–975.  
50  
51  
52 16. Gyetvai K, Hannah ME, Ellen D, Hodnett ED, Ohlsson A. Tocolytics for preterm labour: a  
53  
54 systematic review. *Obstetrics and Gynecology* 1999;94(5):869–77.  
55  
56  
57 17. Hill WC. Risks and complications of tocolysis. *Clinical Obstetrics and Gynecology*  
58  
59 1995;38(4):725–45.  
60

- 1  
2  
3 18. Kent RA, Yazbek M, Heyns T, et al. The support needs of high-risk antenatal patients in  
4 prolonged hospitalisation. *Midwifery* 2015;31:164–9.  
5  
6  
7  
8 19. Lasswell SM, Barfield WD, Rochat RW, Blackmon L. Perinatal Regionalization for Very Low-  
9 Birth-Weight and Very Preterm Infants: A Meta-analysis. *JAMA*. 2010;304(9):992-1000.  
10 doi:10.1001/jama.2010.1226.  
11  
12  
13  
14 20. Marlow N, Bennett C, Drasper ES, Hennessy EM, Morgan AS, Costeloe KL. Perinatal  
15 outcomes for extremely preterm babies in relation to place of birth in England: The EPICure  
16 2 study. *Arch Dis Child Fetal Neonatal Ed* 2014;99:F181–88.  
17  
18  
19  
20 21. Towers TV, Bonebrake R, Padilla G, Rumney P. The effect of transport on the rate of severe  
21 intraventricular hemorrhage in very low birth weight infants. *Obstetrics and Gynecology*  
22 2000;95(2):291–295.  
23  
24  
25  
26 22. Porcellato L, Masson G, O’Mahony F, Jenkinson S, Vanner T, Cheshire K, Perkins E. ‘It’s  
27 something you have to put up with’— service users’ experiences of in utero transfer: a  
28 qualitative study. *BJOG* 2015; DOI: 10.1111/1471-0528.13235.  
29  
30  
31  
32 23. Bond PA, Crisp AS, Morgan MEI, Lobb MO, Cooke RWI. Maternal attitudes to transfer before  
33 delivery. *Journal of Reproductive and Infant Psychology* 1984;2(1):33–41. DOI:  
34 10.1080/02646838408403447.  
35  
36  
37  
38 24. Wilson AM, MacLean D, Skeoch CH, Jackson L. An evaluation of the financial and emotional  
39 impact of *in utero* transfers upon families: a Scotland-wide audit. *Infant* 2010;6(2):38–40.  
40  
41  
42  
43 25. Coster-Schulz MA, Mackey MC. The preterm labour experience: a balancing act. *Clinical*  
44 *Nursing Research* 1998;335–59.  
45  
46  
47  
48 26. Gale C, Hay A, Phillip C, et al. In-utero transfer is too difficult: results from a prospective  
49 study. *Early Human Development* 2012;88:147–50.  
50  
51  
52  
53 27. Macintyre-Beon C, Skeoch C, Jackson J, Booth P, Cameron A. *Perinatal Collaborative*  
54 *Transport Study: Final report*. 2008. Glasgow: Scottish Neonatal Transport Service.  
55  
56  
57  
58  
59  
60

- 1  
2  
3 28. O'Brien ET, Quenby S, Lavender T. Women's view of high risk pregnancy under threat of  
4 preterm birth. *Sexual and Reproductive Health* 2010;1:79–84.  
5  
6  
7  
8 29. Hezelgrave NL, Shennan AH, David AL. Tests to predict imminent delivery in threatened  
9 preterm labour. *BMJ* 2015;350:h2183 doi: 10.1136/bmj.h2183.  
10  
11  
12 30. Chandiramani M, Di Renzo GC, Gottschalk E, Helmer H, Henrich W, Hoesli I, Mol B, Norman  
13 JE, Robson S, Thornton S, Shennan A. Fetal fibronectin as a predictor of spontaneous  
14 preterm birth: a European perspective. *The Journal of Maternal-Fetal & Neonatal Medicine*  
15 2011;24(2):330–336.  
16  
17  
18 31. Deshpande SN, van Asselt ADI, Tomini F, Armstrong N, Allen A, Noake C, et al. Rapid fetal  
19 fibronectin testing to predict preterm birth in women with symptoms of premature labour: a  
20 systematic review and cost analysis. *Health Technol Assess* 2013;17(40).  
21  
22  
23 32. Radford S, Abbott D, Seed P, Kemp J, Shennan. Quantitative fetal fibronectin for the  
24 prediction of preterm birth in symptomatic women. *Arch Dis Child Fetal Neonatal Ed*  
25 2012;97(Suppl 1):A1–A125.  
26  
27  
28 33. Harrison MJ, Kushner KE, Benzies K, et al. Women's satisfaction with their involvement in  
29 health care decisions during a high-risk pregnancy. *Birth* 2003;30(2):109–15.  
30  
31  
32 34. Hill JL, Campbell MK, Zou GY, et al. Prediction of preterm birth in symptomatic women using  
33 decision tree modelling for biomarkers. *Am J Obstet Gynecol* 2008;198:468.e1-468.e9.  
34  
35  
36 35. Gallagher K, Martin J, Keller M, et al. European variation in decision-making and parental  
37 involvement during preterm birth. *Arch Dis Child Fetal Neonatal Ed* 2014;99:F245–9.  
38  
39  
40 36. Peerzada JM, Schollin J, Håkansson S. Delivery room decision-making for extremely preterm  
41 infants in Sweden. *Pediatrics* 2006;117(6):1988–95.  
42  
43  
44 37. Smith J, Firth J. Qualitative data analysis: the framework approach. *Nurse Researcher*  
45 2011;18(2):52–62.  
46  
47  
48 38. Rabiee F. Focus group interview and data analysis. *Proceedings of the Nutrition Society*  
49 2004;63: 655–660.  
50  
51  
52  
53  
54  
55  
56  
57  
58  
59  
60

- 1  
2  
3 39. Furber C. Framework analysis: a method for analysing qualitative data. *African Journal of*  
4  
5 *Midwifery and Women's Health* 2010;4(2):97–100.  
6  
7  
8 40. Sword W. Accounting for presence of self: reflections on doing qualitative research.  
9  
10 *Qualitative Health Research* 1999;9(2):270–8.  
11  
12 41. Haigh C, Witham G. *Distress protocol for qualitative data collection*. 2015. [Online] available  
13  
14 at:  
15  
16 [http://www2.mmu.ac.uk/media/mmuacuk/content/documents/rke/Advisory%20Distress%20](http://www2.mmu.ac.uk/media/mmuacuk/content/documents/rke/Advisory%20Distress%20Protocol.pdf)  
17  
18 [Protocol.pdf](http://www2.mmu.ac.uk/media/mmuacuk/content/documents/rke/Advisory%20Distress%20Protocol.pdf) accessed October 2015.  
19  
20  
21  
22  
23  
24  
25  
26  
27  
28  
29  
30  
31  
32  
33  
34  
35  
36  
37  
38  
39  
40  
41  
42  
43  
44  
45  
46  
47  
48  
49  
50  
51  
52  
53  
54  
55  
56  
57  
58  
59  
60

# BMJ Open

## Study Protocol: Quantitative Fibronectin to help Decision-making in women with Symptoms of Preterm Labour (QUIDS) Part Two- UK Prospective Cohort Study

|                                 |                                                                                                                                                                                                                                                                                                                                                                                                                                                                                                                                                                                                                                                                                                                                                                                                                                                                                                                                                                                                                                                                                                                                                                                                                                                                                                                                                                                                                                                                                                                                                                                                                                                                               |
|---------------------------------|-------------------------------------------------------------------------------------------------------------------------------------------------------------------------------------------------------------------------------------------------------------------------------------------------------------------------------------------------------------------------------------------------------------------------------------------------------------------------------------------------------------------------------------------------------------------------------------------------------------------------------------------------------------------------------------------------------------------------------------------------------------------------------------------------------------------------------------------------------------------------------------------------------------------------------------------------------------------------------------------------------------------------------------------------------------------------------------------------------------------------------------------------------------------------------------------------------------------------------------------------------------------------------------------------------------------------------------------------------------------------------------------------------------------------------------------------------------------------------------------------------------------------------------------------------------------------------------------------------------------------------------------------------------------------------|
| Journal:                        | <i>BMJ Open</i>                                                                                                                                                                                                                                                                                                                                                                                                                                                                                                                                                                                                                                                                                                                                                                                                                                                                                                                                                                                                                                                                                                                                                                                                                                                                                                                                                                                                                                                                                                                                                                                                                                                               |
| Manuscript ID                   | bmjopen-2017-020795.R2                                                                                                                                                                                                                                                                                                                                                                                                                                                                                                                                                                                                                                                                                                                                                                                                                                                                                                                                                                                                                                                                                                                                                                                                                                                                                                                                                                                                                                                                                                                                                                                                                                                        |
| Article Type:                   | Protocol                                                                                                                                                                                                                                                                                                                                                                                                                                                                                                                                                                                                                                                                                                                                                                                                                                                                                                                                                                                                                                                                                                                                                                                                                                                                                                                                                                                                                                                                                                                                                                                                                                                                      |
| Date Submitted by the Author:   | 27-Feb-2018                                                                                                                                                                                                                                                                                                                                                                                                                                                                                                                                                                                                                                                                                                                                                                                                                                                                                                                                                                                                                                                                                                                                                                                                                                                                                                                                                                                                                                                                                                                                                                                                                                                                   |
| Complete List of Authors:       | <p>Stock, Sarah; University of Edinburgh MRC Centre for Reproductive Health, Tommy's Centre for Maternal and Fetal Health; University of Western Australia School of Women's and Infant's Health,</p> <p>Wotherspoon, Lisa; University of Edinburgh MRC Centre for Reproductive Health, Tommy's Centre for Maternal and Fetal Health</p> <p>Boyd, Kathleen; University of Glasgow, Health Economics &amp; Health Technology Assessment</p> <p>Morris, R. K.; Univ Birmingham, School of Clinical and Experimental Medicine</p> <p>Dorling, Jon; Queen's Medical Centre, Neonatal Unit</p> <p>Jackson, Lesley; Royal Hospital for Children Glasgow, Neonatal Unit</p> <p>Chandiramani, Manju; Imperial College Healthcare NHS Trust, Queen Charlotte and Chelsea Hospital, Du Cane Road, Shepherds Bush, London, W12 0HS</p> <p>David, Anna; University College London Medical School, Institute for Womens Health</p> <p>Khalil, Asma; St. George's Medical School, University of London</p> <p>Shennan, Andrew; Kings College London, Maternal and Fetal Research Unit</p> <p>Hodgetts Morton, Victoria ; Birmingham Women's Hospital, Metchley Park Road, Edgbaston, ,</p> <p>Lavender, Tina; Manchester University</p> <p>Khan, Khalid; Queen Mary, University of London, Centre for Primary Care and Public Health</p> <p>Harper-Clarke, Susan; PPI Representative</p> <p>Mol, Ben; University of Adelaide, The Robinson Institute, School of Paediatrics and Reproductive Health</p> <p>Riley, Richard; Keele University</p> <p>Norrie, John; Edinburgh Clinical Trials Unit, University of Edinburgh No. 9, Bioquarter</p> <p>Norman, Jane; University of Edinburgh</p> |
| <b>Primary Subject Heading</b>: | Obstetrics and gynaecology                                                                                                                                                                                                                                                                                                                                                                                                                                                                                                                                                                                                                                                                                                                                                                                                                                                                                                                                                                                                                                                                                                                                                                                                                                                                                                                                                                                                                                                                                                                                                                                                                                                    |
| Secondary Subject Heading:      | Health economics, Diagnostics                                                                                                                                                                                                                                                                                                                                                                                                                                                                                                                                                                                                                                                                                                                                                                                                                                                                                                                                                                                                                                                                                                                                                                                                                                                                                                                                                                                                                                                                                                                                                                                                                                                 |
| Keywords:                       | Pregnancy, Preterm Birth, Fetal Fibronectin, Cervix, Diagnostic Test                                                                                                                                                                                                                                                                                                                                                                                                                                                                                                                                                                                                                                                                                                                                                                                                                                                                                                                                                                                                                                                                                                                                                                                                                                                                                                                                                                                                                                                                                                                                                                                                          |
|                                 |                                                                                                                                                                                                                                                                                                                                                                                                                                                                                                                                                                                                                                                                                                                                                                                                                                                                                                                                                                                                                                                                                                                                                                                                                                                                                                                                                                                                                                                                                                                                                                                                                                                                               |

1  
2  
3  
4  
5  
6  
7  
8  
9  
10  
11  
12  
13  
14  
15  
16  
17  
18  
19  
20  
21  
22  
23  
24  
25  
26  
27  
28  
29  
30  
31  
32  
33  
34  
35  
36  
37  
38  
39  
40  
41  
42  
43  
44  
45  
46  
47  
48  
49  
50  
51  
52  
53  
54  
55  
56  
57  
58  
59  
60

SCHOLARONE™  
Manuscripts

For peer review only



1  
2  
3 **1 Study Protocol: Quantitative Fibronectin to help Decision-making in women**  
4 **2 with Symptoms of Preterm Labour (QUIDS) Part Two- UK Prospective Cohort**  
5  
6 **3 Study**

7  
8  
9 4 Sarah J Stock\*<sup>1,2</sup> Sarah.Stock@ed.ac.uk  
10  
11 5 Lisa Wotherspoon<sup>1</sup> Lisa.Wotherspoon@ed.ac.uk  
12  
13 6 Kathleen Boyd<sup>3</sup> Kathleen.Boyd@glasgow.ac.uk  
14  
15 7 Rachel K Morris<sup>4</sup> r.k.morris@bham.ac.uk  
16  
17 8 Jon Dorling<sup>5</sup> Jon.Dorling@nottingham.ac.uk  
18  
19 9 Lesley Jackson<sup>6</sup> Lesley.Jackson@ggc.scot.nhs.uk  
20  
21 10 Manju Chandiramani<sup>7</sup> m.chandiramani@imperial.ac.uk  
22  
23 11 Anna David<sup>8</sup> a.david@ucl.ac.uk  
24  
25 12 Asma Khalil<sup>9</sup> akhalil@sgul.ac.uk  
26  
27 13 Andrew Shennan<sup>10</sup> andrew.shennan@kcl.ac.uk  
28  
29 14 Victoria Hodgetts-Morton<sup>4</sup> v.a.h.morton@bham.ac.uk  
30  
31 15 Tina Lavender<sup>11</sup> Tina.Lavender@manchester.ac.uk  
32  
33 16 Khalid Khan<sup>12</sup> k.s.khan@qmul.ac.uk  
34  
35 17 Susan Harper-Clarke<sup>13</sup> su\_clarke@hotmail.com  
36  
37 18 Ben Mol<sup>14</sup> ben.mol@adelaide.edu.au  
38  
39 19 Richard D. Riley<sup>15</sup> r.riley@keele.ac.uk  
40  
41 20 John Norrie<sup>16</sup> J.Norrie@ed.ac.uk  
42  
43 21 Jane Norman<sup>1</sup> Jane.Norman@ed.ac.uk

44 22 1. Tommy's Centre for Maternal and Fetal Health, University of Edinburgh MRC  
45 23 Centre for Reproductive Health, Queen's Medical Research Institute, Edinburgh, UK.  
46  
47 24 2. School of Women's and Infants' Health, University of Western Australia, Crawley  
48  
49 25 WA 6009, AUS. 3. Institute of Health & Wellbeing Health Economics & Health  
50  
51 26 Technology Assessment, University of Glasgow, 1 Lilybank Gardens, Glasgow, UK.  
52  
53 27 4. School of Clinical and Experimental Medicine, University of Birmingham,  
54  
55 28 Birmingham, UK. 5. Queen's Medical Centre, Neonatal Unit, Derby Road,  
56  
57  
58  
59  
60

1  
2  
3 1 Nottingham, UK. 6. Royal Hospital for Children Glasgow, Neonatal Unit  
4  
5 2 Glasgow, UK. 7. Imperial College Healthcare NHS Trust, Queen Charlotte and  
6  
7 3 Chelsea Hospital, Du Cane Road, Shepherds Bush, London, UK. 8. University  
8  
9 4 College London Medical School, Institute for Women's Health Health, 86-96 Chenies  
10  
11 5 Mews, University College London Medical School London, UK. 9. St. George's  
12  
13 6 Medical School, University of London, London, UK. 10. Kings College London,  
14  
15 7 Maternal and Fetal Research Unit Maternal and Fetal Research Unit 10th Floor,  
16  
17 8 North Wing London, UK. 11. University of Manchester School of Nursing, Midwifery &  
18  
19 9 Social Work, Jean McFarlane Building, University Place, Oxford Road  
20  
21 10 Manchester, UK. 12. Queen Mary, University of London, Centre for Primary Care and  
22  
23 11 Public Health London, UK. 13. Patient and Public Involvement Representative. No  
24  
25 12 affiliation. 14. University of Adelaide, The Robinson Institute, School of Paediatrics  
26  
27 13 and Reproductive Health Adelaide, SA, AUS. 15. Research Institute for Primary Care  
28  
29 14 and Health Sciences, Keele University, Keele, UK. 16. Edinburgh Clinical Trials Unit,  
30  
31 15 University of Edinburgh No. 9, Bioquarter Edinburgh, UK.

32  
33 16

34  
35 17 \*Corresponding Author: Dr Sarah J Stock Senior Clinical Lecturer Maternal and Fetal  
36  
37 18 Medicine, MRC Centre for Reproductive Health, Queen's Medical Research Institute,  
38  
39 19 47 Little France Crescent, Edinburgh, EH16 4TJ. Tel: 0131 242 6449 Email:  
40  
41 20 [sarah.stock@ed.ac.uk](mailto:sarah.stock@ed.ac.uk)

42  
43 21

44  
45 22 **Word Count:** 5,475

46  
47 23 **Key Words:** Pregnancy; Preterm Birth; Fetal Fibronectin; Cervix; Diagnostic Test.

48  
49 24

50  
51 25

## 1     **ABSTRACT**

2     **Introduction:** The aim of the QUIDS study is to develop a decision support tool for  
3     the management of women with symptoms and signs of preterm labour, based on a  
4     validated prognostic model using quantitative fetal Fibronectin (fFN) concentration, in  
5     combination with clinical risk factors.

6     **Methods and analysis:** The study will evaluate the Rapid fFN 10Q System (Hologic,  
7     Malborough, MA) which quantifies fFN in a vaginal swab. In QUIDS Part 2 we will  
8     perform a prospective cohort study in at least eight UK consultant-led maternity units,  
9     in women with symptoms of preterm labour at 22+0 to 34+6 weeks gestation to  
10    externally validate a prognostic model developed in QUIDS Part 1. The effects of  
11    quantitative fFN on anxiety will be assessed, and acceptability of the test and  
12    prognostic model will be evaluated in a subgroup of women and clinicians (n=30).  
13    The sample size is 1600 women (with estimated 96-192 events of preterm delivery  
14    within 7 days of testing). Clinicians will be informed of the qualitative fFN result  
15    (positive/negative) but be blinded to quantitative fFN result. Research midwives will  
16    collect outcome data from the maternal and neonatal clinical records. The final  
17    validated prognostic model will be presented as a mobile or web-based application.

18    **Ethics and dissemination:** The study is funded by the National Institute of  
19    Healthcare Research Health Technology Assessment (HTA 14/32/01). It has been  
20    approved by the West of Scotland Research Ethics Committee (16/WS/0068).

21    **Registration details:** The study has been registered with ISRCTN Registry  
22    (ISRCTN 41598423) and NIHR Portfolio (CPMS: 31277)

23    **Version:** Protocol Version 2, Date 1<sup>st</sup> November 2016

## 24     **STRENGTHS AND LIMITATIONS OF THIS STUDY**

### 25     **Strengths**

- 26     •     Validation of a prognostic model in a separate prospective cohort study

- 1
- 2
- 3 • Health Economic Analysis to determine cost effectiveness from NHS
- 4 perspective
- 5
- 6
- 7
- 8
- 9

#### 4 **Limitations**

- 10 • Not a randomized control trial to test effectiveness of the model on improved
- 11 patient outcomes
- 12
- 13
- 14
- 15
- 16

#### 8 **HOW PATIENTS ARE INVOLVED IN THIS STUDY**

9 Patient representatives were consulted during the protocol development and

10 have been invited to join the Project Management Group and the Trial Steering

11 Committee. Prior to commencing QUIDS, we performed a qualitative study to

12 determine the decisional needs of pregnant women with signs and symptoms of

13 preterm labour, their partners and their caregivers. This is described in the

14 separate protocol "QUIDS Qualitative" (Supplementary Material). The end

15 product of QUIDS will be a decision support aid to help clinicians, women and

16 their partners decide on management of threatened preterm labour, based on the

17 results of the quantitative fFN. In QUIDS Qualitative women and clinicians

18 indicated that they would prefer this to be on web based or mobile app based

19 format, presenting the risk of preterm birth within seven days of testing.

20

21

## 1 INTRODUCTION

2 The overall aim of the QUIDS study is to develop a decision support tool for the  
3 management of women with symptoms and signs of preterm labour, based on a  
4 validated prognostic model using quantitative fFN testing. The study has been  
5 conceptually divided into two parts. In this, the protocol for QUIDS Part Two, we  
6 detail the protocol for a prospective cohort study. This will externally validate a  
7 prognostic model developed in QUIDS Part One.[1] More detailed background about  
8 the diagnosis of preterm labour and background to the study is provided in the  
9 introduction of QUIDS Protocol Part One.[1]

10

11 Fetal Fibronectin (fFN) is a biochemical test of preterm labour which has potential to  
12 help improve diagnosis of impending preterm delivery.[2] Much of the evidence about  
13 fFN to date relates to the qualitative fFN test, which provides a positive or negative  
14 result on the basis of a single threshold of 50ng/ml.[2,3] This test has been largely  
15 replaced with the Rapid fFN 10Q System, which provides a concentration of fFN  
16 (quantitative fFN), and as a continuous variable, may be a more useful predictor of  
17 preterm delivery. fFN is now only available with a quantitative analyser in the UK, but  
18 there is no consensus as to which women to use the test in, or how to interpret the  
19 results.

20

21 The QUIDS study will address this evidence gap by providing evidence about the  
22 potential value of the quantitative fFN test, along with guidance about how to  
23 interpret results. Here we detail the protocol for external validation of a prognostic  
24 model developed in QUIDS Part One.[1]

25

## 26 METHODS AND ANALYSIS

### 27 Aims and Methodologies

1  
2  
3 1 The aim of the QUIDS study is to develop a decision support tool for the  
4  
5 2 management of women with symptoms and signs of preterm labour, based on a  
6  
7 3 validated prognostic model using quantitative fFN testing.  
8  
9 4

10  
11 5 The study protocol has been divided into two parts (see flow chart Figure 1). The  
12  
13 6 protocols for Parts One and Two are reported in separate manuscripts.  
14  
15 7

16  
17 8 In QUIDS Protocol Part One we have described how we will perform (i) an Individual  
18  
19 9 Participant Data (IPD) meta-analysis, and (ii) and Economic Analysis. The protocol  
20  
21 10 details how we will develop and internally validate a prognostic model using  
22  
23 11 quantitative fFN (as a continuous variable) and other risk (prognostic) factors and to  
24  
25 12 evaluate the added value of quantitative fFN toward this prognostic model  
26  
27 13 performance. We will also provide an economic rationale for the prognostic model  
28  
29 14 and analyze its cost-effectiveness from the perspective of the NHS.  
30  
31 15

32  
33 16 In this, the QUIDS Protocol Part Two, we will detail the prospective cohort study to  
34  
35 17 externally validate and, if necessary, refine the prognostic model. This will be  
36  
37 18 performed in at least eight UK hospitals with different settings (rural/urban) and  
38  
39 19 different levels of neonatal care facilities. In addition, acceptability of quantitative fFN  
40  
41 20 testing, and effects on maternal anxiety will be performed. We will assess the  
42  
43 21 potential cost-effectiveness of the final prognostic model/decision support tool. This  
44  
45 22 additional analysis will allow us to model the full costs and effect impacts of the  
46  
47 23 different prognostic model and compare these in a cost-effectiveness analysis to  
48  
49 24 provide an evidence-based economic rationale for implementing the diagnostic tool  
50  
51 25 in the NHS.  
52  
53 26

## 54 27 **Endpoints**

55  
56  
57  
58  
59  
60

1  
2  
3 1 The primary endpoint of the prognostic model is spontaneous preterm delivery within  
4  
5 2 seven days of qfFN test, in women less than 36 weeks' gestation. This was  
6  
7 3 influenced by the preceding QUIDS Qualitative Study, which included focus group  
8  
9 4 consultation to determine the decisional needs of women, their partners and  
10  
11 5 clinicians (Supplementary Material). It is also a recognised clinically important  
12  
13 6 endpoint, as antenatal steroids (which significantly reduce morbidity and mortality in  
14  
15 7 preterm babies[4]) are most effective if delivery occurs within seven days of  
16  
17 8 administration.

18  
19 9  
20  
21 10 A secondary endpoint suggested by QUIDS Qualitative Study (Supplementary  
22  
23 11 Material) consultation, was delivery within 48 hours of qfFN test. This analysis will be  
24  
25 12 performed if feasible to do so within the constraints of the data available for model  
26  
27 13 development and validation.[1]

28  
29 14

### 30 15 **Health technologies being assessed**

31  
32 16 The trial will evaluate the Rapid fFN 10Q System (Hologic, Malboroughm MA). This  
33  
34 17 provides a concentration of fFN (ng/ml or INVALID) in a vaginal swab sample in 10  
35  
36 18 minutes. It is now the only commercially available fFN test system, and replaces the  
37  
38 19 TLiQ rapid analyser system, which provided a qualitative fFN result (POSITIVE or  
39  
40 20 NEGATIVE) based on a threshold of 50ng/ml. The Rapid fFN 10Q system is a point  
41  
42 21 of care test, which clinical staff can easily perform. All reagents for fFN testing can be  
43  
44 22 stored at room temperature and specimen collection kits, reagents, cassettes and the  
45  
46 23 10Q analyzer can be kept in clinical areas where women with symptoms of preterm  
47  
48 24 labour are assessed so they can be conveniently accessed.

49  
50 25

51  
52 26 Vaginal swab samples are analysed by lateral flow; solid-phase  
53  
54 27 immunochromatographic assay (the Rapid fFN Cassette), and interpreted in the 10Q  
55  
56 28 Rapid analyser. 200  $\mu$ L of the sample is pipetted into the sample application well of

1 the Rapid fFN Cassette using a polypropylene or polyethylene pipette. The sample  
2 will then flow from an absorbent pad across a nitrocellulose membrane via capillary  
3 action through a reaction zone containing murine monoclonal anti-fetal fibronectin  
4 antibody conjugated to blue microspheres (conjugate). The conjugate, embedded in  
5 the membrane, will be mobilized by the flow of the sample. The sample will then flow  
6 through a zone containing goat polyclonal antihuman fibronectin antibody that  
7 captures the fibronectin-conjugate complexes. The remaining sample will flow  
8 through a zone containing goat polyclonal anti-mouse IgG antibody that captures  
9 unbound conjugate, resulting in a control line. After 10 minutes of reaction time, the  
10 intensities of the test line and control line are interpreted with the 10Q Rapid analyser  
11 and a printed result provided as a concentration in ng/ml (0->500ng/ml) or INVALID.  
12 The result is invalid if the test does not meet internal quality controls that are  
13 performed automatically with every test. In the event of an invalid result, the test can  
14 be repeated with any remaining clinical specimen. A quality control can be performed  
15 by a reusable Rapid fFN 10Q QCette® QC Device, which verifies that the analyser  
16 performance is within specification.

## 17

### 18 **Target population**

19 The target population is pregnant women attending hospital with signs and  
20 symptoms of preterm labour.

## 21

### 22 **Validation And Refinement Of Prognostic Model**

#### 23 **Population**

24 The prospective cohort study will include women with signs and symptoms of  
25 preterm labour at 22<sup>+0</sup> to 34<sup>+6</sup> weeks gestation in whom admission, transfer or  
26 treatment is being considered. These will be recruited from at least eight sites with a  
27 mix of rural/urban settings, and have different levels of neonatal care facilities, over  
28 12 months.



1  
2  
3 1  
4  
5 2 Eligibility Criteria

6  
7 3 The following inclusion criteria will apply at screening assessment (all apply):

- 8  
9 4 • Women who are 22<sup>+0</sup> to 34<sup>+6</sup> weeks (or earlier gestation if the fetus is  
10 considered potentially viable).  
11  
12 5 • Women showing signs and symptoms of pre-term labour which may include  
13 any or all of back pain, abdominal cramping, abdominal pain, light vaginal  
14 bleeding, vaginal pressure, uterine tightenings or contractions.  
15  
16 6 • Women where hospital admission, interhospital transfer or treatment  
17 (antenatal steroids, tocolysis or magnesium sulphate) is being considered due  
18 to signs of pre-term labour.  
19  
20 7 • Women aged 16 years or above.

21  
22 13 The broad inclusion criteria reflect current clinical practice and enable the  
23 generalisability of the results of the trial for routine clinical care. We will include  
24 women who re-attend seven days or more after initial recruitment with signs and  
25 symptoms of preterm labour and also women who remain symptomatic but  
26 undelivered seven days later in whom repeat testing by the clinician is deemed to be  
27 appropriate. This will be in line with manufacturer's recommendation for fFN testing.  
28  
29  
30  
31  
32  
33  
34  
35  
36  
37  
38  
39  
40

41 20 The following inclusion criteria will apply on speculum examination:

- 42 21 • Cervical dilation  $\leq$  3cm  
43  
44 22 • Intact membranes  
45  
46 23 • No significant vaginal bleeding, as judged by the clinician.  
47  
48 24 • Once it has been established that the women meets the above criteria, on  
49 speculum examination, the fFN swab can be taken.  
50  
51

52  
53 26 Participants that sign the consent but are not eligible upon examination to have an  
54 fFN swab taken will still be enrolled and have outcome data collected.  
55  
56  
57  
58  
59  
60

1  
2  
3 14  
5 2 The following exclusion criteria will apply:

- 6  
7 3 • Contraindication to vaginal examination (e.g. placenta praevia).
- 8  
9 4 • Higher order multiple pregnancy (triplets or more).
- 10  
11 5 • Moderate or severe vaginal bleeding.
- 12  
13 6 • Cervical dilatation greater than 3cm.
- 14  
15 7 • Confirmed rupture of membranes.
- 16  
17 8 • Sexual intercourse, vaginal examination or transvaginal ultrasound in the
- 18  
19 9 preceding 24 hours factors may invalidate results. These women will be
- 20  
21 10 initially excluded from the study, but can be included if still symptomatic after
- 22  
23 11 24 hours, when fFN accuracy will be restored.

24  
25 1226  
27 13 Co-Enrolment

28  
29 14 This trial involves validating a decision support tool relating to a test that is currently  
30  
31 15 commonly used in clinical practice. As such, there are no additional interventions.  
32  
33 16 Co-enrolment in other non-interventional trials will be allowed. Co-enrolment in trials  
34  
35 17 of tocolytic treatments or other management strategies that may influence timing of  
36  
37 18 delivery as a primary outcome will not be allowed. Participation in QUIDs would not  
38  
39 19 preclude babies being subsequently involved in interventional trials. Co-enrolment  
40  
41 20 will be recorded in the electronic case report form (eCRF).

42  
43 2144  
45 22 Setting

46  
47 23 The prospective cohort study will take place in at least eight consultant-led obstetric  
48  
49 24 units in the UK. More than 93% of pregnant women in the UK deliver in consultant-  
50  
51 25 led units.[5,6] The vast majority of women with symptoms of preterm labour will  
52  
53 26 present to a consultant-led unit for assessment, either directly or following advice  
54  
55 27 from their community midwife or General Practitioner.

1  
2  
3 1  
4  
5 2 The study will not include any community maternity units (staffed by midwives, with  
6  
7 3 or without involvement of non-obstetric medical staff), which cover a small proportion  
8  
9 4 of women, mainly in remote and rural areas. In the Perinatal Collaborative Transport  
10  
11 5 Study (CoTS study) of perinatal transfers in Scotland,[7] which involved 52,727  
12  
13 6 births, only 69 (0.13%) women were transferred to a consultant-led obstetric unit  
14  
15 7 from community maternity units, and only a proportion of these were for suspected  
16  
17 8 preterm labour. The small number of women cared for in community maternity units  
18  
19 9 means their inclusion would not be an efficient use of study resources.

20  
21 10  
22  
23 11 Given that management of women with symptoms of preterm labour and inter-  
24  
25 12 hospital transfer patterns are likely to vary depending on level of available neonatal  
26  
27 13 care and distance to transfer, we will include a mixture of hospitals with different  
28  
29 14 levels of neonatal care facilities in both rural and urban settings. We will include units  
30  
31 15 with Special Care Units (providing special care for their own local population), Local  
32  
33 16 Neonatal Units (providing special care and high dependency care and a restricted  
34  
35 17 volume of intensive care) and Neonatal Intensive Care Units (larger intensive care  
36  
37 18 units providing the whole range of medical, and sometimes surgical neonatal care for  
38  
39 19 their local population and for babies and their families referred from the neonatal  
40  
41 20 network in which they are based, and other networks when necessary). The hospitals  
42  
43 21 will be chosen from different geographical settings (rural/urban) and from different  
44  
45 22 regions of the UK.

46  
47 23  
48  
49 24 If additional units wish to participate in the study we will consider including them, to  
50  
51 25 increase recruitment rates. The UK Reproductive Health and Childbirth specialty  
52  
53 26 group (clinical study group) have contributed to the study protocol and support the  
54  
55 27 proposed trial.

56  
57 28  
58  
59  
60

## 1 Participant Selection And Enrolment

2 Women with signs and symptoms of preterm labour will be identified on presentation  
3 to obstetric services. A member of clinical staff, usually the doctor or midwife  
4 assessing the woman, will identify potentially eligible participants, provide a  
5 participant information leaflet and invite consent. A suitably trained member of clinical  
6 staff (doctor or midwife) or research team will consent participants.

7  
8 Posters and leaflets will be situated in antenatal areas of participating hospitals to  
9 alert women that the study is taking place, and women will be allowed as much time  
10 as possible to consider participation without unduly delaying further clinical  
11 assessment. Participants will receive adequate oral and written information and  
12 appropriate participant information and informed consent forms will be provided.

## 14 Screening For Eligibility

15 The clinical likelihood of preterm delivery is usually evaluated by history and  
16 examination, which includes abdominal palpation, to assess strength and frequency  
17 of uterine contractions. If preterm labour is suspected, a vaginal speculum  
18 examination is performed where the cervix is inspected for dilatation, and evidence of  
19 vaginal bleeding and membrane rupture assessed. Swabs for fFN are usually taken  
20 at this point. Potential participants in the QUIDS study will be identified after the initial  
21 assessment and provided with information about the study. A combined 'Screening  
22 and Consent Form' will be used as a self-screening tool for potentially eligible  
23 participants. Informed consent will take place before speculum examination and the  
24 fFN swab has been taken. This approach means that samples are collected at  
25 routine speculum examination, as they would be if fFN is implemented in clinical  
26 practice, and participants avoid an additional vaginal examination.

## 28 Ineligible And Non-Recruited Participants

1  
2  
3 1 Certain exclusion criteria can only be assessed at speculum examination (for  
4 2 example vaginal bleeding or evidence of ruptured membranes), so a proportion of  
5 3 women will not be eligible for fFN testing after consent is given. These women will  
6 4 still be enrolled and delivery outcomes collected. The decision whether to use this  
7 5 data for analysis will be the decision of the Chief Investigator and Statisticians.  
8  
9  
10  
11  
12  
13  
14  
15

#### 16 7 Withdrawal Of Study Participants

17 8 Women will be able to withdraw consent for us of their data at any time until the end  
18 9 of the study.  
19  
20  
21  
22

#### 23 11 Study Assessments (See Table 1)

##### 24 12 *Eligibility Assessment (Screening And Recruitment)*

25 13 Women presenting with signs and symptoms of pre-term labour will be identified on  
26 14 presentation to obstetric services. The doctor or midwife assessing the woman will  
27 15 identify potentially eligible participants and provide an invitation letter and short  
28 16 information leaflet.  
29  
30  
31  
32  
33  
34  
35

36 18 After the woman has had the opportunity to consider whether she would like to  
37 19 participate, she will be asked to complete the Screening and Consent Form. The  
38 20 clinician will then decide whether the fFN test can be carried out. If the test can be  
39 21 carried out (according to manufacturer's guidelines), then the participant will be fully  
40 22 enrolled and that their delivery outcomes will still be collected.  
41  
42  
43  
44  
45  
46  
47

48 24 If the woman declines to participate and she is willing to provide a reason for this, the  
49 25 reason given will be entered on to an anonymous log. Baseline demographics will be  
50 26 collected on consenting women, together with height and weight, information on  
51 27 medical history, obstetric history, estimated date of delivery and presenting signs and  
52 28 symptoms.  
53  
54  
55  
56  
57  
58  
59  
60

1  
2  
3 1  
4  
5 2 The original consent form will be stored in the Investigator Site File (ISF) file, a copy  
6  
7 3 is given to the woman, a copy added to the medical notes and a copy sent to the  
8  
9 4 Trial Office.

10  
11 5  
12 6 After providing consent, the participant will be asked to complete a short State Trait  
13  
14 7 Anxiety Inventory (STAI) questionnaire and complete a contact details form. They will  
15  
16 8 also be issued with a letter thanking them for taking part in the trial and giving details  
17  
18 9 of the second questionnaire to be completed.

20  
21 10  
22  
23 11 *Sample Collection*

24 12 Samples for analysis will be taken with a fFN specimen collection kit, which consists  
25  
26 13 of a sterile polyester tipped swab and a specimen transport tube containing 1 ml  
27  
28 14 extraction buffer (an aqueous solution containing protease inhibitors and protein  
29  
30 15 preservatives including aprotinin, bovine serum albumin, and sodium azide). During  
31  
32 16 speculum examination the sterile swab will be lightly rotated across the posterior  
33  
34 17 fornix of the vagina for ten seconds to absorb vaginal secretions. Samples should be  
35  
36 18 taken before any other swabs (e.g. for microbiology) or cervical manipulation and the  
37  
38 19 speculum lubricated with normal saline as other lubricants may interfere with the  
39  
40 20 antibody-antigen reaction of the test. Following specimen collection the swab should  
41  
42 21 be removed, immersed in extraction buffer, the shaft of the swab snapped off, and  
43  
44 22 the transport tube sealed.

45  
46 23  
47  
48 24 Before analysis samples are gently mixed and as much liquid as possible expressed  
49  
50 25 from the swab by rolling the tip against the inside of the tube.

51  
52 26  
53  
54 27 *Initial fFN test*

1  
2  
3 1 The sample taken will be run at a near bedside Hologic Rapid fFN 10Q analyser,  
4  
5 2 specially adapted for the QUIDS study. As fFN (or other similar biochemical tests of  
6  
7 3 preterm labour) are part of standard care, it would be unethical to blind clinicians  
8  
9 4 from the qualitative fFN result. The analyser will thus reveal a qualitative fFN result  
10  
11 5 (positive/negative/invalid based on a 50ng/ml threshold) for clinicians to base clinical  
12  
13 6 decision-making on, according to local protocols. The quantitative fFN result  
14  
15 7 however, will be stored as a three-letter code, blinding caregivers from the result.  
16  
17 8 Samples will be run as per manufacturers instructions (described above in the  
18  
19 9 section "Health technologies being assessed").  
20

21

#### 22 *Repeat fFN Tests*

23  
24 12 If there is clinical indication for further fFN tests (eg because of ongoing symptoms of  
25  
26 13 preterm labour after seven days), the results will also be recorded.  
27

28  
29 14

#### 30 *Labour/Delivery/ Neonatal Assessments*

31  
32 16 Admission for delivery will not be a formal study visit but data will be collected using  
33  
34 17 information recorded in the participant's notes. Delivery data will be collected on the  
35  
36 18 maternal outcomes of delivery, including method of delivery, indication for delivery  
37  
38 19 method, onset of labour, date and gestation of delivery and blood loss.  
39

40  
41 20

#### 42 *Questionnaires*

43  
44 22 All participants who are eligible to participate will be asked to complete a STAI  
45  
46 23 questionnaire before the speculum examination. The same questionnaire will be  
47  
48 24 repeated 24-48 hours post examination. The second questionnaire will be provided  
49  
50 25 on paper with a pre-paid envelope to be returned by post to the Trial Office. If not  
51  
52 26 returned by post, the Trial Office may try to contact the participant (with the contact  
53  
54 27 details provided), to complete the questionnaire over the phone.  
55

1  
2  
3  
4  
5  
6  
7  
8  
9  
10  
11  
12  
13  
14  
15  
16  
17  
18  
19  
20  
21  
22  
23  
24  
25  
26  
27  
28  
29  
30  
31  
32  
33  
34  
35  
36  
37  
38  
39  
40  
41  
42  
43  
44  
45  
46  
47

| Visit                                                    | Attendance with signs and symptoms preterm labour |        |            |          |
|----------------------------------------------------------|---------------------------------------------------|--------|------------|----------|
|                                                          | Screening and Recruitment                         | 24-48h | 1-6 months | DELIVERY |
| Inclusion/Exclusion Criteria                             | ⊙                                                 |        |            |          |
| Participant Information Sheet                            | ⊙                                                 |        |            |          |
| Consent Form                                             | ⊙                                                 |        |            |          |
| Demographics                                             | ⊙                                                 |        |            |          |
| Obstetric History                                        | ⊙                                                 |        |            |          |
| Symptoms and Signs                                       | ⊙                                                 |        |            |          |
| Quantitative fFN (concentration ng/ml)                   | ⊙                                                 |        |            |          |
| Cervical length scan (if available)                      | ⊙                                                 |        |            |          |
| State Trait Anxiety Inventory Questionnaire              | ⊙                                                 | ⊙      |            |          |
| Delivery details                                         |                                                   |        |            | ⊙        |
| Neonatal outcomes                                        |                                                   |        |            | ⊙        |
| Qualitative Acceptability Questionnaires (subgroup n=30) |                                                   |        | ⊙          |          |

Table 1: QUIDS Study Assessments



1 Safety and Quality Assessments

2 The Hologic Rapid fFN 10Q analyzer has integrated quality control measures, and  
3 we will keep records of these as well as any additional staff training that occurs after  
4 the study starts. It is recommended that a daily pre-calibrated reusable quality control  
5 cassette be inserted and analysed every 24 hours to verify that the analyser  
6 performance is within specification. A daily quality control (QC) should be performed  
7 if one has not been done in the preceding 24 hours before a patient test is to be  
8 done. Logs of results are stored on the machine and can be downloaded, and we will  
9 also ask the participating sites to keep a monthly paper log of QC tests done. Each  
10 patient test has an internal quality control, with a procedural control line that verifies  
11 the threshold level of signal by the instrument. Sample flow detection ensures the  
12 sample travels across the cassette properly, and confirms absence of conjugate  
13 aggregation. We believe that these measures will help ensure the validity of results.  
14 However, to provide further evidence of integrity and comparability of results from  
15 each site we will request that all participating sites enrol in the Wales External Quality  
16 Assurance Scheme (WEQAS) Point of Care Quality Assurance Scheme. WEQAS will  
17 provide a sample for analysis to each site bimonthly, and provide reports on analyser  
18 performance and variability.[8]

19  
20 Data Collection

21 *Data For Prognostic Model Validation and Update of Health Economic Model*

22 We will collect data on all of the candidate predictors considered for inclusion in the  
23 prognostic model developed in the IPD meta-analysis (quantitative fFN  
24 concentration, previous spontaneous preterm labour, gestation at fFN test, age,  
25 ethnicity, BMI, smoking, deprivation index, number of uterine contractions in set time  
26 period, cervical dilatation, vaginal bleeding, previous cervical treatment for cervical  
27 intraepithelial neoplasia, cervical length [measured by transvaginal cervical length;  
28 when available], singleton/multiple pregnancy, tocolysis and fetal sex). Outcome data  
29 will include gestational age at delivery, date and time of delivery, administration of

1 treatments for preterm labour (steroids, antibiotics, tocolysis, magnesium sulphate)  
2 duration hospital admission, hospital transfer, onset of labour (preterm prelabour  
3 rupture of membranes; idiopathic preterm birth; medically indicated preterm birth [and  
4 indication]), place of delivery (base hospital, other hospital, outwith hospital), mode of  
5 delivery, neonatal admission, neonatal complications, perinatal mortality, congenital  
6 anomaly, sex and birthweight.

7  
8 Screening data and data about quantitative fFN testing will be collected on paper  
9 based CRFs and research midwives will input these into the web based electronic  
10 database. Clinical outcome data will be collected from the medical records.

#### 12 *Maternal Acceptability and Anxiety*

13 Maternal anxiety will be measured pre and post-test (24-48h) using the validated  
14 State Trait Anxiety Inventory (STAI) questionnaire. Acceptability of fFN testing and  
15 the decision support will be assessed using follow up interviews (face to face or  
16 telephone, according to maternal preference) which will be conducted with a sub-  
17 group of participants (n=30) purposively sampled and stratified according to  
18 geographical location, outcome (preterm labour or not) and anxiety scores.  
19 Acceptability will also be assessed in a cohort of clinicians (n=30).

#### 21 Statistics and Sample Size Calculation

22 Guidance for external validation suggests at least ten events (preterm delivery within  
23 seven days of test) are required for each covariate included in a prognostic  
24 model.[9,10] Data from the cohorts included in our IPD meta-analysis suggests an  
25 event rate of between 6 and 12%.[1] Based on these estimates a sample size of  
26 1,600 will provide 96 and 192 events (preterm delivery within 7 days).

27  
28 A UK study has shown that 8.9% of pregnant women present with symptoms of  
29 preterm labour and are eligible for quantitative fFN[11] and we anticipate 50%

1 recruitment rate is achievable, thus overall 4.5% of maternities could be recruited.  
2 We will initially include eight units in the cohort study with a combined delivery rate of  
3 approximately 36,000 per annum. We anticipate that we will achieve target  
4 recruitment within 12 months ( $1 \text{ year} * 36,000 * 0.089 * 0.5 = 1,602$ ). If however, the  
5 recruitment rate or event rate is lower than predicted, we will increase the number of  
6 sites included in the study and/or the recruitment period, to ensure that a minimum of  
7 60 events (preterm delivery within 7 days of test) are achieved, allowing for external  
8 validation of at least six covariates in our model.

9  
10 It is possible that the IPD meta-analysis will find there is potential added value of  
11 combining quantitative fFN testing with cervical length measurement.[12,13] As  
12 cervical length measurement has significant resource requirement (estimated NHS  
13 cost £68.16 per test) and lack of out of hours provision further limits availability in  
14 many NHS hospitals, we think it is very unlikely that cervical length scanning will  
15 improve performance of the prognostic model to such a degree as to make it cost  
16 effective. We will assess the incremental costs and effects of cervical length  
17 measurement in the proposed health economic model performed in parallel with the  
18 IPD meta-analysis, and will feed into design considerations during the first iteration of  
19 the prognostic model.

20  
21 If inclusion of cervical length ultrasound is found to be potentially cost-effective, we  
22 will assess the feasibility of including it in the prospective cohort study. We anticipate  
23 that including cervical length measurement in the prospective cohort study would be  
24 extremely difficult in the current NHS setting as the majority of units do not have 24  
25 hour availability of transvaginal ultrasound and/or trained personnel to perform scans.  
26 Inclusion of cervical length would also likely decrease recruitment rate (due to need  
27 for additional transvaginal ultrasound examination) and require significant additional  
28 resources.

29

1           1    Analysis

2           2    *Validation Of Prognostic Model*

3           3    The prognostic model developed in the IPD will be externally validated using data  
4           4    collected in the prospective cohort data, using the measures of discrimination and  
5           5    calibration described in QUIDS Protocol Part One,[1] including  $R^2$ , C statistic,  
6           6    calibration slope, calibration-in-the-large, and calibration plots of observed versus  
7           7    predicted risks across deciles (with Loess smoother). The average performance of  
8           8    the model will be summarised across the centers in the cohort study. Between-center  
9           9    heterogeneity in performance will also be summarised, and reduced (if necessary) by  
10          10   recalibration techniques regarding the strategy for the choice of baseline risk  
11          11   (intercept). That is, the predictor effects will not be modified from the IPD meta-  
12          12   analysis model, but the intercept may need to be tailored to improve validation in UK  
13          13   centers (e.g. for rural settings). Based on the findings, a final model and its  
14          14   implementation strategy will then be recommended for use.

15           15   

16          16    *Economic Analysis*

17          17    The economic model will be refined, integrated and updated with data from the  
18          18    prospective study cohort, so as the most up to date and validated evidence is used to  
19          19    inform a cost-effectiveness decision. Such an iterative approach to economic  
20          20    evaluation is now well established.[14,15] The care pathway following diagnosis will  
21          21    be included in the economic analysis, using data from the cohort study such as the  
22          22    diagnostic test accuracy data, resource use data (i.e. steroid use, other medications,  
23          23    time in hospital, hospital transfer) and secondary outcome data (i.e., treatment of  
24          24    side-effects, morbidity, mortality) so as to capture the full costs and effect impacts  
25          25    (quality of life, morbidity and mortality) for both the mother and baby. Resource use  
26          26    data will be combined with unit cost information from the British National  
27          27    Formulary[16] and NHS reference costs.[17,18] Outcomes will be reported as the  
28          28    incremental cost per correct diagnosis, and incremental cost per Quality Adjusted  
29          29    Life Year (QALY) gained of the qfFN prognostic model compared to current practice

1 (no qualitative fFN model). The analysis will adhere to the NICE reference case and  
2 the recommended guidelines for decision modeling and reporting of economic  
3 analyses.[18] Probabilistic sensitivity analysis will be undertaken to explore how  
4 uncertainty in the model inputs impact on the cost-effectiveness outcome.[19]

#### 6 *Acceptability of fFN Testing and Effects on Anxiety*

7 Maternal anxiety will be measured before and after quantitative fFN testing using the  
8 validated STAI. The STAI Form Y is a widely used tool for measuring both temporary  
9 "state anxiety" and the more general, long-standing "trait anxiety". The STAI is  
10 designed for the self-reported assessment of the intensity of feelings of  
11 apprehension, tension, nervousness, and worry. STAI-Anxiety scores increase in  
12 response to physical danger and psychological stress, making it highly appropriate  
13 for this study. The use of STAI in pregnancy studies is discussed by Hundley, et al  
14 and we will interpret the results accordingly.[20]

16 The questionnaire will be administered prior to fFN testing (baseline) and 24-48  
17 hours after the test, to assess early reactions to the test and any acute anxiety  
18 prompted by the result of the test. We will also be able to assess any differences in  
19 those presented with a high risk or low risk result. Although it might be interesting to  
20 assess anxiety again in the latter stages of pregnancy, it is likely that, in this  
21 population, many pregnancies will not reach full term. Thus we believe our strategy of  
22 repeat questionnaire administration will allow measurement of longer term anxiety  
23 induced or alleviated by the test, whilst minimising bias due to preterm or term  
24 delivery itself or loss to follow up.

26 Follow up interviews will be performed with a sub-group of participants (n=30) to  
27 enable deeper exploration of women's views regarding fFN testing, to gain insight  
28 into the rationale for responses given in the questionnaires. Interviews will be  
29 conducted following confirmation of pregnancy status. Acceptability of the prognostic

1 model will also be assessed with women and a group of clinicians. All interviews will  
2 be audio recorded with consent, and field notes taken to ensure an audit trail.

3

#### 4 Decision Support

5 We will develop a decision support tool in accordance with the guidelines produced  
6 by the International Patient Decision Aid Standards (IPDAS) Collaboration.[21]  
7 Scoping of decisional requirements and how data should be presented was  
8 performed during focus group consultation as part of QUIDS Qualitative  
9 (Supplementary Material). A prototype decision support tool incorporating the initial  
10 prognostic model developed as part of the IPD-meta-analysis, will be tested with  
11 women and clinicians, as part of the acceptability studies described above. A final  
12 version will be updated with the validated (and, if necessary revised) prognostic  
13 model generated from the prospective cohort study. The multidisciplinary trial  
14 steering committee will oversee the development process, and decide how material  
15 is selected for inclusion.

16

#### 17 **Trial Management And Oversight Arrangements**

##### 18 Project Management Group

19 The trial will be coordinated by a Project Management Group (PMG), consisting of  
20 the grant holders (Chief Investigator and Co-applicants), the trial manager,  
21 representatives from the Study Office and CHaRT (the supporting CTU), plus service  
22 user representatives (PAG). The PMG will meet approximately every four months by  
23 teleconference or face to face.

24

25 The Trial Manager based in Edinburgh will oversee the study and will be accountable  
26 to the Chief Investigator. The Trial Manager supported by the trial administrator(s)  
27 will take responsibility for the day-to-day transaction of study activities. They will be  
28 supported by the CTU at CHaRT to provide expertise and guidance. The Trial  
29 Manager will be responsible for checking the CRFs for completeness, plausibility and

1 consistency. Any queries will be resolved by the Investigator or delegated member  
2 of the trial team.

3  
4  
5  
6  
7  
8  
9  
10  
11  
12  
13  
14  
15  
16  
17  
18  
19  
20  
21  
22  
23  
24  
25  
26  
27  
28  
29  
30  
31  
32  
33  
34  
35  
36  
37  
38  
39  
40  
41  
42  
43  
44  
45  
46  
47  
48  
49  
50  
51  
52  
53  
54  
55  
56  
57  
58  
59  
60

3  
4 A Delegation Log will be prepared for each site, detailing the responsibilities of each  
5 member of staff working on the trial.

6  
7 Trial Steering Committee and Data Monitoring Committee

8 A combined Trial Steering Committee and Data Monitoring Committee (TSC/DMC)  
9 will oversee the conduct and progress of the trial. The terms of reference of the  
10 Committee will be developed separately. Members of the TSC/DMC will consist of  
11 experts and two patient representatives.

## 12 13 **PATIENT AND PUBLIC INVOLVEMENT**

14 Patient representatives were consulted during the protocol development and have  
15 been invited to join the Project Management Group and the Trial Steering  
16 Committee, and will thus be involved in the recruitment to, and conduct of, the study.  
17 Co-author Susan Harper-Clarke is a patient representative. Prior to commencing  
18 QUIDS, we performed a qualitative study to determine the decisional needs of  
19 pregnant women with signs and symptoms of preterm labour, their partners and their  
20 caregivers. This is described in the separate protocol "QUIDS Qualitative"  
21 (Supplementary Material). The end product of QUIDS will be a decision support aid  
22 to help clinicians, women and their partners decide on management of threatened  
23 preterm labour, based on the results of the quantitative fFN. In QUIDS Qualitative  
24 women and clinicians indicated that they would prefer this to be on web based or  
25 mobile app based format, presenting the risk of preterm birth within seven days of  
26 testing. Social media will be used to signpost publications and conference  
27 presentations and highlight important findings. Twitter and Facebook will be used to  
28 disseminate findings to professional organizations, charities, stakeholders and the

1 public. Communication to the general public will further be facilitated by our close  
2 links with charities such as Tommy's.[22]  
3  
4

5  
6  
7  
8  
9  
10  
11  
12  
13  
14  
15  
16  
17  
18  
19  
20  
21  
22  
23  
24  
25  
26  
27  
28  
29  
30  
31  
32  
33  
34  
35  
36  
37  
38  
39  
40

#### 4 **ETHICS AND DISSEMINATION**

5 The study will be conducted in accordance with the principles of Good Clinical  
6 Practice (GCP). A favorable ethical opinion has been obtained from the appropriate  
7 REC (reference 16/WS/0068) and local R&D approval will be obtained prior to  
8 commencement of the study at each site.  
9

10 On completion of the study, the study data will be analysed and tabulated, and a  
11 clinical study report will be prepared in accordance with GCP guidelines. Results will  
12 be communicated to the academic community via the scientific literature, attendance  
13 at conferences and invited presentations. Summaries of results will also be made  
14 available to investigators for dissemination within clinics. We anticipate that the  
15 decision support will be made available as web based application that will be made  
16 freely available so clinicians can access it easily and it can be readily translatable  
17 into UK practice. If it is found to be effective in ruling out preterm delivery, it is likely  
18 that it will decrease unnecessary costly, and potentially harmful treatments in women  
19 who have symptoms suggestive of preterm labour but do not deliver early.  
20

#### 21 **PEER REVIEW**

22 The study was extensively peer reviewed as part of the process of gaining grant  
23 funding from the NIHR HTA (14/32/01).  
24

47  
48  
49  
50  
51  
52  
53  
54  
55  
56  
57  
58  
59  
60



## 1        1        **FUNDING**

2        2        This project was funded by the National Institute of Healthcare Research Health  
3        3        Technology and Assessment (Reference 14/32/01). The views expressed are those  
4        4        of the authors and not necessarily those of the NHS, the NIHR or the Department of  
5        5        Health.  
6        6       

## 7        7        **CONTRIBUTIONS TO AUTHORSHIP**

8        8        SJS, KB, RKM, JD, LJ, MC, AD, AK, AS, VHM, TL, KK, SHC, BM, RDR, JN and JEN  
9        9        developed the protocol. SJS, LW, RDR, KB, TL and JN drafted the protocol. RKM,  
10      10      JD, LJ, MC, AD, AK, AS, VHM, KK, SHC, BM and JEN reviewed and commented on  
11      11      the protocol.  
12      12     

## 13      13      **COMPETING INTERESTS**

14      14      SJS and JEN work at the University of Edinburgh, who received £1000 sponsorship  
15      15      from Hologic to support a meeting (The Society of Reproductive Investigation and  
16      16      MRC Centre for Reproductive Health Scientific Symposium on Targeting  
17      17      Inflammation to Improve Reproductive Health across the Lifecourse – August 2017).

18      18      AS has in the past (over last five years; not in the last three years) received funding  
19      19      for expenses related to advisory board and internal staff education from Hologic.

20      20      MC received sponsorship from Hologic to organise an educational teaching focusing  
21      21      on prediction of Preterm Birth at the 2017 annual meeting of the British Maternal and  
22      22      Fetal Medicine Society.

23      23      Hologic, the makers of fFN have provided analysers and technical support for their  
24      24      use to sites participating in the QUIDS prospective cohort study. They have no  
25      25      access to the data, or other involvement in the conduct, data analysis, interpretation  
26      26      of results or decision to publish the results of the study.  
27      27

**1 REFERENCES**

- 2 1. Stock SJ, Wotherspoon L, Boyd K et al. Study Protocol: Quantitative Fibronectin to  
3 help Decision-making in women with Symptoms of Preterm Labour (QUIDS)  
4 Part One- Individual Patient Data Meta-analysis and Health Economic  
5 Analysis. *Submitted to BMJ Open alongside this manuscript(see*  
6 *supplementary information)*
- 7 2. Honest H, Forbes CA, Duree KH, et al. Screening to prevent spontaneous preterm  
8 birth: systematic reviews of accuracy and effectiveness literature with  
9 economic modelling. *Health Technol Assess* 2009;13(43):1-627
- 10 3. Deshpande SN, van Asselt AD, Tomini F, et al. Rapid fetal fibronectin testing to  
11 predict preterm birth in women with symptoms of premature labour: a  
12 systematic review and cost analysis. *Health Technol Assess* 2013;17(40):1-  
13 138
- 14 4. Roberts D, Brown J, Medley N, Dalziel SR. Antenatal corticosteroids for  
15 accelerating fetal lung maturation for women at risk of preterm birth.  
16 *Cochrane Database Syst Rev* 2017;3:CD004454
- 17 5. Office for National Statistics (2013). ONS gestation-Specific Infant Mortality in  
18 England and Wales 2011. Cardiff ONS, 2013. Also available at:  
19 [https://www.ons.gov.uk/peoplepopulationandcommunity/healthandsocialcare/  
20 causesofdeath/bulletins/pregnancyandethnicfactorsinfluencingbirthsandinfant  
21 mortality/2013-10-10](https://www.ons.gov.uk/peoplepopulationandcommunity/healthandsocialcare/causesofdeath/bulletins/pregnancyandethnicfactorsinfluencingbirthsandinfantmortality/2013-10-10) (accessed 23<sup>rd</sup> November 2017).
- 22 6. Information Services Division (2013). "Births in Scottish hospitals 2012". Edinburgh  
23 National Services Scotland, 2013. Also available at:  
24 [http://www.isdscotland.org/Health-Topics/Maternity-and-  
25 Births/Publications/2013-08-27/2013-08-27-Births-Report.pdf?34511965514](http://www.isdscotland.org/Health-Topics/Maternity-and-Births/Publications/2013-08-27/2013-08-27-Births-Report.pdf?34511965514)  
26 (accessed 23<sup>rd</sup> November 2017).
- 27 7. Macintyre-Beon C, Skeoch C, Jackson L, Booth P, Cameron A. Scottish Perinatal  
28 Collaborative Transport Study. NHS Quality Improvement Scotland 2008

- 1 8. <http://www.wegas.com/services/poet-eqa/> (accessed 23<sup>rd</sup> November 2017).
- 2 9. Vergouwe Y, Steyerberg EW, Eijkemans MJ, Habbema JD. Substantial effective  
3 sample sizes were required for external validation studies of predictive logistic  
4 regression models. *J Clin Epidemiol* 2005;58(5):475-83
- 5 10. Vittinghoff E, McCulloch CE. Relaxing the rule of ten events per variable in  
6 logistic and Cox regression. *Am J Epidemiol* 2007;165(6):710-8
- 7 11. Abbott DH, Seed PT, Bennett PR et al. EQUIPP: Evaluation of Fetal Fibronectin  
8 with a novel bedside Quantitative Instrument for the Prediction of Preterm  
9 birth. *Arch Dis Child Fetal Neonatal Ed* 2014;99:A150-A51
- 10 12. van Baaren GJ, Vis JY, Wilms FF, et al. Predictive value of cervical length  
11 measurement and fibronectin testing in threatened preterm labor. *Obstet*  
12 *Gynecol* 2014;123(6):1185-92
- 13 13. DeFranco EA, Lewis DF, Odibo AO. Improving the screening accuracy for  
14 preterm labor: is the combination of fetal fibronectin and cervical length in  
15 symptomatic patients a useful predictor of preterm birth? A systematic review.  
16 *Am J Obstet Gynecol* 2013;208(3):233 e1-6
- 17 14. Ades AE, Sculpher M, Sutton A, et al. Bayesian methods for evidence synthesis  
18 in cost-effectiveness analysis. *Pharmacoeconomics* 2006;24(1):1-19
- 19 15. Sculpher MJ, Claxton K, Drummond M, McCabe C. Whither trial-based economic  
20 evaluation for health care decision making? *Health Econom* 2006;15(7):677-  
21 87
- 22 16. British National Formulary. BNF 73. 2017. .
- 23 17. Department of Health. Information Services Division. Scottish Health Service  
24 Costs Book 2012. 2012. Information Services Division.
- 25 18. National Institute for Health and Care Excellence. Guide to the Methods of  
26 Technology Appraisal: 2013. 2013 National Institute for Health and Clinical  
27 Excellence.
- 28 19. Briggs AH. Handling uncertainty in cost-effectiveness models.  
29 *Pharmacoeconomics* 2000;17(5):479-500

1 20. Hundley V, Gurney E, Graham W, Rennie AM. Can anxiety in pregnant women  
2 be measured using the State-Trait Anxiety Inventory. Midwifery  
3 1998;14(2):118-21

4 21. <http://ipdas.ohri.ca> (accessed 23rd November 2017)

5 22. <https://www.tommys.org> (accessed 23rd November 2017)

## 6 7 **Figure Legends**

### 8 **Figure 1**

9 Flow chart illustrating the design of QUIDS study and conceptual division into Part 1  
10 and Part 2

Figure 1

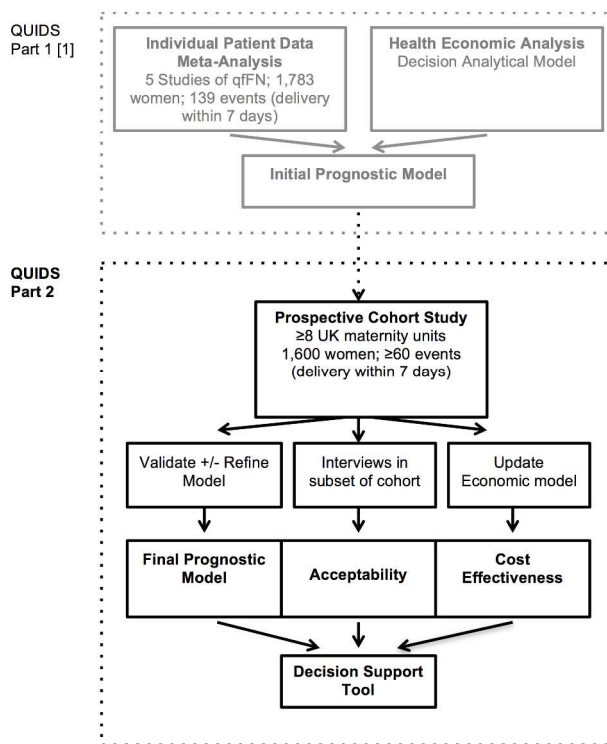

209x297mm (300 x 300 DPI)

1  
2  
3  
4  
5  
6  
7  
8  
9  
10  
11  
12  
13  
14  
15  
16  
17  
18  
19  
20  
21  
22  
23  
24  
25  
26  
27  
28  
29  
30  
31  
32  
33  
34  
35  
36  
37  
38  
39  
40  
41  
42  
43  
44  
45  
46  
47  
48  
49  
50  
51  
52  
53  
54  
55  
56  
57  
58  
59  
60

**QUIDS Qualitative**

Quantitative Fibronectin to help Decision-making in women with Symptoms of Preterm Labour:  
determining decisional requirements

**Protocol**

(October 2015)

White H, O'Brien E, Hodgetts-Moreton V, Stock S, Lavender T

## Background

Preterm birth, defined as birth prior to 37 weeks gestation, occurs in 6-7% of pregnancies in Europe<sup>1</sup> and was recorded as 5.78% in England in 2013/14, equating to over 37,000 births.<sup>2</sup> Preterm birth is associated with a high risk of mortality, wide-ranging short- and long-term morbidities,<sup>3,4</sup> and significant economic costs to the NHS compared with birth at term.<sup>5</sup> Reducing the detrimental impact of preterm birth relies on the provision of timely and appropriate perinatal interventions. However, accurate prediction of preterm birth is challenging, even when the clinical symptoms are suggestive of preterm labour. In randomised trials approximately 80% of women diagnosed with preterm labour remained pregnant after 7 days.<sup>6,7</sup>

Interventions in preterm labour and preparations for preterm birth may include administration of corticosteroids to accelerate fetal lung maturation<sup>8,9</sup> and magnesium sulphate for fetal neuroprotection,<sup>10</sup> in utero transfer to a facility with appropriate maternity and neonatal services, and tocolysis to optimise time before birth to enable these.<sup>11</sup> Whilst such interventions can improve outcomes for mothers and babies who do experience preterm birth, they are not necessarily benign, especially for those in whom preterm birth does not occur.

The maximal beneficial impact of corticosteroids occurs with administration between 48 hours and seven days before birth, thus timing is especially important in optimising benefit for the neonate. For women who remain at risk of preterm birth after seven days of the initial dose, repeated doses reduce respiratory distress in the neonate<sup>9</sup> but have been found to be associated with a dose-dependent reduction in birthweight.<sup>12,13</sup> A five-year follow-up study of women who received repeated doses of antenatal corticosteroids due to risk of preterm birth found an increased risk of neurodevelopment impairment in infants born at term.<sup>14</sup> Therefore developing a strategy to establish the optimal time to give steroids is a research priority.

1  
2  
3 Magnesium sulphate administration immediately prior to birth has been shown to reduce cerebral  
4 palsy,<sup>10</sup> but there is a risk of magnesium toxicity leading to respiratory depression in the mother and,  
5  
6 theoretically, the neonate.<sup>15</sup>  
7  
8  
9

10 Whilst there is no clear beneficial effect of tocolytics on the incidence or outcome of preterm birth,<sup>16</sup>  
11  
12 their use is recommended if the days gained prior to preterm birth can be used appropriately, for  
13  
14 example transfer to a suitable maternity unit or the administration of drugs to protect the  
15  
16 neonate.<sup>11</sup> Tocolysis is linked with various maternal and neonatal complications,<sup>17</sup> hence the need  
17  
18 for therapy targeted only for those at risk of preterm birth and close monitoring of the mother and  
19  
20 fetus throughout.  
21  
22  
23

24 Often, inpatient admission is recommended if preterm labour is suspected. Previous literature has  
25  
26 highlighted the social isolation and support needs that women with high-risk pregnancies who are  
27  
28 hospitalised experience.<sup>18</sup> In some cases, in-utero transfer is indicated to ensure that birth takes  
29  
30 place in a specialist unit with appropriate neonatal care facilities. This policy has been shown to  
31  
32 reduce mortality<sup>19,20</sup> and morbidity<sup>21</sup> in preterm neonates, especially those born very premature.  
33  
34 Qualitative research has indicated that women generally acknowledge the potential benefit of in  
35  
36 utero transfer to their baby and, hence, are willing to endure the inconvenience and upheaval that it  
37  
38 entails.<sup>22,23</sup> However, the experience is associated with an emotional, social and financial burden on  
39  
40 women and their families, especially for the substantial proportion of women who do not deliver  
41  
42 prematurely following in utero transfer. When describing their experiences of in utero transfer,  
43  
44 women expressed shock at the prospect of the transfer, feeling socially isolated, and having no  
45  
46 control over the situation, in addition to the practical difficulties experienced particularly by women  
47  
48 who already had children.<sup>22,24,25</sup> In a large survey of women who had experienced in utero transfer,  
49  
50 over a quarter lamented the financial cost<sup>24</sup> particularly with respect to their partner's outlay for  
51  
52 travel, food, accommodation, and phone bills, exacerbated with requiring time off work.<sup>22</sup>  
53  
54  
55  
56  
57

58 Furthermore, in utero transfer is costly to maternity services. Securing a maternal and neonatal bed  
59  
60



1  
2  
3 in another unit is a time-consuming task that often falls to delivery suite midwives to arrange, whilst  
4 also continuing to provide care to the woman.<sup>26</sup> In a large observational study of all in utero  
5 transfers that took place in Scotland in a six-month period, nearly one third of all transfers were due  
6 to threatened preterm labour.<sup>27</sup> Under half of the women transferred from one consultant-led unit  
7 to another gave birth within 48 hours.<sup>27</sup> Such unnecessary transfers are costly to women, their  
8 families and maternity services. Qualitative research into women's experiences of preterm labour  
9 have highlighted the need for caregivers to create an environment where women are enabled to  
10 discuss their fears<sup>28</sup> and exert control over how they manage their preterm labour care.<sup>25</sup>  
11  
12  
13  
14  
15  
16  
17  
18  
19  
20  
21  
22  
23  
24

25 Accurate prediction of preterm birth could reduce the burdens and risks associated with  
26 unnecessary interventions, and enable women and their clinicians to make informed decisions  
27 regarding their care. Numerous diagnostic tests have been used in preterm labour, including  
28 biochemical tests of vaginal secretions and cervical length.<sup>29</sup> One such test is fetal fibronectin, a  
29 near-bedside test that provides a positive or negative result and has excellent negative predictive  
30 value.<sup>30</sup> Thus fetal fibronectin can identify which women will not benefit and may be put at risk by  
31 the interventions described previously, and reduce costs to maternity services.<sup>31</sup> Developments in  
32 fetal fibronectin testing have led to a quantitative test that provides a concentration of fetal  
33 fibronectin in vaginal secretions, giving women and clinicians more information on which to base  
34 their management decisions.<sup>32</sup>  
35  
36  
37  
38  
39  
40  
41  
42  
43  
44  
45  
46  
47  
48  
49  
50

51 Qualitative evidence has indicated that women feel a sense of increased responsibility to their  
52 babies and themselves during a high risk pregnancy, such as threatened preterm labour.<sup>33</sup> Women  
53 want to be involved in decision making about their care to different degrees and feel most satisfied  
54 when their caregiver supports them to make decisions in the way they felt most comfortable.<sup>33</sup>  
55  
56  
57  
58  
59  
60

1  
2  
3 Previous literature on decision making and preterm birth has focussed on diagnostic tests<sup>6,28-32,34</sup> and  
4 the care of the preterm infant.<sup>35,36</sup> To date, there has been no investigation of what women, their  
5 partners and caregivers would like to know in order to make informed decisions about the care that  
6 is provided following the signs and symptoms of preterm labour.  
7  
8  
9  
10  
11  
12  
13  
14  
15

16 Funding has been received from the National Institute for Health Research Health Technology  
17 Assessment Programme for a large, multicentre trial to develop a mobile application decision  
18 support tool for the management of women with symptoms and signs of preterm labour, based on a  
19 validated model using quantitative fetal fibronectin testing. This study is the precursor to that trial,  
20 with the aim of determining the decisional needs of pregnant women with the symptoms and signs  
21 of preterm labour, their families and caregivers, using a qualitative framework approach. The  
22 outcomes of this qualitative study will inform the development of the mobile application decision  
23 support tool, using the findings from an individual patient data meta-analysis. The tool will then be  
24 externally validated and refined in the multi-centre trial, QUIDS.  
25  
26  
27  
28  
29  
30  
31  
32  
33  
34  
35  
36  
37  
38  
39  
40  
41  
42  
43  
44  
45  
46  
47  
48  
49  
50  
51  
52  
53  
54  
55  
56  
57  
58  
59  
60

## Methods

A qualitative framework approach will be used, based on data collected from focus groups and semi-structured telephone interviews.

## Setting

Focus groups will take place in three maternity units: Liverpool Women's NHS Foundation Trust, Birmingham Women's NHS Foundation Trust and Royal Edinburgh Hospital, NHS Lothian. There will be focus groups for women and a separate focus group for partners. Clinicians who care for women with threatened preterm birth will be interviewed by telephone.

## Sample

A purposive sample of women and partners will be recruited to cover a variety of experiences of preterm labour and birth. Women will be stratified by their prior experience and relevant characteristics, including ethnicity, previous obstetric history, living in an urban or rural setting and proximity to a tertiary neonatal referral centre. Two focus groups of 4–8 women will be conducted at each site; one for pregnant women who are at high risk of preterm birth, and one for postnatal women who have recently experienced preterm birth. One partners' focus group will be conducted at one of the sites. If women or partners are unable to attend a focus group but still wish to participate, a semi-structured telephone interview will be offered.

Up to 10 obstetricians, including trainees, midwives, and neonatologists will be purposefully recruited to cover a range of professional backgrounds and experience. Semi-structured telephone interviews will be used to collect the data.

## Eligibility

### *Principal inclusion criteria for women's antenatal focus groups*

Women who are currently pregnant who:

- Have previously experienced preterm birth following preterm labour,
- Have experienced threatened preterm labour in this pregnancy,
- Are at high risk of preterm birth for another clinical reason, such as prior cervical surgery.

### *Principal inclusion criteria for women's postnatal focus groups*

Women who have experienced preterm birth following preterm labour at <34 weeks whose babies **are stable and well** and are receiving care on the special care baby unit or neonatal intensive care unit.

### *Principal inclusion criteria for partners' focus groups*

Partners of women who fit the eligibility criteria for either focus group.

### *Principal exclusion criteria for the focus groups*

Non-English speaking individuals.

### *Principal inclusion criteria for clinician interviews*

Clinicians who care for pregnant women i.e. obstetricians (including trainees), neonatologists and midwives.

### *Principal exclusion criteria for clinician interviews*

1  
2  
3 Researchers in QUIDS or QUIDS qualitative.  
4  
5  
6  
7  
8

## 9 **Recruitment**

### 10 *Women and partners*

11  
12  
13  
14  
15 Eligible women will be identified by clinicians in the preterm birth clinic and other antenatal clinics,  
16  
17 and antenatal, triage or labour wards (for the antenatal focus groups) and the special care baby unit  
18  
19 or postnatal clinics (for the postnatal focus groups) at each site. Eligible partners will be identified by  
20  
21 the same method. Clinicians who are aware of and understand the research aims will approach  
22  
23 women and partners to request consent for a researcher to contact them. Importantly, only  
24  
25 postnatal parents whose babies are being cared for on the SCBU who are considered stable and well  
26  
27 by the clinicians will be approached. With consent the researcher will make contact to talk to the  
28  
29 women and/or their partners about the research, either face-to-face or over the telephone.  
30  
31

32  
33 Potential participants will be given the participant information sheet (PIS) (appendix \_) that is  
34  
35 relevant to them and given verbal information about the study. Each participant will be given time to  
36  
37 read the information and the opportunity to have any questions answered. Willing participants will  
38  
39 be asked to provide their written consent prior to the focus groups.  
40  
41  
42  
43  
44  
45

### 46 *Clinicians*

47  
48  
49 Eligible clinicians will be approached by the researchers, via email or face-to-face. Clinicians will be  
50  
51 given the clinician PIS (appendix \_) and the opportunity to read the information and have any  
52  
53 questions answered. Willing clinicians will be asked to provide their written consent prior to the  
54  
55 interviews.  
56  
57  
58  
59  
60

1  
2  
3 All participants (women, partners and clinicians) will be reassured that they are not compelled to  
4 participate, that they can withdraw from the study at any time, and that non-participation will not  
5 affect their care or employment in any way.  
6  
7  
8  
9

### 10 11 12 13 **Data collection**

14  
15  
16 The primary aim of this research is to determine the decisional requirements of women, their  
17 partners and clinicians for the management of preterm labour. Qualitative semi-structured  
18 interviews, in a focus-group setting or individual telephone interviews, provide a means of collecting  
19 rich, in-depth data with a specific focus.<sup>37</sup> Hence, structured topic guides will be used to initiate and  
20 concentrate the discussion (appendices 7–10).  
21  
22  
23  
24  
25  
26  
27

28  
29 Focus groups are the preferred format for eliciting the view of women and women's partners.

30  
31 Encouraging discussion among a homogenous group with a shared interest is likely to provide rich  
32 insight and understanding into the group's experiences, beliefs and norms as a result of their social  
33 interaction.<sup>38</sup> Conversely, interviewing clinicians individually avoids the potential pitfall of  
34 professional embarrassment stifling ideas in a group setting. Interviewing individual clinicians with a  
35 range of professional experience should ensure that the decisional requirements of clinicians at all  
36 levels of experience are understood.  
37  
38  
39  
40  
41  
42  
43  
44  
45  
46  
47

48  
49 Demographic details and baseline characteristics will be collected prior to the interviews, either as a  
50 self-completion questionnaire, or questions asked by the researcher over the telephone. All  
51 interviews will be audio recorded, with the participants' consent, and field notes taken. The focus  
52 groups will be facilitated by at least two researchers. This is to ensure that all pre-specified areas of  
53 interest are covered and that non-verbal communication and group interactions are documented  
54 within the field-notes, which will provide context for the data analysis. Recapping will be used to  
55  
56  
57  
58  
59  
60

clarify aspects and avoid misinterpretation. To enable all participants to talk freely, the researchers will be unknown to the participants and not working clinically in the unit where the interview is conducted. Clinicians will be interviewed by a researcher who is unknown to them.

|                                  | Site       | Interviewers |
|----------------------------------|------------|--------------|
| Women and partners' focus groups | Liverpool  | HW and EO    |
|                                  | Birmingham | HW and VH-M  |
|                                  | Edinburgh  | HW and LM    |
| Clinician interviews             | Telephone  | HW (and EO?) |

### Analysis plan

A framework approach to data analysis will be used. This approach was developed to manage and interpret large volumes of data collected to inform health policy, meaning they had focussed aims and objectives.<sup>37</sup> Likewise, this research has clear aims, as described previously, in addition to the methodological aim of collecting rich data about the experiences and beliefs of women, their partners and clinicians in relation to managing preterm labour.

Framework analysis follows specific, clearly documented stages of analysis that are transparent so that others can review the interpretation processes and understand how the findings were reached.<sup>39</sup> Transparency is particularly important in this study as the findings will inform the development of an application to aid management decisions in clinical practice. Following verbatim transcription of the interview recordings, the researchers will become familiar with the data by reading the transcripts and field-notes several times. The next stage is to develop a theoretical framework by re-reading the transcripts and making notes as recurring characteristics are

V 1.3  
21/10/15

1  
2  
3 recognised. The characteristics will then be collated into themes, which are based on the text itself,  
4 supported by the field-notes. The resulting thematic framework will be applied back to the  
5 transcripts and field-notes to check that it reflects the context of the original data. The transcripts  
6 will be coded, so that portions of text are linked to a discrete theme. A sample of transcripts will be  
7 independently coded by two people. The data will be charted and indexed to identify the preterm  
8 labour or professional experience of the participant, thus enabling the attribution of themes to a  
9 particular group. Finally, the content of the charts will be interpreted and mapped against each  
10 other to devise themes and sub-themes categories. Once again, this will involve review of the  
11 original data. Explanatory accounts will be developed to clarify the data and quotable sections of  
12 data will be identified. The final categories will be discussed between the researchers until  
13 consensus is met. The researchers will maintain reflexive journals throughout the data collection and  
14 analysis stages, recognising and ameliorating, as far as possible, the fact that their presence and  
15 assumptions impact on the data and the findings.<sup>40</sup>

16  
17 This method of data analysis creates a clear audit trail thus ensuring rigour. Each stage of analysis  
18 refers back to the original data so that context and meaning is not lost in the final framework of  
19 themes and subthemes. The data analysis process will be managed using NVivo software, a  
20 qualitative data analysis tool.

### 21 22 23 24 25 26 27 28 29 30 31 32 33 34 35 36 37 38 39 40 41 42 43 44 45 46 **Participant withdrawal**

47  
48  
49 Participants may withdraw from the study at any point. However, they will not be able to withdraw  
50 use of their data once the prognostic tool is developed.  
51  
52  
53  
54  
55  
56  
57  
58  
59  
60



## Safety

The physical safety of participants will be ensured through adhering to the health and safety policies of the host units where the focus groups take place.

The emotional wellbeing of the participants will be safeguarded by following the Distress Policy (see appendix 11). The Supervisors of Midwives (SOM) team in each unit will be informed of the study and women and their partners will be given the SOM team contact details, should they become distressed or upset as a result of talking about their experiences. Participants will also be given the contact details for accessing local counselling services.

## Good clinical practice

### *Informed consent*

All participants will be fully informed about the study and the subsequent QUIDS trial via verbal and written communication. All eligible individuals will be given the participant information sheet (appendix \_\_) and provided with an opportunity to have any questions answered. Written consent will then be gained prior to the commencement of the focus groups/interviews.

### *Confidentiality*

Demographic information will be collected from participants to attribute themes from the data to particular groups within the analysis and dissemination of findings. Demographic information, which will contain potentially identifiable information, will be kept in a secure lockable cabinet. Audio recordings will be stored on an encryptable audio device only until they are transcribed. Once transcribed the audio recordings will be deleted. Transcription services are provided by '1<sup>st</sup> Class Secretarial', who subscribe to the Data Protection Act and have also signed the Code of Practice on Data Handling. Hard copies of audio transcripts and field-notes will be kept in a separate secure

1  
2  
3 lockable cabinet to the demographic information. The transcripts and field-notes will be coded to  
4  
5 identify which participant provided that data; the codes will only be known by the researchers.

6  
7 Participant's data will not be used for any purpose other than this study and the subsequent QUIDS  
8  
9 trial.

### 10 11 12 *Data Protection*

13  
14  
15  
16 Participants will be informed that publications from this study will contain direct quotes from the  
17  
18 focus groups/interviews and categorisation of their experience of preterm labour (e.g. experienced  
19  
20 preterm birth), which could enable personal identification.

21  
22  
23 All researchers involved in this study must comply with the requirements of the Data Protection Act  
24  
25 1998 with regard to the collection, storage, processing and disclosure of personal information and  
26  
27 uphold the Act's core principles. All computers used for processing data are password protected and  
28  
29 subject to the strict data protection policies of the researcher's institution.

### 30 31 32 *Good clinical practice training*

33  
34  
35 All researchers involved in this study must hold evidence of recent Good Clinical Practice training.  
36  
37  
38  
39  
40  
41

## 42 **Additional ethical considerations**

### 43 44 45 *Expenses and reimbursement*

46  
47  
48 Participants will be reimbursed for all out of pocket expenses, for example travelling to the interview  
49  
50 site. Participants will be informed of this and how to apply for expenses reimbursement, including  
51  
52 keeping receipts for travel.  
53  
54  
55  
56  
57  
58  
59  
60

### *Safety of researchers*

An individualised risk assessment will be conducted to identify any risks to researchers or participants involved in this study. The lone working policy of the institution will be adhered to at all times. The only anticipated lone working will be during travel to and from the interview sites.

The lone working policy of the researcher's institutions mandates that researchers wear a GPS tracking and audio transmitting device during all lone-working, off-site research activity with participants. Participants will be informed if this device is being used.

### **Insurance / Indemnity**

The researcher's institution holds public liability insurance and professional indemnity insurance (appendices 12, 13 and 14).

### **Timeline**

The anticipated start date for the focus groups and interviews is 1<sup>st</sup> January 2016, to be completed within 3 months.

1  
2  
3 **Appendices**  
4

5  
6 **Appendix 1: PIS women**  
7

8  
9 **Appendix 2: PIS partners**  
10

11  
12 **Appendix 3: PIS clinicians**  
13

14  
15 **Appendix 4: Consent form women**  
16

17  
18 **Appendix 5: consent form partners**  
19

20  
21 **Appendix 6: consent form clinicians**  
22

23  
24 **Appendix 7: Interview schedule AN women**  
25

26  
27 **Appendix 8: Interview schedule PN women**  
28

29  
30 **Appendix 9: Interview schedule partners**  
31

32  
33 **Appendix 10: Interview schedule clinicians**  
34  
35  
36  
37  
38  
39  
40  
41  
42  
43  
44  
45  
46  
47  
48  
49  
50  
51  
52  
53  
54  
55  
56  
57  
58  
59  
60

For peer review only

## Appendix 11: Distress policy

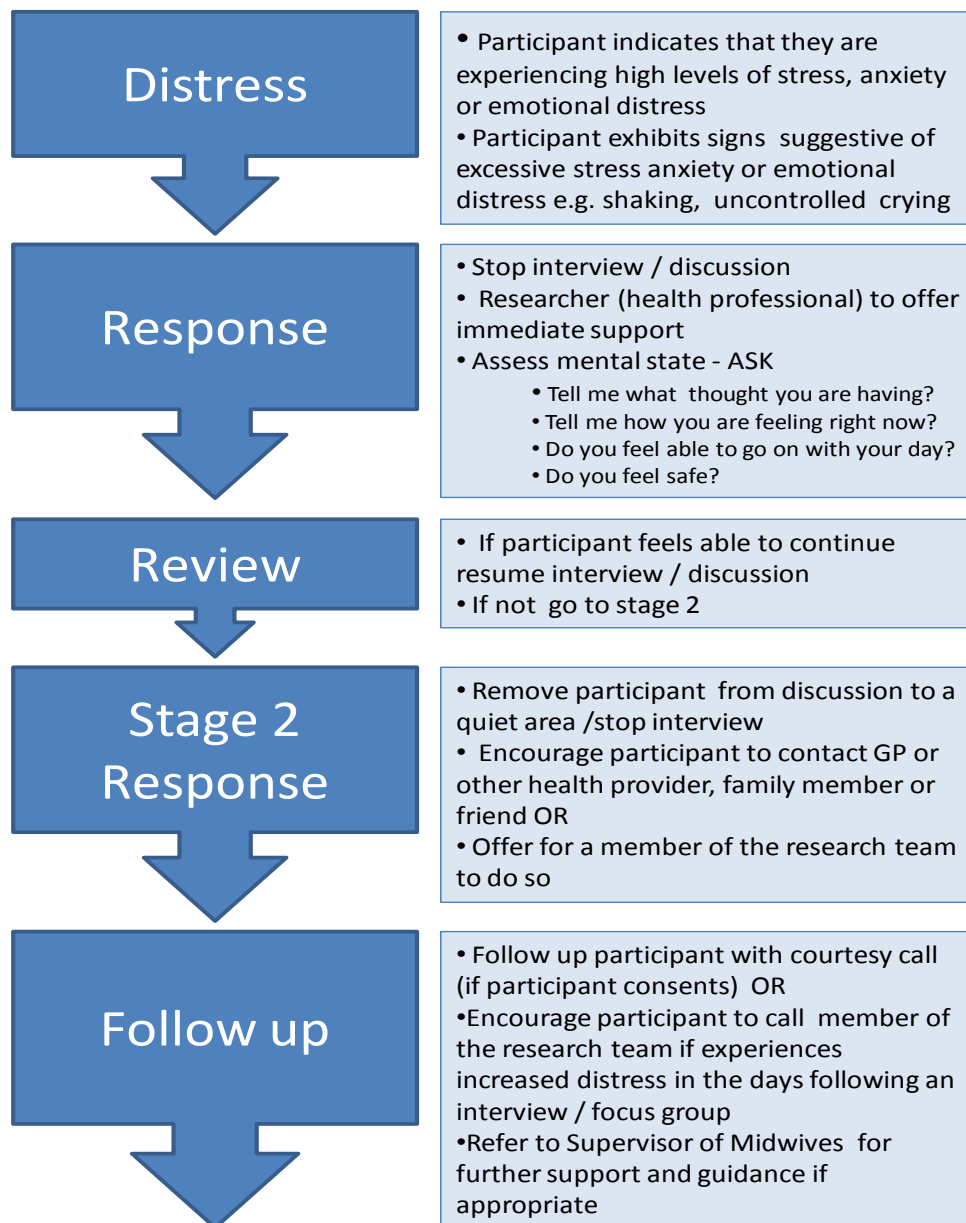

Adapted from Haigh and Witham (2010)<sup>41</sup>

1  
2  
3 **Appendix 12: Public Liability insurance**  
4  
5  
6  
7  
8  
9  
10  
11  
12  
13  
14  
15  
16  
17  
18  
19  
20  
21  
22  
23  
24  
25  
26  
27  
28  
29  
30  
31  
32  
33  
34  
35  
36  
37  
38  
39  
40  
41  
42  
43  
44  
45  
46  
47  
48  
49  
50  
51  
52  
53  
54  
55  
56  
57  
58  
59  
60

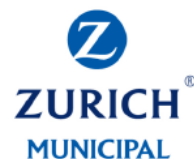

To Whom It May Concern

Our ref: SP/IND

3 June, 2015

Zurich Municipal Customer: The University of Manchester

This is to confirm that The University of Manchester have in force with this Company Public Liability Insurance until the policy expiry on 31 May 2016:

**Policy Number:** NHE-07CA03-0013

**Limit of Indemnity:** £ 50,000,000 any one claim

**Excess:** Nil any one claim

Zurich Municipal  
Zurich House  
2 Gladiator Way  
Farnborough  
Hampshire  
GU14 6GB

Telephone 0870 2418050  
Direct Phone 01252 387859  
Direct Fax 01252 375893  
E-mail alison.cliff@uk.zurich.com

Communications will be monitored regularly to improve our service and for security and regulatory purposes

Zurich Municipal is a trading name of Zurich Insurance Group Ltd

A public limited company incorporated in Ireland. Registration No. 13460  
Registered Office: Zurich House, Ballsbridge Park, Dublin 4, Ireland.

UK branch registered in England and Wales  
Registration No. BR7985.  
UK Branch Head Office: The Zurich Centre,  
3000 Parkway, Whiteley, Fareham, Hampshire  
PO15 7JZ

Authorised by the Central Bank of Ireland and subject to limited regulation by the Financial Conduct Authority. Details about the extent of our regulation by the Financial Conduct Authority are available from us on request.

Yours faithfully

A handwritten signature in black ink, appearing to read 'Nigel Smith'.

Underwriting Services  
Zurich Municipal  
Farnborough

## Appendix 13: Employers' Liability insurance

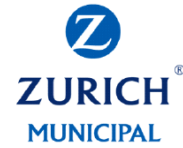

### Certificate of Employers' Liability Insurance(a)

(Where required by regulation 5 of the Employers' Liability (Compulsory Insurance) Regulations 2008 (the Regulations), a copy of this certificate must be displayed at all places where you employ persons covered by the policy or an electronic copy of the certificate must be retained and be reasonably accessible to each employee to whom it relates).

|                                             |                              |
|---------------------------------------------|------------------------------|
| Policy No.                                  | NHE-07CA03-0013              |
| 1. Name of policyholder                     | The University of Manchester |
| 2. Date of commencement of insurance policy | 01 June 2015                 |
| 3. Date of expiry of insurance policy       | 31 May 2016                  |

We hereby certify that subject to paragraph 2:

- The policy to which this certificate relates satisfies the requirements of the relevant law applicable in Great Britain, Northern Ireland, the Isle of Man, the Island of Jersey, the Island of Guernsey and the Island of Alderney (b)
- (a) the minimum amount of cover provided by this policy is no less than £5 million (c)

Signed on behalf of Zurich Insurance plc (Authorised Insurer).

Signature

Stephen Lewis

Chief Executive Officer, Zurich Insurance plc (UK Branch)

Zurich Municipal is a trading name of Zurich Insurance plc  
A public limited company incorporated in Ireland  
Registration No. 13460 Registered Office Zurich House, Ballsbridge Park, Dublin 4 Ireland.  
UK branch registered in England and Wales Registration No. BR 7985  
UK Branch Head Office The Zurich Centre, 3000 Parkway, Whiteley, Fareham, Hampshire PO15 7TZ

### Notes

- Where the employer is a company to which regulation 3(2) of the Regulations applies, the certificate shall state in a prominent place, either that the policy covers the holding company and all its subsidiaries, or that the policy covers the holding company and all its subsidiaries except any specifically excluded by name, or that the policy covers the holding company and only the named subsidiaries.
- Specify applicable law as provided for in regulation 4(6) of the Regulations.
- See regulation 3(1) of the Regulations and delete whichever of paragraphs 2(a) or 2(b) does not apply. Where 2(b) is applicable, specify the amount of cover provided by the relevant policy

Authorised by the Central Bank of Ireland and subject to limited regulation by the Financial Conduct Authority. Details about the extent of our regulation by the Financial Conduct Authority are available from us on request

1  
2  
3 **Appendix 14: Professional indemnity insurance**  
4  
5  
6  
7  
8  
9

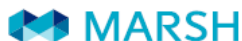

Cliffe Crowther  
Marsh Ltd  
Belvedere  
12 Booth Street  
Manchester  
M2 4AW  
+44 (0) 161 954 7317  
Fax +44 (0) 161 954 7210  
Cliffe.crowther@marsh.com  
www.marsh.com

16 **To whom it may concern**  
17  
18  
19  
20  
21

22 29<sup>th</sup> May 2015  
23  
24  
25

26 Dear Sirs,  
27

28 **CONFIRMATION OF INSURANCE – The University of Manchester and Subsidiary  
29 Companies**

30 As requested by the above client, we are writing to confirm that we act as Insurance Brokers to  
31 the client and that we have arranged insurance(s) on its behalf as detailed below:  
32

33 **PROFESSIONAL INDEMNITY INSURANCE**

|                     |                                                                                                    |
|---------------------|----------------------------------------------------------------------------------------------------|
| INSURERS            | Novae Underwriting Ltd.                                                                            |
| POLICY NUMBER       | 003210MMA15C                                                                                       |
| PERIOD OF INSURANCE | 01 June 2015 to 31 <sup>st</sup> May 2016, both dates inclusive.                                   |
| LIMIT OF INDEMNITY  | GBP10,000,000 any one claim and in the aggregate any one insurance period plus costs and expenses. |
| DEDUCTIBLE          | GBP20,000 each & every claim including costs and expenses                                          |



Registered in England Number: 1507274, Registered Office:  
1 Tower Place West, Tower Place, London EC3R 5BU.  
Marsh Ltd is authorised and regulated by the Financial Conduct  
Authority



58  
59  
60 V 1.3  
21/10/15



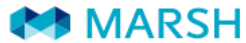

Page 2  
29<sup>th</sup> of May 2015

We have placed the insurance which is the subject of this letter after consultation with the client and based upon the client's instructions only. Terms of coverage, including limits and deductibles, are based upon information furnished to us by the client, which information we have not independently verified.

This letter is issued as a matter of information only and confers no right upon you other than those provided by the policy. This letter does not amend, extend or alter the coverage afforded by the policies described herein. Notwithstanding any requirement, term or condition of any contract or other document with respect to which this letter may be issued or pertain, the insurance afforded by the policy (policies) described herein is subject to all terms, conditions, limitations, exclusions and cancellation provisions and may also be subject to warranties. Limits shown may have been reduced by paid claims.

We express no view and assume no liability with respect to the solvency or future ability to pay of any of the insurance companies which have issued the insurance(s).

We assume no obligation to advise yourselves of any developments regarding the insurance(s) subsequent to the date hereof. This letter is given on the condition that you forever waive any liability against us based upon the placement of the insurance(s) and/or the statements made herein with the exception only of wilful default, recklessness or fraud.

This letter may not be reproduced by you or used for any other purpose without our prior written consent.

This letter shall be governed by and shall be construed in accordance with English law.

Yours faithfully

Cliffe Crowther

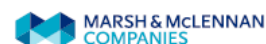

## References

1. Beck S, Wojdyla D, Say L, *et al*. The worldwide incidence of preterm birth: a systematic review of maternal mortality and morbidity. *Bull World Health Organ* 2010;88:31–38. doi:10.2471/BLT.08.062554.
2. Health and Social Care Information Centre. *Hospital Episode Statistics: NHS Maternity statistics — England, 2013–14*. Leeds, HSIC.
3. Saigal S, Doyle LW. An overview of mortality and sequelae of preterm birth from infancy to adulthood. *Lancet* 2008;371:261–9.
4. D’Onofrio BM, Class QA, Rickert ME, *et al*. Preterm birth and mortality and morbidity: a population-based quasi-experimental study. *JAMA Psychiatry* 2013; 70(11):1231-1240. doi:10.1001/jamapsychiatry.2013.2107 .
5. Mangham LJ, Petrou S, Doyle LW, *et al*. The cost of preterm birth throughout childhood in England and Wales. *Pediatrics* 2009;123(2):e312–27. doi: 10.1542/peds.2008-1827.
6. Alfirevic Z, Allen-Coward H, Molina F, *et al*. Targeted therapy for threatened preterm labor based on sonographic measurement of the cervical length: a randomized controlled trial. *Ultrasound Obstet Gynecol* 2007;29:47–50. DOI: 10.1002/uog.3908.
7. Salim R, Garmi G, Nachum Z, *et al*. Nifedipine compared with atosiban for treating preterm labor: a randomized controlled trial. *Obstet Gynecol* 2012;120:1323–31. DOI:10.1097/AOG.0b013e3182755dff
8. Roberts D, Dalziel SR. Antenatal corticosteroids for accelerating fetal lung maturation for women at risk of preterm birth. *Cochrane Database of Systematic Reviews* 2006, Issue 3. Art. No.: CD004454. DOI: 10.1002/14651858.CD004454.pub2.
9. Crowther CA, McKinlay CJD, Middleton P, Harding JE. Repeat doses of prenatal corticosteroids for women at risk of preterm birth for improving neonatal health outcomes.

- 1  
2  
3  
4  
5  
6  
7  
8  
9  
10  
11  
12  
13  
14  
15  
16  
17  
18  
19  
20  
21  
22  
23  
24  
25  
26  
27  
28  
29  
30  
31  
32  
33  
34  
35  
36  
37  
38  
39  
40  
41  
42  
43  
44  
45  
46  
47  
48  
49  
50  
51  
52  
53  
54  
55  
56  
57  
58  
59  
60
- Cochrane Database of Systematic Reviews* 2015, Issue 7. Art. No.: CD003935. DOI:  
10.1002/14651858.CD003935.pub4.
10. Doyle LW, Crowther CA, Middleton P, Marret S, Rouse D. Magnesium sulphate for women at risk of preterm birth for neuroprotection of the fetus. *Cochrane Database of Systematic Reviews* 2009, Issue 1. Art. No.: CD004661. DOI:10.1002/14651858.CD004661.pub3.
11. Royal College of Obstetricians and Gynaecologists. *Tocolysis for women in preterm labour: Green-top Guideline No. 1b*. 2011. London: RCOG.
12. Murphy KE, Hannah ME, Willan AR, Hewson SA, Ohlsson A, Kelly EN, Matthews SG, Saigal S, Asztalos E, Ross S, Delisle M-F, Amankwah K, Guselle P, Gafni A, Lee SK, Armson BA, for the MACS Collaborative Group. Multiple courses of antenatal corticosteroids for preterm birth (MACS): a randomised controlled trial. *Lancet* 2008; 372: 2143–51.
13. Norberg H, Stålnacke J, Diaz Heijtz R, Smedler A-C, Nyman M, Forssberg H, Norman M. Antenatal corticosteroids for preterm birth: dose-dependent reduction in birthweight, length and head circumference. *Acta Paediatrica* 2011;100:364–9.
14. Asztalos E, Willan A, Murphy K, Matthews S, Ohlsson A, Saigal S, Armson A, Kelly E, Delisle M-F, Gafni A, Lee S, Sananes R, Rovet J, Guselle P, Amankwah K, for the MACS-5 Collaborative Group. Association between gestational age at birth, antenatal corticosteroids, and outcomes at 5 years: multiple courses of antenatal corticosteroids for preterm birth study at 5 years of age (MACS-5). *BMC Pregnancy and Childbirth* 2014; 14:272.
15. Jacquemyn Y, Zecic A, Van Laere D, Roelens K. The use of intravenous magnesium in non-preeclamptic pregnant women: fetal/neonatal neuroprotection. *Arch Gynecol Obstet* 2015;291:969–975.
16. Gyetvai K, Hannah ME, Ellen D, Hodnett ED, Ohlsson A. Tocolytics for preterm labour: a systematic review. *Obstetrics and Gynecology* 1999;94(5):869–77.
17. Hill WC. Risks and complications of tocolysis. *Clinical Obstetrics and Gynecology* 1995;38(4):725–45.

- 1  
2  
3 18. Kent RA, Yazbek M, Heyns T, et al. The support needs of high-risk antenatal patients in  
4 prolonged hospitalisation. *Midwifery* 2015;31:164–9.  
5  
6  
7  
8 19. Lasswell SM, Barfield WD, Rochat RW, Blackmon L. Perinatal Regionalization for Very Low-  
9 Birth-Weight and Very Preterm Infants: A Meta-analysis. *JAMA*. 2010;304(9):992-1000.  
10 doi:10.1001/jama.2010.1226.  
11  
12  
13  
14 20. Marlow N, Bennett C, Drasper ES, Hennessy EM, Morgan AS, Costeloe KL. Perinatal  
15 outcomes for extremely preterm babies in relation to place of birth in England: The EPICure  
16 2 study. *Arch Dis Child Fetal Neonatal Ed* 2014;99:F181–88.  
17  
18  
19  
20 21. Towers TV, Bonebrake R, Padilla G, Rumney P. The effect of transport on the rate of severe  
21 intraventricular hemorrhage in very low birth weight infants. *Obstetrics and Gynecology*  
22 2000;95(2):291–295.  
23  
24  
25  
26 22. Porcellato L, Masson G, O’Mahony F, Jenkinson S, Vanner T, Cheshire K, Perkins E. ‘It’s  
27 something you have to put up with’— service users’ experiences of in utero transfer: a  
28 qualitative study. *BJOG* 2015; DOI: 10.1111/1471-0528.13235.  
29  
30  
31  
32 23. Bond PA, Crisp AS, Morgan MEI, Lobb MO, Cooke RWI. Maternal attitudes to transfer before  
33 delivery. *Journal of Reproductive and Infant Psychology* 1984;2(1):33–41. DOI:  
34 10.1080/02646838408403447.  
35  
36  
37  
38 24. Wilson AM, MacLean D, Skeoch CH, Jackson L. An evaluation of the financial and emotional  
39 impact of *in utero* transfers upon families: a Scotland-wide audit. *Infant* 2010;6(2):38–40.  
40  
41  
42  
43 25. Coster-Schulz MA, Mackey MC. The preterm labour experience: a balancing act. *Clinical*  
44 *Nursing Research* 1998;335–59.  
45  
46  
47  
48 26. Gale C, Hay A, Phillip C, et al. In-utero transfer is too difficult: results from a prospective  
49 study. *Early Human Development* 2012;88:147–50.  
50  
51  
52  
53 27. Macintyre-Beon C, Skeoch C, Jackson J, Booth P, Cameron A. *Perinatal Collaborative*  
54 *Transport Study: Final report*. 2008. Glasgow: Scottish Neonatal Transport Service.  
55  
56  
57  
58  
59  
60

- 1  
2  
3 28. O'Brien ET, Quenby S, Lavender T. Women's view of high risk pregnancy under threat of  
4 preterm birth. *Sexual and Reproductive Health* 2010;1:79–84.  
5  
6  
7  
8 29. Hezelgrave NL, Shennan AH, David AL. Tests to predict imminent delivery in threatened  
9 preterm labour. *BMJ* 2015;350:h2183 doi: 10.1136/bmj.h2183.  
10  
11  
12 30. Chandiramani M, Di Renzo GC, Gottschalk E, Helmer H, Henrich W, Hoesli I, Mol B, Norman  
13 JE, Robson S, Thornton S, Shennan A. Fetal fibronectin as a predictor of spontaneous  
14 preterm birth: a European perspective. *The Journal of Maternal-Fetal & Neonatal Medicine*  
15 2011;24(2):330–336.  
16  
17  
18 31. Deshpande SN, van Asselt ADI, Tomini F, Armstrong N, Allen A, Noake C, et al. Rapid fetal  
19 fibronectin testing to predict preterm birth in women with symptoms of premature labour: a  
20 systematic review and cost analysis. *Health Technol Assess* 2013;17(40).  
21  
22  
23 32. Radford S, Abbott D, Seed P, Kemp J, Shennan. Quantitative fetal fibronectin for the  
24 prediction of preterm birth in symptomatic women. *Arch Dis Child Fetal Neonatal Ed*  
25 2012;97(Suppl 1):A1–A125.  
26  
27  
28 33. Harrison MJ, Kushner KE, Benzies K, et al. Women's satisfaction with their involvement in  
29 health care decisions during a high-risk pregnancy. *Birth* 2003;30(2):109–15.  
30  
31  
32 34. Hill JL, Campbell MK, Zou GY, et al. Prediction of preterm birth in symptomatic women using  
33 decision tree modelling for biomarkers. *Am J Obstet Gynecol* 2008;198:468.e1-468.e9.  
34  
35  
36 35. Gallagher K, Martin J, Keller M, et al. European variation in decision-making and parental  
37 involvement during preterm birth. *Arch Dis Child Fetal Neonatal Ed* 2014;99:F245–9.  
38  
39  
40 36. Peerzada JM, Schollin J, Håkansson S. Delivery room decision-making for extremely preterm  
41 infants in Sweden. *Pediatrics* 2006;117(6):1988–95.  
42  
43  
44 37. Smith J, Firth J. Qualitative data analysis: the framework approach. *Nurse Researcher*  
45 2011;18(2):52–62.  
46  
47  
48 38. Rabiee F. Focus group interview and data analysis. *Proceedings of the Nutrition Society*  
49 2004;63: 655–660.  
50  
51  
52  
53  
54  
55  
56  
57  
58  
59  
60

- 1  
2  
3 39. Furber C. Framework analysis: a method for analysing qualitative data. *African Journal of*  
4  
5 *Midwifery and Women's Health* 2010;4(2):97–100.  
6  
7  
8 40. Sword W. Accounting for presence of self: reflections on doing qualitative research.  
9  
10 *Qualitative Health Research* 1999;9(2):270–8.  
11  
12 41. Haigh C, Witham G. *Distress protocol for qualitative data collection*. 2015. [Online] available  
13  
14 at:  
15  
16 [http://www2.mmu.ac.uk/media/mmuacuk/content/documents/rke/Advisory%20Distress%2](http://www2.mmu.ac.uk/media/mmuacuk/content/documents/rke/Advisory%20Distress%20Protocol.pdf)  
17  
18 [0Protocol.pdf](http://www2.mmu.ac.uk/media/mmuacuk/content/documents/rke/Advisory%20Distress%20Protocol.pdf) accessed October 2015.  
19  
20  
21  
22  
23  
24  
25  
26  
27  
28  
29  
30  
31  
32  
33  
34  
35  
36  
37  
38  
39  
40  
41  
42  
43  
44  
45  
46  
47  
48  
49  
50  
51  
52  
53  
54  
55  
56  
57  
58  
59  
60
